# Supplementary material
Source: publisher figshare collection journal article supplement (https://acs.figshare.com/ndownloader/files/3788263)
Supplement: Supplementary file 1 [file 3788263]

# Versatile Enantioselective Synthesis of Functionalized Lactones via Copper-Catalyzed Radical Oxyfunctionalization of Alkenes

Rong Zhu and Stephen L. Buchwald\*

Department of Chemistry, Massachusetts Institute of Technology, Cambridge, Massachusetts  
02139, United States

## SUPPORTING INFORMATION

**General considerations.** All reactions were carried out with dry solvents under anhydrous conditions, unless otherwise noted. Anhydrous ethyl acetate (EtOAc), methyl *tert*-butyl ether (MTBE) and 2,2'-isopropylidenebis[(4*S*)-4-*tert*-butyl-2-oxazoline] (99%) were purchased from Aldrich and used as received. Tetrakis(acetonitrile)copper(I) hexafluorophosphate was purchased from Strem and stored in a dry box. Reagents were purchased at the highest commercial quality and used without further purification, unless otherwise stated. All chemicals were weighed on the bench top, in the air. Reactions were monitored by <sup>1</sup>H NMR spectroscopy and thin-layer chromatography (TLC) carried out on 0.25 mm E. Merck silica gel plates (60F-254) using UV light as a visualizing agent and phosphomolybdic acid in ethanol or iodine on silica gel as developing agents. Flash silica gel chromatography was performed using Silicycle SiliaFlashP60 (230-400 mesh) silica gel. <sup>1</sup>H and <sup>13</sup>C NMR spectra were recorded on a Bruker AMX 400 spectrometer and were calibrated using residual solvent as an internal reference (CDCl<sub>3</sub>: 7.26 ppm for <sup>1</sup>H NMR and 77.16 ppm for <sup>13</sup>C NMR). <sup>19</sup>F NMR spectra were recorded on a Varian 300 MHz spectrometer or a Bruker AMX 400 spectrometer and were calibrated using CFCI<sub>3</sub> as an external reference (0 ppm). The following abbreviations were used to explain the multiplicities: s = singlet, d = doublet, t = triplet, q = quartet, m = multiplet, b = broad, at = apparent triplet, ad = apparent doublet. IR spectra were recorded on a Thermo Scientific Nicolet iS5 FT-IR spectrometer (iD5 ATR). HPLC analyses were performed on an Angilent 1100 series system with Daicel Chiralcel<sup>®</sup> columns (4.6 mm x 250 mm) in hexanes/*i*-PrOH mixtures. Melting points (m.p.) were obtained on a Mel-Temp capillary melting point apparatus. Optical rotations were measured on Jasco P-1010 polarimeter with a sodium lamp (589 nm) at 24 °C. Elemental analyses were performed by Atlantic Microlabs Inc., Norcross, GA. HRMS (DART or ESI)

spectra were recorded on a Bruker Daltonics APEXIV 4.7 Tesla Fourier transform ion cyclotron resonance mass spectrometer (FT-ICR-MS).

### Synthesis and Characterization of non-Commercial Substrates

4-Phenylpent-4-enoic acid (**2a**),<sup>1</sup> 4-(4-bromophenyl)pent-4-enoic acid (**2b**),<sup>1</sup> 4-(4-chlorophenyl)pent-4-enoic acid (**2c**),<sup>1</sup> 4-(4-trifluoromethylphenyl)pent-4-enoic acid (**2e**),<sup>1</sup> 4-(4-methoxyphenyl)pent-4-enoic acid (**2f**),<sup>2</sup> 4-(3-thienyl)pent-4-enoic acid (**2g**),<sup>1</sup> 4-(3-acetylphenyl)pent-4-enoic acid (**2h**),<sup>1</sup> 5-phenylhex-5-enoic acid (**2i**),<sup>1</sup> 3,3-dimethyl-5-phenylhex-5-enoic acid (**2j**),<sup>1</sup> (*Z*)-5-phenylhept-5-enoic acid ((*Z*)-**2m**, *Z*:*E* = 14:1 as determined by <sup>1</sup>H NMR analysis),<sup>1</sup> (*E*)-5-phenylhept-5-enoic acid ((*E*)-**2m**, *Z*:*E* < 1:20 as determined by <sup>1</sup>H NMR analysis),<sup>1</sup> were prepared according to literature procedures.

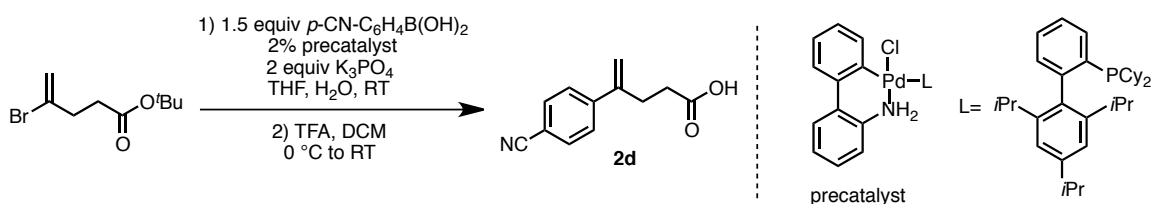

4-(4-Cyanophenyl)pent-4-enoic acid (**2d**) : An oven-dried 100 mL round-bottom-flask equipped with a magnetic stir bar was charged with 4-cyanophenyl boronic acid (1.5 equiv, 0.96 g, 6.5 mmol) and precatalyst (80 mg, 0.02 equiv). The flask was sealed with a rubber septum and connected to a Schlenk line through a needle. The flask was then evacuated and backfilled with argon (This sequence was repeated a total of three times). *tert*-Butyl 4-bromopent-4-enoate (1.02 g, 4.3 mmol, 1.0 equiv),<sup>3</sup> followed by anhydrous tetrahydrofuran (10 mL) and potassium phosphate aqueous solution (2 equiv, 1.84 g in 17 mL degassed water) was added via syringe. The resulting mixture was stirred at room temperature for 48 h before diluted with water (50 mL) and ethyl ether (50 mL). The aqueous phase was separated and extracted with ethyl ether (50 mL × 3). The combined organic layers were concentrated *in vacuo*. The residue was passed through a short plug of silica gel (1 cm × 4 cm) and eluted with hexanes/ethyl ether until all the coupling product was eluted as detected by TLC. The elute was concentrated *in vacuo* and redissolved in dichloromethane (20 mL), to which at 0 °C was added 6.5 mL (20 equiv) trifluoroacetic acid slowly. The resulting mixture was stirred at room temperature for 48 h before

concentrating *in vacuo* to remove the solvents and excess trifluoroacetic acid. The residue was purified by silica gel flash column chromatography (hexanes: ethyl acetate = 5:1 to 1:1) followed by one recrystallization to afford **2d** (0.35 g, 40% yield) as a pale yellow solid.

$^1\text{H}$  NMR (400 MHz,  $\text{CDCl}_3$ )  $\delta$  7.65 (d,  $J$  = 8.8 Hz, 2 H), 7.51 (d,  $J$  = 8.8 Hz, 2 H), 5.42 (s, 1 H), 5.25 (s, 1 H), 2.84 (t,  $J$  = 7.6 Hz, 2 H), 2.53 (t,  $J$  = 7.6 Hz, 2 H);  $^{13}\text{C}$  NMR (100 MHz,  $\text{CDCl}_3$ )  $\delta$  178.9, 145.2, 145.2, 132.4, 126.9, 118.9, 116.0, 111.4, 32.8, 29.7; IR (film)  $\nu_{\text{max}}$  2970, 2232, 1739, 1699, 1627, 1365, 1217, 905, 839  $\text{cm}^{-1}$ ;  $R_f$ (hexanes: ethyl acetate = 1:1) = 0.25; m. p. 101  $^\circ\text{C}$ . HRMS:  $[\text{M}+\text{NH}_4]^+$  Calcd. For  $\text{C}_{12}\text{H}_{15}\text{N}_2\text{O}_2$ : 219.1128; Found: 219.1128.

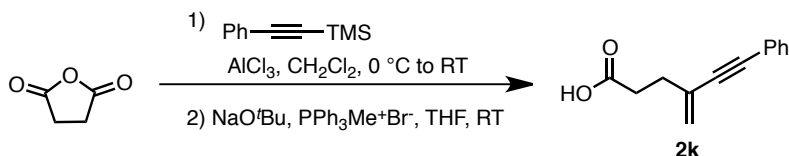

4-Methylene-6-phenylhex-5-ynoic acid (**2k**): Adapted from a previously reported procedure:<sup>4</sup> Powdered anhydrous  $\text{AlCl}_3$  (3.7 g, 28 mmol, 1.75 equiv) was added in portions to an ice-cold mixture of succinic anhydride (2.4 g, 24 mmol, 1.5 equiv) and 1-phenyl-2-trimethylsilylacetylene (3.1 mL, 16 mmol, 1.0 equiv) in 200 mL anhydrous  $\text{CH}_2\text{Cl}_2$ . The mixture was stirred at 0  $^\circ\text{C}$  for 2 h and then at room temperature for 16 h. The dark brown mixture was carefully quenched with 1 N HCl at 0  $^\circ\text{C}$ . The organic layer was separated and the aqueous layer was extracted with  $\text{CH}_2\text{Cl}_2$  (100 mL  $\times$  2). The combined organic phase was washed with 1 N HCl, water and brine, and dried over sodium sulfate. The solvent was removed *in vacuo* and the residue was purified by passing through a short silica gel column to afford the crude product 4-oxo-6-phenylhex-5-ynoic acid as a brown solid (1.6 g, 50 % yield) which was used in the next reaction without further purification.

An oven-dried 200 mL round-bottom-flask equipped with a magnetic stir bar was charged with methyltriphenylphosphonium bromide (3.7 g, 10.4 mmol, 1.3 equiv) and anhydrous THF (100 mL). The mixture was stirred at 0  $^\circ\text{C}$  and sodium *tert*-butoxide (2.0 g, 20.6 mmol, 2.6 equiv) was added in portions. The resulting yellow slurry was stirred at room temperature for 45 min before being cooled to 0  $^\circ\text{C}$ . At 0  $^\circ\text{C}$ , 4-oxo-6-phenylhex-5-ynoic acid (1.6 g, 8 mmol, 1.0 equiv) was added slowly to the reaction mixture. The resulting mixture was stirred at room temperature for 16 h before concentrating *in vacuo*. The residue was diluted with 200 mL 0.5 N

aqueous sodium hydroxide and washed with CH<sub>2</sub>Cl<sub>2</sub> (30 mL × 3). The aqueous layer was cooled to 0 °C, acidified (pH < 2), and extracted with Et<sub>2</sub>O (100 mL × 3). The combined organic layers were washed with water (30 mL × 3) and brine (30 mL), dried over sodium sulfate, and concentrated *in vacuo*. The residue was purified by silica gel flash column chromatography to afford **2k** as a yellow solid (0.77 g, 54% yield).

<sup>1</sup>H NMR (400 MHz, CDCl<sub>3</sub>) δ 7.46-7.43 (m, 2 H), 7.31 (m, 3 H), 5.47 (s, 1 H), 5.38 (d, *J* = 1.2 Hz, 1 H), 2.68 (t, *J* = 7.6 Hz, 2 H), 2.59 (t, *J* = 7.6 Hz, 2 H); <sup>13</sup>C NMR (100 MHz, CDCl<sub>3</sub>) δ 179.2, 131.8, 129.6, 128.5, 128.4, 123.1, 122.3, 90.2, 88.7, 33.0, 32.2; IR (film) ν<sub>max</sub> 2970, 1737, 1706, 1610, 1489, 1442, 1373, 1217, 901, 754, 689 cm<sup>-1</sup>; R<sub>f</sub>(hexanes: ethyl acetate = 2:1) = 0.50; m. p. 74 °C. Anal. Calcd. For C<sub>13</sub>H<sub>12</sub>O<sub>2</sub>: C, 77.98; H, 6.04. Found: C, 77.81; H, 6.05.

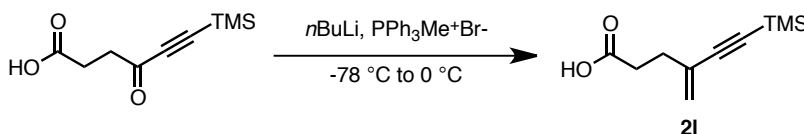

4-Methylene-6-(trimethylsilyl)hex-5-ynoic acid (**21**): An oven-dried 200 mL round-bottom-flask equipped with a magnetic stir bar was charged with methyltriphenylphosphonium bromide (12.8 g, 36 mmol, 2.4 equiv). The flask was sealed with a rubber septum and connected to a Schlenk line through a needle. The flask was briefly evacuated and backfilled with argon (this sequence was repeated a total of 3 times). Anhydrous THF (100 mL) was added via syringe. At -78 °C to the stirring mixture was added *n*-butyl lithium solution (2.5 M in hexane, 22 mL, 54 mmol, 3.6 equiv) dropwise. The reaction mixture was moved to a 0 °C bath and stirred at the same temperature for 0.5 h before being cooled to -78 °C. At -78 °C, a solution of 4-oxo-6-(trimethylsilyl)hex-5-ynoic acid<sup>5</sup> (3.1 g, 15 mmol, 1.0 equiv) in anhydrous THF (2 M) was added slowly to the reaction mixture via syringe. The resulting mixture was stirred at -78 °C for 0.5 h, then 0 °C for 2 h, and finally warmed to room temperature and stirred overnight. The reaction mixture was quenched at 0 °C by the addition of 70 mL 1 M HCl, 50 mL saturated aqueous NH<sub>4</sub>Cl and 50 mL brine. The aqueous layer was separated and extracted with ethyl ether. The combined organic layers were dried over Na<sub>2</sub>SO<sub>4</sub> and concentrated *in vacuo*. The residue was purified by silica gel flash column chromatography to afford **21** as a colorless oil. (1.34 g, 42% yield)

$^1\text{H}$  NMR (400 MHz,  $\text{CDCl}_3$ )  $\delta$  11.67 (br, 1 H), 5.41 (s, 1 H), 5.32 (s, 1 H), 2.61 (t,  $J$  = 7.6 Hz, 2 H), 2.48 (t,  $J$  = 7.6 Hz, 2 H), 0.19 (s, 9 H);  $^{13}\text{C}$  NMR (100 MHz,  $\text{CDCl}_3$ )  $\delta$  179.3, 129.6, 123.1, 104.4, 95.2, 32.8, 31.9, 0.0; IR (film)  $\nu_{\text{max}}$  2960, 2145, 1709, 1608, 1411, 1250, 904, 838, 759  $\text{cm}^{-1}$ ;  $R_f$ (hexanes: ethyl acetate = 2:1) = 0.70; HRMS:  $[\text{M}-\text{H}]^-$  Calcd. For  $\text{C}_{10}\text{H}_{15}\text{O}_2\text{Si}$ : 195.0847; Found: 195.0854.

## General Procedure and Characterization for the Copper-Catalyzed Enantioselective Oxyfunctionalization of Alkenes

### ***Enantioselective Oxyazidation:***

*General procedure A for the Cu-catalyzed enantioselective oxyazidation (Table 1):*

**Caution:** Proper safety precautions should be followed. This reaction should be carried out behind a blast shield and only on a small scale. It should be noted that while no incident occurred during this study, azides are potentially hazardous compounds and adequate safety measures should be taken.

An oven-dried 100 mL round bottom flask equipped with a Teflon-coated magnetic stir bar was charged with tetrakis(acetonitrile)copper(I) hexafluorophosphate (9.3 mg, 0.025 mmol, 0.05 equiv), 2,2'-isopropylidenebis[(4*S*)-4-*tert*-butyl-2-oxazoline] (**L**) (7.4 mg, 0.025 mmol, 0.05 equiv) and unsaturated carboxylic acid **2** (0.50 mmol, 1.0 equiv). The flask was sealed with a rubber septum and connected to a Schlenk line through a needle. The flask was briefly evacuated and backfilled with argon (this sequence was repeated a total of two times). The septum was removed, (diacetoxyiodo)benzene (403 mg, 1.25 mmol, 2.5 equiv, dried under high vacuum for 2 h in advance.) was quickly added into the flask and the flask was sealed again with the septum. The flask was connected to a Schlenk line through a needle. The reaction flask was then briefly evacuated and backfilled with argon (this sequence was repeated a total of three times). The reaction flask was cooled to  $-78\text{ }^\circ\text{C}$ . At the same temperature, without stirring, anhydrous diethyl ether (30 mL) was added to the flask via syringe followed by trimethylsilyl azide (158  $\mu\text{L}$ , 1.20 mmol, 2.4 equiv). After cooled at  $-78\text{ }^\circ\text{C}$  for 2 min, the argon pressure was removed. A venting needle was inserted. The reaction mixture was moved to a  $-10\text{ }^\circ\text{C}$  bath and

stirred at the same temperature for 16 h. The reaction mixture was quenched carefully with saturated aqueous sodium bicarbonate solution (20 mL). The aqueous layer was separated and extracted with diethyl ether (15 mL $\times$ 3). The combined organic layers was concentrated *in vacuo*. The residue was purified by silica gel flash column chromatography (EtOAc/hexanes/toluene, using UV light as a visualizing agent and phosphomolybdic acid in ethanol or iodine on silica gel as developing agents) to afford the oxyazidation product **4**.

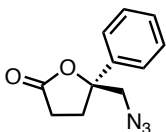

**(S)-5-(azidomethyl)-5-phenyldihydrofuran-2(3H)-one (4a)** Following general procedure A, the title compound was synthesized from 4-phenyl-4-pentenoic acid (**2a**) (88.0 mg, 0.50 mmol). The product was purified by silica gel flash

column chromatography (hexanes: toluene: ethyl acetate = 1:0:0 to 0:1:0 to 0:12:1 to 0:8:1) to afford **4a** (66.9 mg, 62% yield, 89% ee) as a pale yellow sticky oil.  $^1\text{H}$  NMR (400 MHz,  $\text{CDCl}_3$ )  $\delta$  7.42-7.33 (m, 5 H), 3.67 (d,  $J$  = 13.2 Hz, 1 H), 3.53 (d,  $J$  = 13.2 Hz, 1 H), 2.78-2.65 (m, 2 H), 2.55-2.40 (m, 2 H);  $^{13}\text{C}$  NMR (100 MHz,  $\text{CDCl}_3$ )  $\delta$  175.7, 140.6, 128.9, 128.6, 124.7, 87.7, 60.0, 31.4, 28.7; IR (film)  $\nu_{\text{max}}$  2096, 1772, 1739, 1448, 1365, 1196, 1062, 935  $\text{cm}^{-1}$ ;  $R_f$ (toluene: ethyl acetate = 4:1) = 0.6; Anal. Calcd. For  $\text{C}_{11}\text{H}_{11}\text{N}_3\text{O}_2$ : C, 60.82; H, 5.10. Found: C, 61.11; H, 5.18.  $[\alpha]_{\text{D}}^{24}$  = -28.1 ( $c$  = 0.8,  $\text{CHCl}_3$ ). The enantiomeric excess was determined by chiral HPLC analysis: Chiralcel OD-H 4.6 mm  $\times$  250 mm, hexanes:*i*-PrOH = 95:5, 1.0 mL/min, 210 nm,  $t_R$  = 20.6 min (major) and 26.3 min (minor).

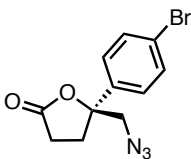

**(S)-5-(azidomethyl)-5-(4-bromophenyl)dihydrofuran-2(3H)-one (4b)**

Following general procedure A, the title compound was synthesized from 4-(4-bromophenyl)pent-4-enoic acid (**2b**) (127.5 mg, 0.50 mmol). The product was purified by silica gel flash column chromatography (hexanes: toluene: ethyl acetate = 1:0:0 to 10:0:1 to 6:1:1 to 4:2:1) to afford **4b** (82.6 mg, 56% yield, 89% ee) as a colorless oil.  $^1\text{H}$  NMR (400 MHz,  $\text{CDCl}_3$ )  $\delta$  7.53 (d,  $J$  = 8.4 Hz, 2 H), 7.26 (d,  $J$  = 8.4 Hz, 1 H), 3.65 (d,  $J$  = 13.2 Hz, 1 H), 3.51 (d,  $J$  = 13.2 Hz, 1 H), 2.80-2.64 (m, 2 H), 2.52 (m, 1 H), 2.39 (m, 1 H);  $^{13}\text{C}$  NMR (100 MHz,  $\text{CDCl}_3$ )  $\delta$  175.3, 139.7, 132.1, 126.6, 122.9, 87.2, 59.9, 31.5, 28.7; IR (film)  $\nu_{\text{max}}$  2097, 1738, 1365, 1229, 1217, 1007  $\text{cm}^{-1}$ ;  $R_f$ (hexanes: toluene: ethyl acetate = 2:2:1) = 0.4; Anal. Calcd. For  $\text{C}_{11}\text{H}_{10}\text{N}_3\text{O}_2\text{Br}$ : C, 44.62; H, 3.40. Found: C, 44.90; H, 3.54.  $[\alpha]_{\text{D}}^{24}$  = + 4.8 ( $c$  = 1,  $\text{CHCl}_3$ ). The enantiomeric excess was determined by chiral HPLC analysis:

Chiralcel OD-H 4.6 mm x 250 mm, hexanes:*i*-PrOH = 95:5, 1.0 mL/min, 230 nm,  $t_R$  = 24.6 min (major) and 31.4 min (minor).

**SI-Scheme 1.** Synthesis and ORTEP presentation of **7b**. (thermal ellipsoids shown at 50% probability. Hydrogen atoms are omitted for clarity.)

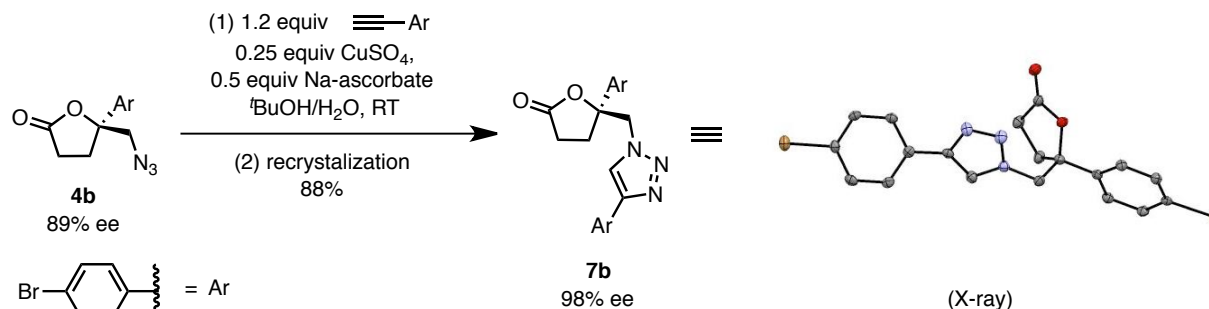

**Derivatization of 4b:** (**S**)-5-(4-bromophenyl)-5-((4-(4-bromophenyl)-1*H*-1,2,3-triazol-1-yl)methyl)dihydrofuran-2(3*H*)-one (**7b**) To a mixture of **4b** (1.0 equiv, 25 mg, 0.08 mmol), 4-bromophenylacetylene (1.2 equiv, 18 mg, 0.10 mmol) in  $\text{H}_2\text{O}/t\text{BuOH}$  (1 mL/1 mL) was added  $\text{CuSO}_4 \cdot 5\text{H}_2\text{O}$  (0.25 equiv, 5 mg) and sodium ascorbate (0.5 equiv, 8 mg). The resulting mixture was stirred at room temperature for 20 h before diluted with ethyl acetate (5 mL), saturated aqueous EDTA solution (0.2 mL) and water (5 mL). The aqueous layer was extracted with ethyl acetate (5 mL  $\times$  3). The combined organic layers were dried over  $\text{Na}_2\text{SO}_4$ , filtered through a short silica gel plug, and concentrated *in vacuo*. The residue was triturated with hexanes, and then recrystallized in  $\text{CH}_2\text{Cl}_2/\text{EtOAc}$  to afford **7b** as a colorless crystalline solid (35.4 mg, 88% yield, 98% ee).  $^1\text{H}$  NMR (400 MHz,  $\text{CDCl}_3$ )  $\delta$  7.86 (s, 1 H), 7.68 (d,  $J$  = 8.8 Hz, 2 H), 7.57 (m, 4 H), 7.31 (d,  $J$  = 8.8 Hz, 2 H), 4.84 (d,  $J$  = 14.8 Hz, 1 H), 4.68 (d,  $J$  = 14.8 Hz, 1 H), 2.71 (ddd,  $J$  = 13.2, 9.6, 8.0 Hz, 1 H), 2.50 (ddd,  $J$  = 13.2, 10.0, 5.2 Hz, 1 H), 2.40 (ddd,  $J$  = 17.2, 9.6, 8.0 Hz, 1 H), 2.12 (ddd,  $J$  = 17.2, 9.6, 5.2 Hz, 1 H);  $^{13}\text{C}$  NMR (100 MHz,  $\text{CDCl}_3$ )  $\delta$  174.9, 147.6, 138.6, 132.5, 132.2, 129.1, 127.5, 126.6, 123.4, 122.6, 121.5, 86.5, 58.3, 31.4, 28.0; IR (film)  $\nu_{\text{max}}$  1738, 1455, 1365, 1229, 1217, 1000, 922, 831, 817  $\text{cm}^{-1}$ ;  $R_f$  (hexanes : ethyl acetate = 1:1) = 0.5; Anal. Calcd. For  $\text{C}_{19}\text{H}_{15}\text{N}_3\text{O}_2\text{Br}_2$ : C, 47.83; H, 3.17. Found: C, 47.78; H, 3.09.  $[\alpha]_D^{24} = +51.0$  ( $c$  = 0.5,  $\text{CH}_2\text{Cl}_2$ ). m. p. 235-236  $^\circ\text{C}$ . The enantiomeric excess was determined by chiral HPLC analysis: Chiralcel IA 4.6 mm x 250 mm, hexanes:*i*-PrOH = 80:20, 1.0 mL/min, 254 nm,  $t_R$  =

37.0 min (major) and 21.6 min (minor). The absolute stereochemistry of **7b** was assigned by X-ray crystallography, based on which the absolute stereochemistry of **4b** was assigned. The absolute stereochemistry of **4a**, **4c-n**, **8a-c**, **9a-d**, **13**, **14** and **15** were assigned based on analogy to **4b**.

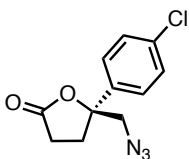

**(S)-5-(azidomethyl)-5-(4-chlorophenyl)dihydrofuran-2(3H)-one (4c)**

Following general procedure A, the title compound was synthesized from 4-(4-chlorophenyl)pent-4-enoic acid (**2c**) (105 mg, 0.50 mmol). The product was purified by silica gel flash column chromatography (hexanes: toluene: ethyl acetate = 1:0:0 to 0:1:0 to 0:12:1 to 0:7:1) to afford **4c** (65.7 mg, 52% yield, 89% ee) as a pale yellow oil. <sup>1</sup>H NMR (400 MHz, CDCl<sub>3</sub>) δ 7.38 (d, *J* = 9.0 Hz, 2 H), 7.32 (d, *J* = 9.0 Hz, 2 H), 3.65 (d, *J* = 12.8 Hz, 1 H), 3.52 (d, *J* = 12.8 Hz, 1 H), 2.80-2.65 (m, 2 H), 2.52 (m, 1 H), 2.39 (m, 1 H), ; <sup>13</sup>C NMR (100 MHz, CDCl<sub>3</sub>) δ 175.4, 139.2, 134.7, 129.2, 126.2, 87.2, 59.9, 31.5, 28.7; IR (film) ν<sub>max</sub> 2097, 1774, 1492, 1277, 1175, 1068, 1011, 935 cm<sup>-1</sup>; R<sub>f</sub>(toluene: ethyl acetate = 4:1) = 0.3; Anal. Calcd. For C<sub>11</sub>H<sub>10</sub>N<sub>3</sub>O<sub>2</sub>Cl: C, 52.50; H, 4.01. Found: C, 52.35; H, 4.11. [α]<sub>D</sub><sup>24</sup> = +1.3 (c = 0.9, CHCl<sub>3</sub>). The enantiomeric excess was determined by chiral HPLC analysis: Chiralcel OD-H 4.6 mm x 250 mm, hexanes: *i*-PrOH = 95:5, 1.0 mL/min, 230 nm, t<sub>R</sub> = 20.0 min (major) and 24.6 min (minor).

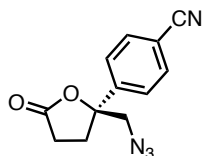

**(S)-5-(azidomethyl)-5-(4-cyanophenyl)dihydrofuran-2(3H)-one (4d)**

Following a slightly modified general procedure A in which the combined organic layers after ethyl ether extraction was briefly washed with Na<sub>2</sub>CO<sub>3</sub> aqueous solution (0.02 M, 10 mL × 2) before concentrating *in vacuo*, the title compound was synthesized from 4-(4-cyanophenyl)pent-4-enoic acid (**2d**) (100 mg, 0.50 mmol). The product was purified by silica gel flash column chromatography (hexanes: toluene: ethyl acetate = 1:0:0 to 0:1:0 to 0:10:1 to 0:6:1) to afford **4d** (56.5 mg, 47% yield, 90% ee) as a pale yellow oil. <sup>1</sup>H NMR (400 MHz, CDCl<sub>3</sub>) δ 7.71 (d, *J* = 8.4 Hz, 2 H), 7.52 (d, *J* = 8.4 Hz, 2 H), 3.66 (d, *J* = 13.2 Hz, 1 H), 3.57 (d, *J* = 13.2 Hz, 1 H), 2.84-2.69 (m, 2 H), 2.53 (m, 1 H), 2.40 (m, 1 H), ; <sup>13</sup>C NMR (100 MHz, CDCl<sub>3</sub>) δ 174.9, 145.8, 132.8, 125.8, 118.2, 112.8, 86.8, 59.7, 31.5, 28.5; IR (film) ν<sub>max</sub> 2229, 2102, 1778, 1176, 1070, 937, 838, 729 cm<sup>-1</sup>; R<sub>f</sub>(toluene: ethyl acetate = 3:1) = 0.4; Anal. Calcd. For C<sub>12</sub>H<sub>10</sub>N<sub>4</sub>O<sub>2</sub>: C, 59.50; H, 4.16. Found: C, 59.57; H, 4.42. [α]<sub>D</sub><sup>24</sup> = + 10.8 (c = 0.5, CHCl<sub>3</sub>). The enantiomeric excess was determined by chiral HPLC analysis: Chiralcel OD-H



4.6 mm x 250 mm, hexanes:*i*-PrOH = 85:15, 1.0 mL/min, 230 nm,  $t_R$  = 30.6 min (major) and 34.3 min (minor).

**(S)-5-(azidomethyl)-5-(4-trifluoromethylphenyl)dihydro furan-2(3H)-one (4e)** Following a slightly modified general procedure A in which (1) tetrakis(acetonitrile)copper(I) hexafluorophosphate (14.9 mg, 0.04 mmol, 0.08 equiv) and 2,2'-isopropylidenebis[(4S)-4-*tert*-butyl-2-oxazoline] (**L**) (11.8 mg, 0.04 mmol, 0.08 equiv) were used; (2) the combined organic layers after ethyl ether extraction was briefly washed with Na<sub>2</sub>CO<sub>3</sub> aqueous solution (0.02 M, 10 mL × 2) before concentrating *in vacuo*,

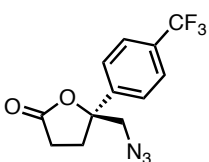

the title compound was synthesized from 4-(4-trifluoromethylphenyl)pent-4-enoic acid (**2e**) (122 mg, 0.50 mmol). The product was purified by silica gel flash column chromatography (hexanes: toluene: ethyl acetate = 1:0:0 to 0:1:0 to 0:12:1 to 0:8:1) to afford **4e** (65.5 mg, 46% yield, 90% ee) as a colorless oil. <sup>1</sup>H NMR (400 MHz, CDCl<sub>3</sub>) δ 7.68 (d, *J* = 8.4 Hz, 2 H), 7.53 (d, *J* = 8.4 Hz, 1 H), 3.68 (d, *J* = 13.2 Hz, 1 H), 3.57 (d, *J* = 13.2 Hz, 1 H), 2.84-2.70 (m, 2 H), 2.54 (m, 1 H), 2.43 (m, 1 H); <sup>13</sup>C NMR (100 MHz, CDCl<sub>3</sub>) δ 175.2, 144.7, 131.1 (q, *J*<sub>CF</sub> = 32 Hz), 126.1 (q, *J*<sub>CF</sub> = 4 Hz), 125.4, 123.9 (q, *J*<sub>CF</sub> = 270 Hz), 87.1, 59.9, 31.6, 28.6; <sup>19</sup>F NMR (376 MHz, CDCl<sub>3</sub>) δ -62.8 (s); IR (film)  $\nu_{\max}$  2102, 1738, 1365, 1229, 1217, 1115, 1077 cm<sup>-1</sup>; *R*<sub>f</sub> (toluene: ethyl acetate = 6:1) = 0.2; HRMS: [M+NH<sub>4</sub>]<sup>+</sup> Calcd. For C<sub>12</sub>H<sub>14</sub>N<sub>4</sub>F<sub>3</sub>O<sub>2</sub>: 303.1063; Found: 303.1050. [ $\alpha$ ]<sub>D</sub><sup>24</sup> = -11.6 (*c* = 0.4, CHCl<sub>3</sub>). The enantiomeric excess was determined by chiral HPLC analysis: Chiralcel OD-H 4.6 mm x 250 mm, hexanes:*i*-PrOH = 95:5, 1.0 mL/min, 210 nm,  $t_R$  = 19.8 min (major) and 25.6 min (minor).

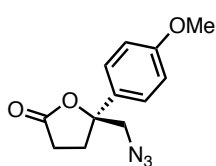

**(S)-5-(azidomethyl)-5-(4-methoxyphenyl)dihydrofuran-2(3H)-one (4f)**

Following general procedure A, the title compound was synthesized from 4-(4-methoxyphenyl)pent-4-enoic acid (**2f**) (103 mg, 0.50 mmol). The product was purified by silica gel flash column chromatography (hexanes: toluene: ethyl acetate = 1:0:0 to 0:1:0 to 0:12:1 to 0:7:1) to afford **4f** (79.6 mg, 65% yield, 75% ee) as a pale yellow oil. <sup>1</sup>H NMR (400 MHz, CDCl<sub>3</sub>) δ 7.29 (d, *J* = 8.8 Hz, 1 H), 6.91 (d, *J* = 8.8 Hz, 1 H), 3.80 (s, 3 H), 3.64 (d, *J* = 13.2 Hz, 1 H), 3.48 (d, *J* = 13.2 Hz, 1 H), 2.76-2.61 (m, 2 H), 2.51 (m, 1 H), 2.40 (m, 1 H); <sup>13</sup>C NMR (100 MHz, CDCl<sub>3</sub>) δ 175.8, 159.7, 132.4, 126.1, 114.2, 87.6, 60.1, 55.4, 31.3, 28.8; IR (film)  $\nu_{\max}$  2098, 1772, 1611, 1513, 1247, 1175, 1068, 934 cm<sup>-1</sup>; *R*<sub>f</sub> (toluene: ethyl acetate = 4:1) = 0.5; Anal. Calcd. For C<sub>12</sub>H<sub>13</sub>N<sub>3</sub>O<sub>3</sub>: C, 58.29; H, 5.30. Found: C, 58.44; H, 5.49.

$[\alpha]_D^{24} = +1.6$  ( $c = 0.6$ ,  $\text{CHCl}_3$ ). The enantiomeric excess was determined by chiral HPLC analysis: Chiralcel OD-H 4.6 mm x 250 mm, hexanes:*i*-PrOH = 95:5, 1.0 mL/min, 230 nm,  $t_R = 23.2$  min (major) and 27.6 min (minor).

**(S)-5-(azidomethyl)-5-(thiophen-3-yl)dihydrofuran-2(3H)-one (4g)** Following a slightly modified general procedure A in which additional 2,6-di-*tert*-butylpyridine (120 mL, 0.55 mmol, 1.1 equiv) was added via syringe after the addition of trimethylsilyl azide, the title compound was synthesized from 4-(3-thiophenyl)pent-4-enoic acid (**2g**) (91 mg, 0.50 mmol). The product was purified by silica gel flash column chromatography (hexanes: toluene: ethyl acetate = 10:0:1 to 6:1:1) to afford **4g** (76.1 mg, 68% yield, 82% ee) as a pale yellow oil.  $^1\text{H}$  NMR (400 MHz,  $\text{CDCl}_3$ )  $\delta$  7.38 (dd,  $J = 5.2$  Hz, 3.0 Hz, 1 H), 7.31 (dd,  $J = 3.0$  Hz, 1.2 Hz, 1 H), 7.02 (dd,  $J = 5.2$  Hz, 1.2 Hz, 1 H), 3.71 (d,  $J = 13.0$  Hz, 1 H), 3.53 (d,  $J = 13.0$  Hz, 1 H), 2.77-2.52 (m, 3 H), 2.40 (m, 1 H);  $^{13}\text{C}$  NMR (100 MHz,  $\text{CDCl}_3$ )  $\delta$  175.7, 141.7, 127.6, 124.7, 121.9, 86.4, 59.3, 31.3, 28.8; IR (film)  $\nu_{\text{max}}$  2102, 1775, 1181, 1070, 1040, 942, 847  $\text{cm}^{-1}$ ;  $R_f$ (toluene: ethyl acetate = 4:1) = 0.6; Anal. Calcd. For  $\text{C}_9\text{H}_9\text{N}_3\text{O}_2\text{S}$ : C, 48.42; H, 4.06. Found: C, 48.34; H, 3.97.  $[\alpha]_D^{24} = -9.0$  ( $c = 0.5$ ,  $\text{CHCl}_3$ ). The enantiomeric excess was determined by chiral HPLC analysis: Chiralcel OD-H 4.6 mm x 250 mm, hexanes:*i*-PrOH = 95:5, 1.0 mL/min, 230 nm,  $t_R = 29.0$  min (major) and 36.9 min (minor).

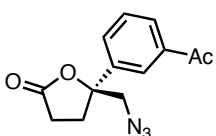

**(S)-5-(azidomethyl)-5-(3-acetylphenyl)dihydrofuran-2(3H)-one (4h)**

Following a slightly modified general procedure A in which tetrakis(acetonitrile)copper(I) hexafluorophosphate (14.9 mg, 0.04 mmol, 0.08 equiv) and 2,2'-isopropylidenebis[(4*S*)-4-*tert*-butyl-2-oxazoline] (**L**) (11.8 mg, 0.04 mmol, 0.08 equiv) were used, the title compound was synthesized from 4-(3-acetylphenyl)pent-4-enoic acid (**2h**) (109 mg, 0.50 mmol). The product was purified by silica gel flash column chromatography (hexanes: toluene: ethyl acetate = 1:0:0 to 0:1:0 to 0:10:1 to 0:5:1) to afford **4h** (67.7 mg, 52% yield, 90% ee) as a white solid.  $^1\text{H}$  NMR (400 MHz,  $\text{CDCl}_3$ )  $\delta$  7.92 (m, 2 H), 7.62 (m, 1 H), 7.51 (m, 1 H), 3.67 (d,  $J = 13.2$  Hz, 1 H), 3.57 (d,  $J = 13.2$  Hz, 1 H), 2.81-2.69 (m, 2 H), 2.61 (s, 3 H), 2.56-2.42 (m, 2 H);  $^{13}\text{C}$  NMR (100 MHz,  $\text{CDCl}_3$ )  $\delta$  197.6, 175.4, 141.5, 137.7, 129.5, 129.4, 128.7, 124.4, 87.3, 60.0, 31.5, 28.7, 26.8; IR (film)  $\nu_{\text{max}}$  2101, 1773, 1682, 1365, 1217, 1069, 938  $\text{cm}^{-1}$ ;  $R_f$ (toluene: ethyl acetate = 4:1) = 0.3; Anal. Calcd. For  $\text{C}_{13}\text{H}_{13}\text{N}_3\text{O}_3$ : C, 60.22; H, 5.05. Found: C, 60.38; H, 5.12.  $[\alpha]_D^{24} = -12.8$  ( $c = 0.5$ ,  $\text{CHCl}_3$ ). m. p. 80-81 °C. The

enantiomeric excess was determined by chiral HPLC analysis: Chiralcel IA 4.6 mm x 250 mm, hexanes:*i*-PrOH = 90:10, 1.0 mL/min, 230 nm,  $t_R$  = 20.5 min (major) and 18.7 min (minor).

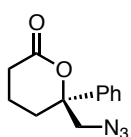

**(S)-6-(azidomethyl)-6-phenyltetrahydro-2H-pyran-2-one (4i)**

Following general procedure A, the title compound was synthesized from 5-phenylhex-5-enoic acid (**2i**) (95 mg, 0.50 mmol). The product was purified by silica gel flash column chromatography (hexanes: toluene: ethyl acetate = 1:0:0 to 0:1:0 to 0:12:1 to 0:8:1) to afford **4i** (69.8 mg, 60% yield, 89% ee) as a colorless oil.  $^1\text{H}$  NMR (400 MHz,  $\text{CDCl}_3$ )  $\delta$  7.43-7.32 (m, 5 H), 3.61 (d,  $J$  = 12.8 Hz, 1 H), 3.42 (d,  $J$  = 12.8 Hz, 1 H), 2.50 (ddd,  $J$  = 18 Hz, 9.6 Hz, 7.2 Hz, 1 H), 2.45 (ddd,  $J$  = 18 Hz, 7.2 Hz, 4 Hz, 1 H), 2.31-2.22 (m, 2 H), 1.83 (m, 1 H), 1.60 (m, 1 H);  $^{13}\text{C}$  NMR (100 MHz,  $\text{CDCl}_3$ )  $\delta$  170.5, 140.4, 129.2, 128.5, 125.3, 86.9, 60.8, 29.3, 29.1, 16.2; IR (film)  $\nu_{\text{max}}$  2096, 1736, 1447, 1232, 1187, 1048, 934  $\text{cm}^{-1}$ ;  $R_f$ (toluene: ethyl acetate = 4:1) = 0.6; Anal. Calcd. For  $\text{C}_{12}\text{H}_{13}\text{N}_3\text{O}_2$ : C, 62.33; H, 5.67. Found: C, 62.51; H, 5.78.  $[\alpha]_D^{24} = +24.9$  ( $c$  = 0.5,  $\text{CHCl}_3$ ). The enantiomeric excess was determined by chiral HPLC analysis: Chiralcel OD-H 4.6 mm x 250 mm, hexanes:*i*-PrOH = 95:5, 1.0 mL/min, 210 nm,  $t_R$  = 19.5 min (major) and 26.5 min (minor).

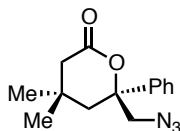

**(S)-6-(azidomethyl)-4,4-dimethyl-6-phenyltetrahydro-2H-pyran-2-one (4j)**

Following general procedure A, the title compound was synthesized from 3,3-dimethyl-5-phenylhex-5-enoic acid (**2j**) (109 mg, 0.50 mmol). The product was purified by silica gel flash column chromatography (hexanes: toluene : ethyl acetate = 1:0:0 to 0:1:0 to 0:20:1 to 0:15:1 to 0:10:1) to afford **4j** (83.0 mg, 64% yield, 92% ee) as a colorless oil.  $^1\text{H}$  NMR (400 MHz,  $\text{CDCl}_3$ )  $\delta$  7.43-7.30 (m, 5 H), 3.50 (d,  $J$  = 12.8 Hz, 1 H), 3.29 (d,  $J$  = 12.8 Hz, 1 H), 2.33-2.17 (m, 4 H), 1.09 (s, 3 H), 0.78 (s, 3 H);  $^{13}\text{C}$  NMR (100 MHz,  $\text{CDCl}_3$ )  $\delta$  171.0, 141.6, 129.0, 128.3, 125.1, 85.8, 62.0, 43.8, 41.7, 31.9, 30.7, 29.1; IR (film)  $\nu_{\text{max}}$  2970, 2097, 1739, 1447, 1365, 1217, 1060, 759, 702  $\text{cm}^{-1}$ ;  $R_f$ (toluene: ethyl acetate = 5:1) = 0.7; HRMS:  $[\text{M}+\text{Na}]^+$  Calcd. For  $\text{C}_{14}\text{H}_{17}\text{N}_3\text{O}_2\text{Na}$ : 282.1213; Found: 282.1205.  $[\alpha]_D^{24} = +35.9$  ( $c$  = 0.8,  $\text{CHCl}_3$ ). The enantiomeric excess was determined by chiral HPLC analysis: Chiralcel OD-H 4.6 mm x 250 mm, hexanes:*i*-PrOH = 95:5, 1.0 mL/min, 210 nm,  $t_R$  = 13.0 min (major) and 15.0 min (minor).

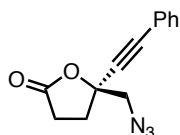

**(S)-5-(azidomethyl)-5-(phenylethynyl)dihydrofuran-2(3H)-one (4k)** Following a slightly modified general procedure A in which tetrakis(acetonitrile)copper(I)

hexafluorophosphate (14.9 mg, 0.04 mmol, 0.08 equiv) and 2,2'-isopropylidenebis[(4*S*)-4-*tert*-butyl-2-oxazoline] (**L**) (11.8 mg, 0.04 mmol, 0.08 equiv) were used, the title compound was synthesized from 4-methylene-6-phenylhex-5-ynoic acid (**2k**) (100 mg, 0.50 mmol). The product was purified by silica gel flash column chromatography (hexanes: toluene : ethyl acetate = 1:0:0 to 0:1:0 to 0:15:1 to 0:8:1) to afford **4k** (61.4 mg, 51% yield, 72% ee) as a colorless oil. <sup>1</sup>H NMR (400 MHz, CDCl<sub>3</sub>) δ 7.46-7.44 (m, 2 H), 7.38-7.31 (m, 3 H), 3.77 (d, *J* = 13.2 Hz, 1 H), 3.61 (d, *J* = 13.2 Hz, 1 H), 2.83 (ddd, *J* = 17.6 Hz, 9.6 Hz, 9.2 Hz, 1 H), 2.71 (ddd, *J* = 17.6 Hz, 7.6 Hz, 6.4 Hz, 1 H), 2.53-2.49 (m, 2 H); <sup>13</sup>C NMR (100 MHz, CDCl<sub>3</sub>) δ 175.2, 132.0, 129.5, 128.6, 121.1, 88.1, 85.3, 80.0, 57.9, 32.2, 28.7; IR (film) ν<sub>max</sub> 2990, 2099, 1738, 1365, 1228, 1217, 918, 756 cm<sup>-1</sup>; R<sub>f</sub>(hexanes: ethyl acetate = 2:1) = 0.5; HRMS: [M+NH<sub>4</sub>]<sup>+</sup> Calcd. For C<sub>13</sub>H<sub>15</sub>N<sub>4</sub>O<sub>2</sub>: 259.1190; Found: 259.1183. [α]<sub>D</sub><sup>24</sup> = +35.7 (c = 1, CHCl<sub>3</sub>). The enantiomeric excess was determined by chiral HPLC analysis: Chiralcel OD-H 4.6 mm x 250 mm, hexanes:*i*-PrOH = 95:5, 1.0 mL/min, 230 nm, t<sub>R</sub> = 17.0 min (major) and 19.7 min (minor).

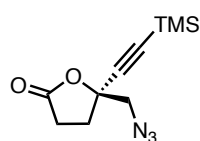

**(S)-5-(azidomethyl)-5-((trimethylsilyl)ethynyl)dihydrofuran-2(3H)-one (**4l**)**

Following a slightly modified general procedure A in which tetrakis(acetonitrile)copper(I) hexafluorophosphate (14.9 mg, 0.04 mmol, 0.08 equiv) and 2,2'-isopropylidenebis[(4*S*)-4-*tert*-butyl-2-oxazoline] (**L**) (11.8 mg, 0.04 mmol, 0.08 equiv) were used, the title compound was synthesized from 4-methylene-6-(trimethylsilyl)hex-5-ynoic acid (**2l**) (96 mg, 0.50 mmol). The product was purified by silica gel flash column chromatography (hexanes: toluene : ethyl acetate = 1:0:0 to 0:1:0 to 0:20:1 to 0:15:1 to 0:10:1) to afford **4l** (52.9 mg, 45% yield) as a colorless oil. <sup>1</sup>H NMR (400 MHz, CDCl<sub>3</sub>) δ 3.65 (d, *J* = 13.2 Hz, 1 H), 3.49 (d, *J* = 13.2 Hz, 1 H), 2.75 (ddd, *J* = 17.6 Hz, 9.6 Hz, 9.2 Hz, 1 H), 2.63 (ddd, *J* = 17.6 Hz, 7.2 Hz, 6.8 Hz, 1 H), 2.43-2.39 (m, 2 H), 0.18 (s, 9 H); <sup>13</sup>C NMR (100 MHz, CDCl<sub>3</sub>) δ 175.1, 101.2, 94.0, 79.4, 57.7, 32.1, 28.6, -0.4; IR (film) ν<sub>max</sub> 2103, 1784, 1739, 1365, 1249, 1174, 1056, 841 cm<sup>-1</sup>; R<sub>f</sub>(toluene: ethyl acetate = 10:1) = 0.6; HRMS: [M+NH<sub>4</sub>]<sup>+</sup> Calcd. For C<sub>10</sub>H<sub>19</sub>N<sub>4</sub>O<sub>2</sub>Si: 255.1272; Found: 255.1275. [α]<sub>D</sub><sup>24</sup> = +28.6 (c = 1, CHCl<sub>3</sub>).

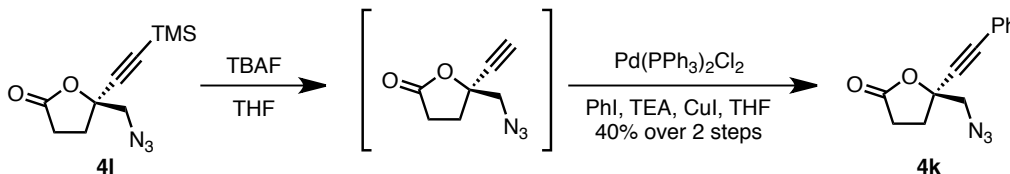

Enantiomeric excess determination of **4l** by converting to **4k**: To a solution of **4l** (15 mg, 0.06 mmol) in anhydrous THF (0.5 mL) was added tetrabutylammonium fluoride (1 M in THF, 0.12

mL) slowly at 0 °C. The yellow mixture was stirred at the same temperature for 0.5 h before diluted with saturated aqueous NH<sub>4</sub>Cl (1 mL). The aqueous layer was separated and extracted with ethyl ether (1 mL × 2). The combined organic layers was dried over Na<sub>2</sub>SO<sub>4</sub>, passed through a silica gel plug, and concentrated *in vacuo* to afford the crude product. Under an Ar atmosphere, a mixture of this crude product, PdCl<sub>2</sub>(PPh<sub>3</sub>)<sub>2</sub> (3.5 mg), iodobenzene (24 mg), and triethylamine (20 mg) in anhydrous THF (1 mL) was stirred at room temperature (25 °C) for 5 min before CuI (1.9 mg) was added. The reaction vessel was briefly evacuated and backfilled with argon. The reaction mixture was stirred at 70 °C for 2 h before diluted with ethyl ether (2 mL), saturated aqueous NH<sub>4</sub>Cl (1 mL) and 1 M aqueous HCl (1 mL). The aqueous layer was separated and extracted with ethyl ether (1 mL × 2). The combined organic layers was concentrated *in vacuo*. The residue was purified by preparative thin-layer-chromatography to afford **4k** (6 mg, *ca.* 40% yield over 2 steps, 82% ee). The enantiomeric excess was determined by chiral HPLC analysis: Chiralcel OD-H 4.6 mm x 250 mm, hexanes:*i*-PrOH = 95:5, 1.0 mL/min, 230 nm, *t<sub>R</sub>* = 17.0 min (major) and 19.7 min (minor).

#### Derivatization of Oxyazidation Product **4a** (Scheme 3)

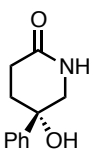

**(S)-5-hydroxy-5-phenylpiperidin-2-one (5)** A mixture of **4a** (32 mg, 0.15 mmol, 1.0 equiv, 89% ee) and 5% Pd/C (6 mg) in methanol (1 mL) was stirred at room temperature (25 °C) under H<sub>2</sub> atmosphere for 16 h. 4-Dimethylaminopyridine (2 mg, 0.015 mmol, 0.1 equiv) was added to the reaction mixture and the resulting mixture was stirred at room temperature for 8 h before concentrating *in vacuo*. The residue was purified by silica gel flash column chromatography (ethyl acetate: methanol = 1:0 to 5:1) to afford **5** (22 mg, 78% yield, 89% ee) as a colorless solid. <sup>1</sup>H NMR (400 MHz, CD<sub>3</sub>OD) δ 7.55 (m, 2 H), 7.37 (m, 2 H), 7.28 (m, 1 H), 3.60 (d, *J* = 12.8 Hz, 1 H), 3.28 (dd, *J* = 12.8 Hz, 2.8 Hz, 1 H), 2.67 (m, 1 H), 2.48-2.33 (m, 2 H), 2.01 (m, 1 H); <sup>13</sup>C NMR (100 MHz, CD<sub>3</sub>OD) δ 174.6, 146.6, 129.4, 128.5, 126.1, 70.8, 54.2, 33.5, 28.9; IR (film) *v*<sub>max</sub> 3225, 2917, 2384, 1633, 1494, 1233, 978, 768 cm<sup>-1</sup>; *R<sub>f</sub>*(methanol: ethyl acetate = 5:1) = 0.40; HRMS: [M+H]<sup>+</sup> Calcd. For C<sub>11</sub>H<sub>14</sub>NO<sub>2</sub>: 192.1019; Found: 192.1026. [*α*]<sub>D</sub><sup>24</sup> = -2.2 (*c* = 0.9, MeOH). m. p. 198-199 °C. The enantiomeric excess was determined by chiral HPLC analysis: Chiralcel IA 4.6 mm x 250 mm, hexanes:*i*-PrOH = 95:5, 1.0 mL/min, 210 nm, *t<sub>R</sub>* = 67.5 min (major) and 80.1 min (minor).

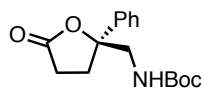

**(S)-tert-butyl((5-oxo-2-phenyltetrahydrofuran-2-yl)methyl)carbamate (6)**

A mixture of **4a** (56 mg, 0.26 mmol, 1.0 equiv, 89% ee), di-*tert*-butyl dicarbonate (84 mg, 0.39 mmol, 1.5 equiv) and 5% Pd/C (5 mg) in THF (1.5 mL) was stirred at room temperature (25 °C) under H<sub>2</sub> atmosphere for 15 h. The reaction mixture was then concentrated *in vacuo*. The residue was purified by silica gel flash column chromatography (hexanes: ethyl acetate = 10:1 to 1:1) to afford **6** (66 mg, 88% yield, 89% ee) as a colorless sticky oil. <sup>1</sup>H NMR (400 MHz, CDCl<sub>3</sub>) δ 7.37-7.29 (m, 5 H), 4.91 (br, 1 H), 3.71 (dd, *J* = 14.8 Hz, 7.6 Hz, 1 H), 3.42 (dd, *J* = 14.8 Hz, 5.2 Hz, 1 H), 2.67-2.33 (m, 4 H), 1.39 (s, 9 H); <sup>13</sup>C NMR (100 MHz, CDCl<sub>3</sub>) δ 176.5, 156.2, 141.1, 128.8, 128.2, 124.8, 89.1, 80.0, 49.3, 31.2, 28.8, 28.3; IR (film)  $\nu_{\max}$  1774, 1709, 1508, 1365, 1245, 1163, 1115, 1092, 1069, 912, 730, 700 cm<sup>-1</sup>; R<sub>f</sub>(hexanes: ethyl acetate = 2:1) = 0.2; Anal. Calcd. For C<sub>16</sub>H<sub>21</sub>NO<sub>4</sub>: C, 65.96; H, 7.27. Found: C, 65.84; H, 7.31. [ $\alpha$ ]<sub>D</sub><sup>24</sup> = -36.1 (*c* = 1, CHCl<sub>3</sub>). The enantiomeric excess was determined by chiral HPLC analysis: Chiralcel OJ-H 4.6 mm x 250 mm, hexanes:*i*-PrOH = 90:10, 1.0 mL/min, 210 nm, *t*<sub>R</sub> = 8.2 min (major) and 7.3 min (minor).

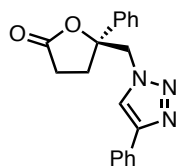

**(S)-5-phenyl-5-((4-phenyl-1H-1,2,3-triazol-1-yl)methyl)dihydrofuran-2(3H)-one (7)**

To a mixture of **4a** (1.0 equiv, 22 mg, 0.1 mmol), phenyl acetylene (1.1 equiv, 11 mg, 0.11 mmol) in H<sub>2</sub>O/*t*-BuOH (1 mL/1 mL) was added CuSO<sub>4</sub>•5H<sub>2</sub>O (0.4 equiv, 10 mg) and sodium ascorbate (0.8 equiv, 16 mg). The resulting mixture was stirred at room temperature for 17 h before diluted with ethyl acetate (5 mL), saturated aqueous EDTA solution (0.2 mL) and water (5 mL). The aqueous layer was extracted with ethyl acetate (5 mL × 3). The combined organic layers were dried over Na<sub>2</sub>SO<sub>4</sub>, filtered through a short silica gel plug, and concentrated *in vacuo*. The residue was triturated with hexanes to afford **7** as a white solid (31 mg, 96% yield, 89% ee). <sup>1</sup>H NMR (400 MHz, CDCl<sub>3</sub>) δ 7.85 (s, 1 H), 7.81 (d, *J* = 7.2 Hz, 1 H), 7.45-7.32 (m, 8 H), 4.88 (d, *J* = 14.8 Hz, 1 H), 4.69 (d, *J* = 14.8 Hz, 1 H), 2.70 (ddd, *J* = 13.2, 9.6, 8.0 Hz, 1 H), 2.52 (ddd, *J* = 13.2, 10.0, 5.6 Hz, 1 H), 2.39 (ddd, *J* = 17.6, 9.6, 8.0 Hz, 1 H), 2.09 (ddd, *J* = 17.6, 10.0, 5.6 Hz, 1 H); <sup>13</sup>C NMR (100 MHz, CDCl<sub>3</sub>) δ 175.3, 148.4, 139.7, 130.2, 129.2, 129.1, 129.0, 128.5, 126.0, 124.8, 121.4, 87.0, 58.5, 31.3, 28.1; IR (film)  $\nu_{\max}$  1777, 1738, 1449, 1365, 1228, 1217, 1147, 931, 764, 697 cm<sup>-1</sup>; R<sub>f</sub>(hexanes: ethyl acetate = 2:1) = 0.1; HRMS: [M+H]<sup>+</sup> Calcd. For C<sub>19</sub>H<sub>18</sub>N<sub>3</sub>O<sub>2</sub>: 320.1394; Found: 320.1373. [ $\alpha$ ]<sub>D</sub><sup>24</sup> = -0.6 (*c* = 0.5, CHCl<sub>3</sub>). m. p. 151-152 °C. The enantiomeric excess was

determined by chiral HPLC analysis: Chiralcel IA 4.6 mm x 250 mm, hexanes:*i*-PrOH = 85:15, 1.0 mL/min, 210 nm,  $t_R$  = 27.1 min (major) and 20.5 min (minor).

#### Trisubstituted Alkene Substrates as Mechanistic Probes (Scheme 4)

**Caution:** Proper safety precautions should be followed. This reaction should be carried out behind a blast shield and only on a small scale. It should be noted that while no incident occurred during this study, azides are potentially hazardous compounds and adequate safety measures should be taken.

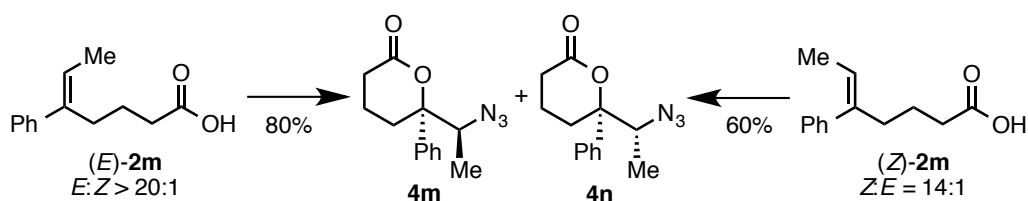

| substrate       | d.r. <sup>b</sup> | 4m                  | 4n                  | ratio of stereoisomers<br>4m : ent-4m : 4n : ent-4n |
|-----------------|-------------------|---------------------|---------------------|-----------------------------------------------------|
|                 |                   | ee [%] <sup>b</sup> | ee [%] <sup>b</sup> |                                                     |
| ( <i>E</i> )-2m | 10 : 1            | 12                  | 93                  | 51.1 : 40.0 : 8.6 : 0.3                             |
| ( <i>Z</i> )-2m | 10 : 1            | 11                  | 93                  | 50.6 : 40.3 : 8.8 : 0.3                             |

**Reaction with (*Z*)-2m:** An oven-dried 20 × 125 mm re-sealable test tube (Fisher Scientific, Cat. #1495937) equipped with a Teflon-coated magnetic stir bar was charged with tetrakis(acetonitrile)copper(I) hexafluorophosphate (3.8 mg, 0.01 mmol, 0.1 equiv), 2,2'-isopropylidenebis[(4*S*)-4-*tert*-butyl-2-oxazoline] (**L**) (3.0 mg, 0.01 mmol, 0.1 equiv) and (*Z*)-2m (0.10 mmol, 1.0 equiv). The reaction tube was sealed with a septum screw-cap (10/90, Teflon/SIL, National Scientific) and connected to a Schlenk line. The reaction tube was then briefly evacuated and backfilled with argon (this sequence was repeated a total of two times). The septum screw-cap was removed, (diacetoxyiodo)benzene (80 mg, 0.25 mmol, 2.5 equiv, dried under high vacuum for 2 h in advance.) was added into the tube quickly and the tube was sealed again with the septum screw-cap. The reaction tube was connected to a Schlenk line. The reaction tube was then briefly evacuated and backfilled with argon (this sequence was repeated a total of three times). The reaction tube was cooled to -78 °C. At the same

temperature, without stirring, anhydrous diethyl ether (6 mL) was added to the tube via syringe followed by trimethylsilyl azide (32  $\mu$ L, 0.24 mmol, 2.4 equiv). After cooled at -78  $^{\circ}$ C for 2 min, argon pressure was removed. A venting needle was inserted. The reaction mixture was moved to a -10  $^{\circ}$ C bath and stirred at the same temperature for 16 h. The reaction was quenched with saturated aqueous sodium bicarbonate solution (6 mL). The aqueous layer was separated and extracted with diethyl ether (5 mL  $\times$  3). The combined organic layers was concentrated *in vacuo*. Phenanthrene (9.0 mg) was added and the crude product was analyzed by  $^1$ H NMR spectroscopy. The total yield of **4m** and **4n** was 60% as determined by  $^1$ H NMR spectroscopy.

A small portion of the crude product was then subjected to a rapid TLC purification to remove the non-polar components (internal standard and iodobenzene) as well as the polar carboxylic acid derivatives. The residue ( $R_f$  (toluene: ethyl acetate = 5:1) between 0.4 and 0.8) was analyzed by chiral HPLC. Chiralcel OD-H/OD-H 4.6 mm  $\times$  250 mm, pentane: EtOH = 97:3, 0.8 mL/min, 210 nm. **4m** (11% ee):  $t_R$  = 35.5 min (major) and 37.6 min (minor). **4n** (93% ee):  $t_R$  = 33.5 min (major) and 44.8 min (major). d.r.(**4m**: **4n**) = 10:1. Stereoisomer ratio calculated: (**4m** + *ent-4m*):(**4n** + *ent-4n*) = 51:49.

The rest of the crude material was purified by preparative thin-layer chromatography to afford an inseparable mixture of **4m** and **4n**. IR (film)  $\nu_{\max}$  2094, 1739, 1447, 1365, 1230, 1217, 1033, 760, 702  $\text{cm}^{-1}$ ; HRMS:  $[M+NH_4]^+$  Calcd. For  $C_{13}H_{19}N_4O_2$ : 263.1503; Found: 263.1507.  $[\alpha]_D^{24}$  = +1.2 ( $c$ = 0.8,  $\text{CHCl}_3$ ).

Major diastereomer: **(S)-6-((S)-1-azidoethyl)-6-phenyltetrahydro-2H-pyran-2-one (4m)**  $^1$ H NMR (400 MHz,  $\text{CDCl}_3$ )  $\delta$  7.43-7.31 (m, 5 H), 3.78 (q,  $J$  = 6.8 Hz, 1 H), 2.56 (dtd,  $J$  = 14.4 Hz, 4.4 Hz, 0.8 Hz, 1 H), 2.46 (ddd,  $J$  = 18.4 Hz, 9.2 Hz, 7.6 Hz, 1 H), 2.37 (dddd,  $J$  = 18.4 Hz, 7.2 Hz, 3.6 Hz, 0.8 Hz, 1 H), 2.06 (ddd,  $J$  = 14.4 Hz, 12.4 Hz, 4.4 Hz, 1 H), 1.85 (m, 1 H), 1.62 (m, 1 H), 1.11 (d,  $J$  = 6.8 Hz, 3 H);  $^{13}\text{C}$  NMR (100 MHz,  $\text{CDCl}_3$ )  $\delta$  170.6, 138.8, 128.8, 128.5, 126.5, 88.5, 65.0, 28.3, 28.0, 16.2, 14.0.

Minor diastereomer: **(S)-6-((R)-1-azidoethyl)-6-phenyltetrahydro-2H-pyran-2-one (4n)**  $^1$ H NMR (400 MHz,  $\text{CDCl}_3$ ):  $\delta$  3.57 (q,  $J$  = 6.8 Hz, 1 H), 2.22 (td,  $J$  = 13.6 Hz, 3.6 Hz, 1 H), 1.17 (d,  $J$  = 6.8 Hz, 3 H);  $^{13}\text{C}$  NMR (100 MHz,  $\text{CDCl}_3$ )  $\delta$  170.8, 140.6, 129.1, 128.2, 125.5, 88.8, 64.1, 29.8, 29.6, 16.2, 13.0.



The relative stereochemistry of **4m** and **4n** were assigned based on comparison with known compounds.<sup>6</sup>

**Reaction with (E)-2m:** Following the same procedure for the reaction with (E)-**2m** described above, an over-dried 20 × 125 mm re-sealable test tube (Fisher Scientific, Cat. #1495937) equipped with a Teflon-coated magnetic stir bar was charged with tetrakis(acetonitrile)copper(I) hexafluorophosphate (3.8 mg, 0.01 mmol, 0.1 equiv), 2,2'-isopropylidenebis[(4S)-4-tert-butyl-2-oxazoline] (**L**) (3.0 mg, 0.01 mmol, 0.1 equiv) and (E)-**2m** (0.10 mmol, 1.0 equiv). The reaction tube was sealed with a septum screw-cap (10/90, Teflon/SIL, National Scientific) and connected to a Schlenk line. The reaction tube was then briefly evacuated and backfilled with argon (this sequence was repeated a total of two times). The septum screw-cap was removed, (diacetoxyiodo)benzene (80 mg, 0.25 mmol, 2.5 equiv, dried under high vacuum for 2 h in advance.) was added into the tube quickly and the tube was sealed again with the septum screw-cap. The reaction tube was connected to a Schlenk line. The reaction tube was then briefly evacuated and backfilled with argon (this sequence was repeated a total of three times). The reaction tube was cooled to -78 °C. At the same temperature, without stirring, anhydrous diethyl ether (6 mL) was added to the tube via syringe followed by trimethylsilyl azide (32 µL, 0.24 mmol, 2.4 equiv). After cooled at -78 °C for 2 min, argon pressure was removed. A venting needle was inserted. The reaction mixture was moved to a -10 °C bath and stirred at the same temperature for 16 h. The reaction was quenched with saturated aqueous sodium bicarbonate solution (6 mL). The aqueous layer was separated and extracted with diethyl ether (5 mL × 3). The combined organic layers was concentrated *in vacuo*. Phenanthrene (9.0 mg) was added and the crude product was analyzed by <sup>1</sup>H NMR spectroscopy. The total yield of **4m** and **4n** was 80% as determined by <sup>1</sup>H NMR spectroscopy.

A small portion of the crude product was then subjected to a rapid TLC purification to remove the non-polar components (internal standard and iodobenzene) as well as the polar carboxylic acid derivatives. The residue (*R<sub>f</sub>* (toluene: ethyl acetate = 5:1) between 0.4 and 0.8) was analyzed by chiral HPLC. **4m**:12% ee; **4n**: 93% ee; d.r.(**4m**: **4n**) = 10:1. Stereoisomer ratio calculated: (**4m** + *ent-4m*):(**4n** + *ent-4n*) = 51:49.

*Additional Evidence Consistent with the Proposed Mechanism (footnote 13)*

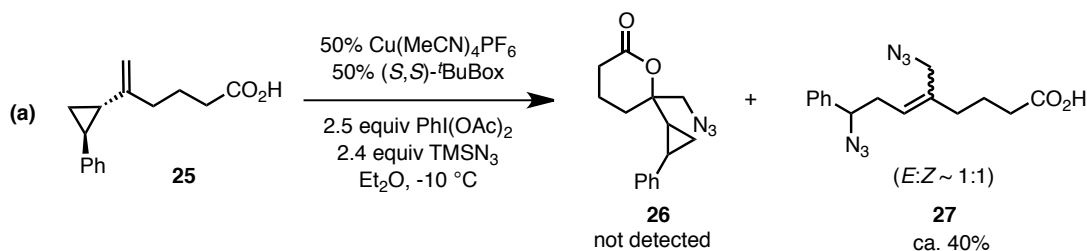

(a) Radical clock substrate **25** was treated with PhI(OAc)<sub>2</sub> and TMSN<sub>3</sub> in the presence of 0.5 equiv of the copper catalyst and the ligand using a protocol similar to the general procedure A described before. The oxyazidation product **26** was not observed. Cyclopropane ring-opening product **27** (1:1 mixture of alkene geometric isomers, chromatographically inseparable from other carboxylic acid derivatives in the crude reaction mixture) was detected by <sup>1</sup>H NMR analysis of the crude reaction mixture.

**8-azido-5-(azidomethyl)-8-phenyloct-5-enoic acid (27)** <sup>1</sup>H NMR (400 MHz, CDCl<sub>3</sub>): δ 5.48 and 5.46 (t, *J* = 7.2 Hz, 1 H), 4.50 and 4.48 (t, *J* = 6.8 Hz, 1 H), 3.73 and 3.69 (s, 2 H), 2.64-2.50 (m, 2 H), 2.32 (m, 2 H), 2.17-2.09 (m, 2 H), 1.79-1.62 (m, 2 H); HRMS (DART, Negative): [M-H]<sup>-</sup> Calcd. for C<sub>15</sub>H<sub>17</sub>N<sub>6</sub>O<sub>2</sub>: 313.1418; Found: 313.1420.

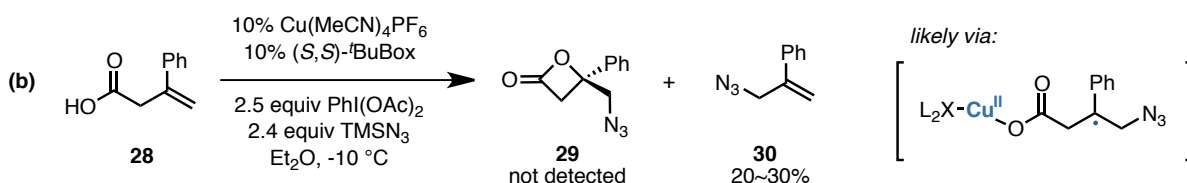

(b) 3-Phenylbut-3-enoic acid (**28**) was treated with PhI(OAc)<sub>2</sub> and TMSN<sub>3</sub> in the presence of 0.1 equiv of the copper catalyst and the ligand using a protocol similar to the general procedure described before. The oxyazidation product **29** was not observed, while (3-azidoprop-1-en-2-yl)benzene (**30**)<sup>7</sup> was detected by <sup>1</sup>H NMR analysis of the crude reaction mixture. It is likely that **30** was formed via the copper-mediated decarboxylative elimination of the β-radical-carboxylate intermediate<sup>8</sup> derived from the azidyl radical addition.

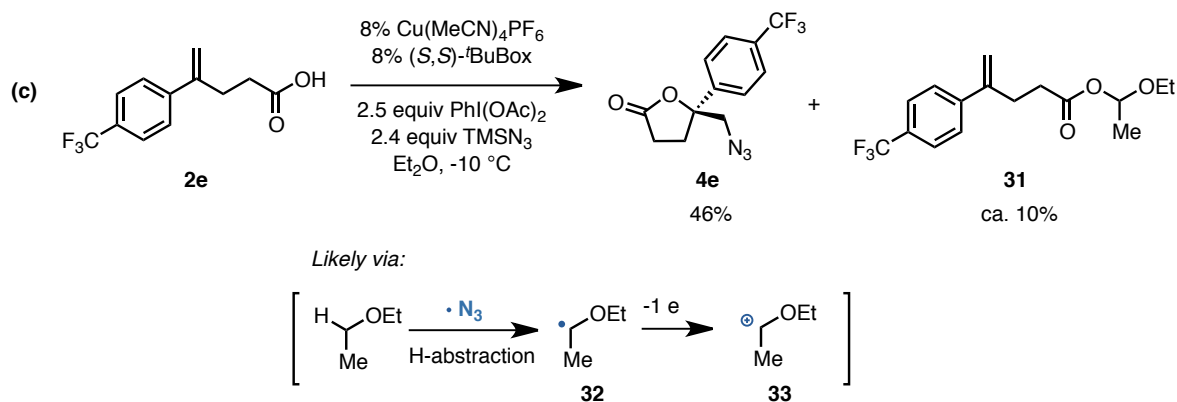

(c) In the oxyazidation reaction of an electron-deficient styrene derivative **2e**, side product **31** was identified by <sup>1</sup>H NMR analysis of the crude reaction mixture. (characteristic <sup>1</sup>H NMR signals (400 MHz, CDCl<sub>3</sub>): δ 5.97 (q, *J* = 5.2 Hz, 1 H); chromatographically inseparable from other acetal derivatives in the crude reaction mixture) It is likely that **31** was formed via the nucleophilic trapping of a cationic intermediate **33** derived from the hydrogen-abstraction of a solvent molecule by an azidyl radical followed by one-electron oxidation.<sup>9</sup>

### Enantioselective Oxysulfonylation:

*General procedure B for optimization (Table 2):* An oven-dried Fisher Scientific 13×100 mm re-sealable test tube equipped with a Teflon-coated magnetic stir bar was charged with tetrakis(acetonitrile)copper(I) hexafluorophosphate (3.7 mg, 0.010 mmol, 0.10 equiv), 2,2'-isopropylidenebis[(4*S*)-4-tert-butyl-2-oxazoline] (**L**) (2.9 mg, 0.010 mmol, 0.10 equiv), *p*-tosyl chloride **10a** (0.11 mmol, 1.1 equiv), base and **2a** (0.10 mmol, 1.0 equiv). The reaction tube was sealed with a septum screw-cap (Thermo Scientific ASM PHN CAP w/PTFE/SIL, cat. #03378316). The reaction tube was connected to a Schlenk line through a needle. The reaction tube was then briefly evacuated and backfilled with argon (this sequence was repeated a total of three times). Anhydrous EtOAc (2 mL) was added to the tube via syringe and the argon pressure was removed. The reaction mixture was stirred at room temperature for 16 h. The reaction mixture was diluted with saturated aqueous sodium bicarbonate solution (4 mL) and ethyl acetate (2 mL). The aqueous layer was separated and extracted with ethyl acetate (4 mL×3). The combined organic layers were concentrated *in vacuo*. The residue was analyzed by <sup>1</sup>H NMR spectroscopy using phenanthrene as an internal standard. The residue was purified by

thin-layer chromatography to afford the oxysulfonylation product **8a**, which was analyzed by chiral HPLC.

*General procedure C for substrate scope (Scheme 4):* An oven-dried Fisher Scientific 20×150 mm re-sealable test tube equipped with a Teflon-coated magnetic stir bar was charged with tetrakis(acetonitrile)copper(I) hexafluorophosphate (18.7 mg, 0.05 mmol, 0.10 equiv), 2,2'-isopropylidenebis[(4*S*)-4-tert-butyl-2-oxazoline] (**L**) (14.7 mg, 0.05 mmol, 0.10 equiv), arylsulfonyl chloride **10** (0.55 mmol, 1.1 equiv), silver carbonate (82.8 mg, 0.30 mmol, 0.60 equiv) and **2** (0.50 mmol, 1.0 equiv). The reaction tube was sealed with a septum screw-cap (10/90, Teflon/SIL, National Scientific) and connected to a Schlenk line. The reaction tube was then briefly evacuated and backfilled with argon (this sequence was repeated a total of three times). Anhydrous EtOAc (8 mL) was added to the tube via syringe and the argon pressure was removed. The reaction mixture was stirred at room temperature for 16 h. The reaction mixture was diluted with saturated aqueous sodium bicarbonate solution (8 mL) and ethyl acetate (4 mL). The aqueous layer was separated and extracted with ethyl acetate (8 mL×3). The combined organic layers was concentrated *in vacuo*. The residue was then purified by silica gel flash column chromatography (Et<sub>2</sub>O/Hexanes or EtOAc/Hexanes) to afford the oxysulfonylation product **8**.

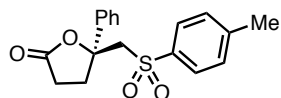

**(S)-5-phenyl-5-(tosylmethyl)dihydrofuran-2(3H)-one (8a)** Following

general procedure C, the title compound was synthesized from 4-phenylpent-4-enoic acid (**2a**) (0.50 mmol, 88 mg) and tosyl chloride (**10a**) (0.55 mmol, 105 mg). The product was purified by silica gel flash column chromatography (Et<sub>2</sub>O/hexanes = 1:1 to 3:1) to afford **8a** (149.8 mg, 91% yield, 74% ee). <sup>1</sup>H NMR (400 MHz, CDCl<sub>3</sub>) δ 7.69 (d, *J* = 8.0 Hz, 2 H), 7.35-7.28 (m, 7 H), 3.77 (d, *J* = 14.8 Hz, 1 H), 3.72 (d, *J* = 14.8 Hz, 1 H), 3.35 (ddd, *J* = 12.8 Hz, 10.0 Hz, 8.0 Hz, 1 H), 2.84 (ddd, *J* = 17.6 Hz, 10.0 Hz, 4.8 Hz, 1 H), 2.63 (ddd, *J* = 12.8 Hz, 10.0 Hz, 4.8 Hz, 1 H), 2.48 (ddd, *J* = 17.6 Hz, 8.0 Hz, 10.0 Hz, 1 H), 2.42 (s, 3 H); <sup>13</sup>C NMR (100 MHz, CDCl<sub>3</sub>) δ 175.4, 145.0, 142.0, 137.6, 128.9, 128.0, 124.6, 4.8, 65.1, 32.6, 28.3, 21.7; IR (film) *v*<sub>max</sub> 1776, 1596, 1449, 1318, 1285, 1173, 1137, 1084, 1049, 841 cm<sup>-1</sup>; R<sub>f</sub>(hexanes: ethyl ether = 1:2) = 0.3; HRMS: [M+NH<sub>4</sub>]<sup>+</sup> Calcd. For C<sub>18</sub>H<sub>22</sub>NO<sub>4</sub>S: 348.1264; Found: 348.1248. [α]<sub>D</sub><sup>24</sup> = -3.2 (c = 1.5, CHCl<sub>3</sub>). The enantiomeric excess was determined by chiral HPLC analysis: Chiralcel IA 4.6 mm x 250 mm, hexanes:*i*-PrOH = 90:10, 1.0 mL/min, 230 nm, *t*<sub>R</sub> = 34.5 min (minor) and 36.9 min (major).

**(S)-5-(((4-bromophenyl)sulfonyl)methyl)-5-(4-chlorophenyl)dihydrofuran-2(3H)-one (8b)**

Following general procedure C, the title compound was synthesized from 4-(4-chlorophenyl)pent-4-enoic acid (**2c**) (0.50 mmol, 105 mg) and 4-bromobenzenesulfonyl chloride (**10b**) (0.55 mmol, 140.5 mg). The product was purified by silica gel flash column chromatography (Et<sub>2</sub>O/hexanes = 3:1 to 7:1 to EtOAc/hexanes = 1:1) to afford **8b** (204.8 mg, 95% yield, 78% ee). <sup>1</sup>H NMR (400 MHz, CDCl<sub>3</sub>) δ 7.65 (m, 4 H), 7.31 (d, *J* = 8.4 Hz, 2 H), 7.23 (d, *J* = 8.4 Hz, 2 H), 3.73 (m, 2 H), 3.27 (ddd, *J* = 12.8 Hz, 9.6 Hz, 8.4 Hz, 1 H), 2.82 (ddd, *J* = 17.6 Hz, 9.6 Hz, 4.4 Hz, 1 H), 2.61 (ddd, *J* = 12.8 Hz, 9.6 Hz, 4.4 Hz, 1 H), 2.49 (ddd, *J* = 17.6 Hz, 8.4 Hz, 9.6 Hz, 1 H); <sup>13</sup>C NMR (100 MHz, CDCl<sub>3</sub>) δ 174.9, 139.8, 139.3, 135.0, 132.7, 129.6, 129.2, 126.3, 84.1, 65.1, 33.1, 28.1; IR (film) ν<sub>max</sub> 1776, 1572, 1326, 1140, 1067, 1137, 997, 812 cm<sup>-1</sup>; R<sub>f</sub>(hexanes: ethyl acetate = 1:1) = 0.2; HRMS: [M+NH<sub>4</sub>]<sup>+</sup> Calcd. For C<sub>17</sub>H<sub>18</sub>ClBrNO<sub>4</sub>S: 447.9808; Found: 447.9827. [α]<sub>D</sub><sup>24</sup> = +12.9 (c = 1, CHCl<sub>3</sub>). The enantiomeric excess was determined by chiral HPLC analysis: Chiralcel IA 4.6 mm x 250 mm, hexanes:*i*-PrOH = 85:15, 1.0 mL/min, 230 nm, t<sub>R</sub> = 35.0 min (minor) and 68.4 min (major).

**(S)-5-(3-acetylphenyl)-5-(((4-(trifluoromethyl)phenyl)sulfonyl)methyl)dihydrofuran-2(3H)-one (8c)**

An oven-dried Fisher Scientific 20x150 mm re-sealable test tube equipped with a Teflon-coated magnetic stir bar was charged with tetrakis(acetonitrile)copper(I) hexafluorophosphate (18.7 mg, 0.05 mmol, 0.10 equiv), 2,2'-isopropylidenebis[(4*S*)-4-*tert*-butyl-2-oxazoline] (**L**) (14.7 mg, 0.05 mmol, 0.10 equiv), silver carbonate (82.8 mg, 0.60 mmol, 1.2 equiv) and **2h** (109 mg, 0.50 mmol, 1.0 equiv). The reaction tube was sealed with a septum screw-cap (10/90, Teflon/SIL, National Scientific) and connected to a Schlenk line. The reaction tube was then briefly evacuated and backfilled with argon (this sequence was repeated a total of three times). A solution of 4-trifluoromethylbenzenesulfonyl chloride (**10c**) (134 mg, 0.55 mmol, 1.1 equiv) in anhydrous EtOAc (8 mL) was added to the tube via syringe under argon. The argon pressure was removed and the reaction mixture was stirred at room temperature for 16 h. The reaction mixture was diluted with saturated aqueous sodium bicarbonate solution (8 mL) and ethyl acetate (4 mL). The aqueous layer was separated and extracted with ethyl acetate (8 mLx3). The combined organic layers was concentrated *in vacuo*. The residue purified by silica gel flash column chromatography (Et<sub>2</sub>O/hexanes = 3:1 to

EtOAc/hexanes = 1:1) to afford **8c** (142.2 mg, 67% yield, 81% ee).  $^1\text{H}$  NMR (400 MHz,  $\text{CDCl}_3$ )  $\delta$  7.92 (d,  $J$  = 8.4 Hz, 2 H), 7.84 (m, 2 H), 7.75 (d,  $J$  = 8.4 Hz, 2 H), 7.56 (m, 1 H), 7.45 (m, 1 H), 3.86 (d,  $J$  = 15.2 Hz, 1 H), 3.83 (d,  $J$  = 15.2 Hz, 1 H), 3.28 (ddd,  $J$  = 12.8 Hz, 9.6 Hz, 8.0 Hz, 1 H), 2.85 (ddd,  $J$  = 17.6 Hz, 9.6 Hz, 4.8 Hz, 1 H), 2.66 (ddd,  $J$  = 12.8 Hz, 9.6 Hz, 4.8 Hz, 1 H), 2.57 (s, 3 H), 2.50 (ddd,  $J$  = 17.6 Hz, 8.0 Hz, 9.6 Hz, 1 H);  $^{13}\text{C}$  NMR (100 MHz,  $\text{CDCl}_3$ )  $\delta$  197.3, 174.8, 143.7, 142.1, 137.7, 135.6 (q,  $J_{\text{CF}}$  = 33 Hz), 129.5, 129.3, 128.9, 128.8, 126.5 (q,  $J_{\text{CF}}$  = 4 Hz), 124.3, 123.1 (q,  $J_{\text{CF}}$  = 272 Hz), 84.1, 64.9, 33.4, 28.0, 26.8;  $^{19}\text{F}$  NMR (376 MHz,  $\text{CDCl}_3$ )  $\delta$  -63.3 (s); IR (film)  $\nu_{\text{max}}$  1782, 1683, 1403, 1320, 1167, 1132, 1061, 914, 844  $\text{cm}^{-1}$ ;  $R_f$ (hexanes: ethyl acetate = 1:1) = 0.2; HRMS:  $[\text{M}+\text{NH}_4]^+$  Calcd. For  $\text{C}_{20}\text{H}_{21}\text{F}_3\text{NO}_5\text{S}$ : 444.1087; Found: 444.1090.  $[\alpha]_{\text{D}}^{24}$  = -0.8 ( $c$  = 0.9,  $\text{CHCl}_3$ ). The enantiomeric excess was determined by chiral HPLC analysis: Chiralcel IA 4.6 mm x 250 mm, hexanes:*i*-PrOH = 85:15, 1.0 mL/min, 230 nm,  $t_R$  = 51.6 min (minor) and 55.5 min (major).

### ***Enantioselective oxyarylation***

**Caution:** Proper safety precautions should be followed. This reaction should be carried out behind a blast shield and only on a small scale. It should be noted that while no incident occurred during this study, aryldiazonium salts are potentially hazardous compounds and adequate safety measures should be taken.

*General procedure D for the enantioselective oxyarylation (Scheme 5):* An oven-dried Fisher Scientific 20x150 mm re-sealable test tube equipped with a Teflon-coated magnetic stir bar was charged with tetrakis(acetonitrile)copper(I) hexafluorophosphate (22.4 mg, 0.06 mmol, 0.12 equiv), 2,2-isopropylidenebis[(4*S*)-4-*tert*-butyl-2-oxazoline] (**L**) (14.7 mg, 0.05 mmol, 0.1 equiv), aryldiazonium tetrafluoroborate **11** (1.0 mmol, 2.0 equiv) and **2** (0.50 mmol, 1.0 equiv). The tube was then sealed with a septum screw-cap (10/90, Teflon/SIL, National Scientific) and connected to a Schlenk line. The vessel was briefly evacuated and backfilled with argon (this sequence was repeated a total of three times). Anhydrous EtOAc (8 mL) was added to the tube via syringe followed by 2,6-di-*tert*-butylpyridine (224  $\mu\text{L}$ , 2.0 equiv). Argon pressure was removed. A venting needle was inserted. The reaction mixture was stirred at room temperature (25  $^{\circ}\text{C}$ ) for 16 h. The reaction mixture was carefully diluted with saturated aqueous sodium bicarbonate solution (8 mL) and EtOAc (4 mL). The aqueous layer was separated and extracted with EtOAc (8 mLx3).

The combined organic layers were concentrated *in vacuo*. The residue was then purified by silica gel flash column chromatography (Et<sub>2</sub>O/Hexanes or EtOAc/Hexanes) to afford the oxyarylation product **9**.

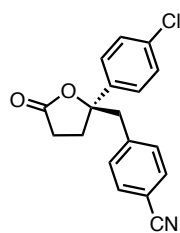

**(R)-4-((2-(4-chlorophenyl)-5-oxotetrahydrofuran-2-yl)methyl)benzonitrile**

**(9a)** Following general procedure D, the title compound was synthesized from 4-(4-chlorophenyl)pent-4-enoic acid (**2c**) (105 mg, 0.50 mmol) and 4-cyanophenyldiazonium tetrafluoroborate (217 mg). The product was purified by silica gel flash column chromatography (Et<sub>2</sub>O/hexanes = 2:1 to EtOAc/hexanes

= 2:1) to afford **9a** (115.1 mg, 74% yield, 73% ee) as a pale yellow oil. <sup>1</sup>H NMR (400 MHz, CDCl<sub>3</sub>) δ 7.49 (d, *J* = 8.4 Hz, 2 H), 7.30 (d, *J* = 8.8 Hz, 2 H), 7.16 (d, *J* = 8.8 Hz, 2 H), 7.11 (d, *J* = 8.4 Hz, 2 H), 3.26 (d, *J* = 14.4 Hz, 1 H), 3.22 (d, *J* = 14.4 Hz, 1 H), 2.55-2.50 (m, 2 H), 2.42-2.38 (m, 2 H); <sup>13</sup>C NMR (100 MHz, CDCl<sub>3</sub>) δ 175.5, 140.6, 140.3, 134.2, 132.1, 131.4, 128.9, 126.4, 118.7, 111.3, 87.9, 48.6, 34.3, 28.5; IR (film) ν<sub>max</sub> 1742, 1434, 1366, 1229, 1217 cm<sup>-1</sup>; R<sub>f</sub>(hexanes: ethyl acetate = 1:1) = 0.3; HRMS: [M+NH<sub>4</sub>]<sup>+</sup> Calcd. For C<sub>18</sub>H<sub>18</sub>ClN<sub>2</sub>O<sub>2</sub>: 329.1051; Found: 329.1071. [α]<sub>D</sub><sup>24</sup> = +48.8 (c = 1.1, CHCl<sub>3</sub>). The enantiomeric excess was determined by chiral HPLC analysis: Chiralcel OD-H 4.6 mm x 250 mm, hexanes:*i*-PrOH = 90:10, 1.0 mL/min, 230 nm, t<sub>R</sub> = 34.5 min (major) and 39.5 min (minor).

**(R)-ethyl-4-((2-(4-cyanophenyl)-5-oxotetrahydrofuran-2-yl)methyl)benzoate (9b)** Following general procedure D, the title compound was synthesized from 4-(4-cyanophenyl)pent-4-enoic acid (**2d**) (100 mg, 0.50 mmol) and 4-ethoxycarbonylphenyldiazonium tetrafluoroborate (264 mg). The product was purified by silica gel flash column chromatography (Et<sub>2</sub>O/hexanes = 2:1 to EtOAc/hexanes = 1:1) to

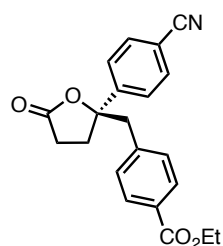

afford **9b** (132.0 mg, 76% yield, 71% ee) as a pale yellow oil. <sup>1</sup>H NMR (400 MHz, CDCl<sub>3</sub>) δ 7.91 (d, *J* = 8.0 Hz, 2 H), 7.64 (d, *J* = 8.8 Hz, 2 H), 7.40 (d, *J* = 8.8 Hz, 2 H), 7.11 (d, *J* = 8.0 Hz, 2 H), 4.36 (q, *J* = 7.2 Hz, 2 H), 3.27 (d, *J* = 14.0 Hz, 1 H), 3.21 (d, *J* = 14.0 Hz, 1 H), 2.62 (ddd, *J* = 12.8 Hz, 10.0 Hz, 7.2 Hz, 1 H), 2.51-2.33 (m, 2 H), 2.26 (ddd, *J* = 17.2 Hz, 9.6 Hz, 6.0 Hz, 1 H); <sup>13</sup>C NMR (100 MHz, CDCl<sub>3</sub>) δ 175.3, 166.4, 148.1, 139.3, 132.6, 130.6, 129.9, 129.7, 125.8, 118.4, 112.2, 87.9, 61.2, 48.5, 33.6, 28.5, 14.5; IR (film) ν<sub>max</sub> 2228, 1774, 1738, 1717, 1365, 1277, 128, 1217, 1104, 1021 cm<sup>-1</sup>; R<sub>f</sub>(hexanes: ethyl acetate = 1:1) = 0.1; HRMS: [M+NH<sub>4</sub>]<sup>+</sup> Calcd. For C<sub>21</sub>H<sub>23</sub>N<sub>2</sub>O<sub>4</sub>: 367.1652;

Found: 367.1665.  $[\alpha]_D^{24} = +11.3$  ( $c = 1$ ,  $\text{CHCl}_3$ ). The enantiomeric excess was determined by chiral HPLC analysis: Chiralcel AD-H 4.6 mm x 250 mm, hexanes:*i*-PrOH = 85:15, 1.0 mL/min, 230 nm,  $t_R = 20.3$  min (major) and 29.1 min (minor).

**(R)-4-((5-oxo-2-(4-(trifluoromethyl)phenyl)tetrahydrofuran-2-yl)methyl)benzonitrile (9c)**

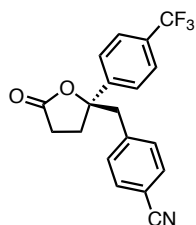

Following general procedure D, the title compound was synthesized from 4-(4-trifluoromethylphenyl)pent-4-enoic acid (**2e**) (122 mg, 0.50 mmol) and 4-cyanophenyldiazonium tetrafluoroborate (217 mg). The product was purified by silica gel flash column chromatography ( $\text{Et}_2\text{O}$ /hexanes = 2:1 to  $\text{EtOAc}$ /hexanes = 1:1) to afford **9c** (90.4 mg, 52% yield, 76% ee) as a pale yellow oil.  $^1\text{H}$  NMR (400 MHz,  $\text{CDCl}_3$ )  $\delta$  7.61 (d,  $J = 8.4$  Hz, 2 H), 7.51 (d,  $J = 8.4$  Hz, 2 H), 7.37 (d,  $J = 8.4$  Hz, 2 H), 7.14 (d,  $J = 8.4$  Hz, 2 H), 3.30 (d,  $J = 14.4$  Hz, 1 H), 3.26 (d,  $J = 14.4$  Hz, 1 H), 2.63-2.51 (m, 2 H), 2.47-2.33 (m, 2 H);  $^{13}\text{C}$  NMR (100 MHz,  $\text{CDCl}_3$ )  $\delta$  175.3, 146.2, 140.0, 132.2, 131.4, 130.6 (q,  $J_{\text{CF}} = 32$  Hz), 125.8 (q,  $J_{\text{CF}} = 3$  Hz), 125.4, 123.9 (q,  $J_{\text{CF}} = 270$  Hz), 118.7, 111.5, 87.8, 48.5, 34.2, 28.4;  $^{19}\text{F}$  NMR (376 MHz,  $\text{CDCl}_3$ )  $\delta$  -62.7 (s); IR (film)  $\nu_{\text{max}}$  1738, 1434, 1365, 1229, 1217, 1163  $\text{cm}^{-1}$ ;  $R_f$ (toluene: ethyl acetate = 5:1) = 0.3; HRMS:  $[\text{M}+\text{NH}_4]^+$  Calcd. For  $\text{C}_{19}\text{H}_{18}\text{F}_3\text{N}_2\text{O}_2$ : 363.1315; Found: 363.1332.  $[\alpha]_D^{24} = +8.0$  ( $c = 0.9$ ,  $\text{CHCl}_3$ ). The enantiomeric excess was determined by chiral HPLC analysis: Chiralcel OD-H 4.6 mm x 250 mm, hexanes:*i*-PrOH = 90:10, 1.0 mL/min, 230 nm,  $t_R = 30.3$  min (major) and 37.6 min (minor).

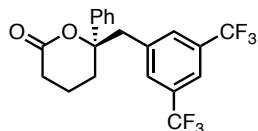

**(R)-6-(3,5-bis(trifluoromethyl)benzyl)-6-phenyltetrahydro-2H-pyran-2-one (9d)**

Following general procedure D, the title compound was synthesized from 5-phenylhex-5-enoic acid (**2i**) (95 mg, 0.50 mmol) and 3,5-bis(trifluoromethyl)phenyldiazonium tetrafluoroborate (328 mg). The product was purified by silica gel flash column chromatography (hexanes: ethyl acetate = 10:1 to 4:1) to afford **9d** (164.9 mg, 82% yield, 56% ee) as a pale yellow oil.  $^1\text{H}$  NMR (400 MHz,  $\text{CDCl}_3$ )  $\delta$  7.70 (s, 1 H), 7.36-7.30 (m, 5 H), 7.19-7.178 (m, 2 H), 3.28 (d,  $J = 14.0$  Hz, 1 H), 3.26 (d,  $J = 14.0$  Hz, 1 H), 2.47-2.33 (m, 3 H), 1.97 (ddd,  $J = 14.4, 12.8, 4.8$  Hz, 1 H), 1.80 (m, 1 H), 1.63 (m, 1 H);  $^{13}\text{C}$  NMR (100 MHz,  $\text{CDCl}_3$ )  $\delta$  170.8, 141.3, 137.7, 131.1 (q,  $J_{\text{CF}} = 33$  Hz), 130.9, 129.0, 128.2, 125.3, 123.3 (q,  $J_{\text{CF}} = 271$  Hz), 120.9 (m), 86.7, 49.9, 31.7, 29.1, 16.2;  $^{19}\text{F}$  NMR (376 MHz,  $\text{CDCl}_3$ )  $\delta$  -62.9 (s); IR (film)  $\nu_{\text{max}}$  1736, 1378, 1275, 1235, 1167, 1125, 1044, 894  $\text{cm}^{-1}$ ;  $R_f$ (toluene: ethyl acetate = 5:1) = 0.6;  $[\text{M}+\text{NH}_4]^+$  Calcd. For  $\text{C}_{20}\text{H}_{20}\text{F}_6\text{NO}_2$ : 420.1393; Found: 420.1370.  $[\alpha]_D^{24} = +2.3$  ( $c = 0.7$ ,



CHCl<sub>3</sub>). The enantiomeric excess was determined by chiral HPLC analysis: Chiralcel OD-H 4.6 mm x 250 mm, hexanes:*i*-PrOH = 90:10, 1.0 mL/min, 230 nm, *t<sub>R</sub>* = 7.1 min (major) and 10.6 min (minor).

### Enantioselective diacyloxylation (Scheme 7)

**Caution:** Proper safety precautions should be followed. This reaction should be carried out behind a blast shield and only on a small scale. It should be noted that while no incident occurred during this study, peroxides are potentially hazardous compounds and adequate safety measures should be taken.

An oven-dried Fisher Scientific 20×150 mm re-sealable test tube equipped with a Teflon-coated magnetic stir bar was charged with tetrakis(acetonitrile)copper(I) hexafluorophosphate (18.7 mg, 0.05 mmol, 0.10 equiv), 2,2'-isopropylidenebis[(4*S*)-4-*tert*-butyl-2-oxazoline] (**L**) (14.7 mg, 0.05 mmol, 0.10 equiv), dibenzoyl peroxide (75%) (244 mg, 0.75 mmol, 1.5 equiv), manganese powder (55 mg, 1.0 mmol, 2.0 equiv) and **2c** (105 mg, 0.50 mmol, 1.0 equiv). The tube was then sealed with a Teflon screw-cap septum (10/90, Teflon/SIL, National Scientific) and connected to a Schlenk line. The vessel was briefly evacuated and backfilled with argon (this sequence was repeated a total of three times). Anhydrous EtOAc (8 mL) was added to the tube via syringe and the argon pressure was removed. A venting needle was inserted. The reaction mixture was stirred at room temperature (25 °C) for 16 h. The reaction mixture was carefully diluted with saturated aqueous sodium bicarbonate solution (8 mL) and EtOAc (4 mL). Internal standard (phenanthrene) was added. The aqueous layer was separated and extracted with EtOAc (8 mL×3). The combined organic layers were concentrated *in vacuo*. The residue was analyzed by <sup>1</sup>H NMR spectroscopy (<sup>1</sup>H NMR yield: **13**: 29%; **14**: 40%). The residue was then purified by silica gel flash column chromatography (hexanes: ethyl acetate = 10:1 to 4:1 to toluene: ethyl acetate = 4:1) to afford **13** (42.5 mg, 26% yield, 65% ee) and **14** (50.8 mg, 35% yield, 66% ee).

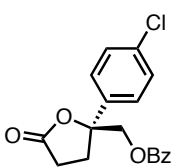

**(S)-(2-(4-Chlorophenyl)-5-oxotetrahydrofuran-2-yl)methyl benzoate (**13**)** <sup>1</sup>H

NMR (400 MHz, CDCl<sub>3</sub>) δ 7.97 (m, 2 H), 7.59 (m, 1 H), 7.47-7.41 (m, 6 H), 4.64 (d, *J* = 12.4 Hz, 1 H), 4.45 (d, *J* = 12.4 Hz, 1 H), 2.82-2.71 (m, 2 H), 2.63-2.45 (m, 2 H); <sup>13</sup>C NMR (100 MHz, CDCl<sub>3</sub>) δ 175.7, 166.0, 138.7, 134.8, 133.73,

129.8, 129.3, 129.2, 128.8, 126.6, 86.6, 69.9, 31.5, 28.9; IR (film) *v*<sub>max</sub> 1779, 1720, 1264, 1111,

1093, 1012, 910  $\text{cm}^{-1}$ ;  $R_f(\text{toluene: ethyl acetate} = 5:1) = 0.4$ ;  $[\text{M}+\text{H}]^+$  Calcd. For  $\text{C}_{18}\text{H}_{16}\text{ClO}_4$ : 331.0732; Found: 331.0750.  $[\alpha]_{\text{D}}^{24} = -16.4$  ( $c = 0.4$ ,  $\text{CHCl}_3$ ). The enantiomeric excess was determined by chiral HPLC analysis: Chiralcel OD-H 4.6 mm x 250 mm, hexanes:*i*-PrOH = 90:10, 1.0 mL/min, 230 nm,  $t_R = 16.8$  min (major) and 31.9 min (minor).

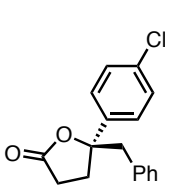

**(R)-5-Benzyl-5-(4-chlorophenyl)dihydrofuran-2(3H)-one (14)**  $^1\text{H}$  NMR (400

MHz,  $\text{CDCl}_3$ )  $\delta$  7.33-7.23 (m, 7 H), 7.08 (m, 2 H), 3.22 (d,  $J = 14.0$  Hz, 1 H), 3.10

(d,  $J = 14.0$  Hz, 1 H), 2.57 (ddd,  $J = 12.8, 10.4, 7.2$  Hz, 1 H), 2.44-2.28 (m, 2 H),

2.11 (m, 1 H);  $^{13}\text{C}$  NMR (100 MHz,  $\text{CDCl}_3$ )  $\delta$  176.2, 142.1, 134.8, 133.8, 130.8,

128.7, 128.5, 127.4, 126.4, 88.6, 48.8, 33.2, 28.8; IR (film)  $\nu_{\text{max}}$  1772, 1492, 1163, 1003, 926, 808, 701  $\text{cm}^{-1}$ ;  $R_f(\text{toluene: ethyl acetate} = 5:1) = 0.6$ ;  $[\text{M}+\text{NH}_4]^+$  Calcd. For  $\text{C}_{17}\text{H}_{19}\text{ClNO}_2$ : 304.1099; Found: 304.1105.  $[\alpha]_{\text{D}}^{24} = +4.1$  ( $c = 1$ ,  $\text{CHCl}_3$ ). The enantiomeric excess was determined by chiral HPLC analysis: Chiralcel OD-H 4.6 mm x 250 mm, hexanes:*i*-PrOH = 95:5, 1.0 mL/min, 230 nm,  $t_R = 19.5$  min (major) and 18.2 min (minor).

### Enantioselective Oxyalkylation (Scheme 8)

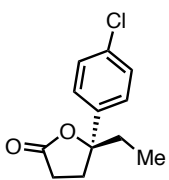

**(S)-5-(4-chlorophenyl)-5-ethyldihydrofuran-2(3H)-one (15)** (Scheme 7) An

oven-dried Fisher Scientific 20x150 mm re-sealable test tube equipped with a

Teflon-coated magnetic stir bar was charged with tetrakis(acetonitrile)copper(I)

hexafluorophosphate (37.3 mg, 0.10 mmol, 0.20 equiv), 2,2'-

isopropylidenebis[(4*S*)-4-tert-butyl-2-oxazoline] (**L**) (29.4 mg, 0.10 mmol, 0.20 equiv), (diacetoxyiodo)benzene (320 mg, 1.0 mmol, 2.0 equiv), potassium fluoride (15 mg, 0.25 mmol, 0.50 equiv) and **2c** (105 mg, 0.50 mmol, 1.0 equiv). The tube was then sealed with a Teflon screw-cap septum (10/90, Teflon/SIL, National Scientific) and connected to a Schlenk line. The vessel was briefly evacuated and backfilled with argon (this sequence was repeated a total of three times). Anhydrous MTBE (8 mL) was added to the tube via syringe and the argon pressure was removed. The reaction mixture was stirred at room temperature (25 °C) for 16 h. The reaction mixture was carefully diluted with saturated aqueous sodium bicarbonate solution (8 mL) and  $\text{Et}_2\text{O}$  (4 mL). The aqueous layer was separated and extracted with  $\text{Et}_2\text{O}$  (8 mLx3). The combined organic layers were concentrated *in vacuo*. The residue was then purified by

silica gel flash column chromatography (hexanes: ethyl acetate = 10:1 to 4:1) to afford **15** (22.0 mg, 20% yield, 60% ee).

$^1\text{H}$  NMR (400 MHz,  $\text{CDCl}_3$ )  $\delta$  7.35 (d,  $J$  = 8.4 Hz, 2 H), 7.27 (d,  $J$  = 8.4 Hz, 2 H), 2.60 (m, 1 H), 2.51-2.39 (m, 3 H), 1.97 (q,  $J$  = 7.2 Hz, 2 H), 0.82 (t,  $J$  = 7.2 Hz, 3 H);  $^{13}\text{C}$  NMR (100 MHz,  $\text{CDCl}_3$ )  $\delta$  176.4, 141.5, 133.6, 128.8, 126.4, 89.5, 35.4, 34.7, 28.8, 8.3; IR (film)  $\nu_{\text{max}}$  1739, 1365, 1229, 1217, 1091;  $R_f$ (hexanes: ethyl acetate = 2:1) = 0.5;  $[\text{M}+\text{H}]^+$  Calcd. For  $\text{C}_{12}\text{H}_{14}\text{ClO}_2$ : 225.0677; Found: 225.0683. The enantiomeric excess was determined by chiral HPLC analysis: Chiralcel OJ-H 4.6 mm x 250 mm, hexanes:*i*-PrOH = 90:10, 1.0 mL/min, 230 nm,  $t_R$  = 14.7 min (major) and 11.3 min (minor).

### ***Effect of concentration on enantioselectivity***

The enantioselectivity slightly decreases as the system gets more concentrated, as shown by the following chart using oxytrifluoromethylation as an example (SI-Scheme 2). The enantiomeric excess of the product **17a** dropped to 72% from 82% as the concentration increased from 0.05 M to 0.5 M. Concentrations lower than 0.05 M did not afford significant ee improvement but resulted in much lower conversion of **2a** as well as lower yield of **17a** (~10% yield at 0.005M). Similar trend was observed with the oxyazidation reaction, where the product **4c**'s ee increased from 80% to 85% as the reaction concentration decreased from 0.042 M to 0.017 M (at RT). However <10% yield was obtained at 0.005 M.

**SI-Scheme 2. Concentration effect.**

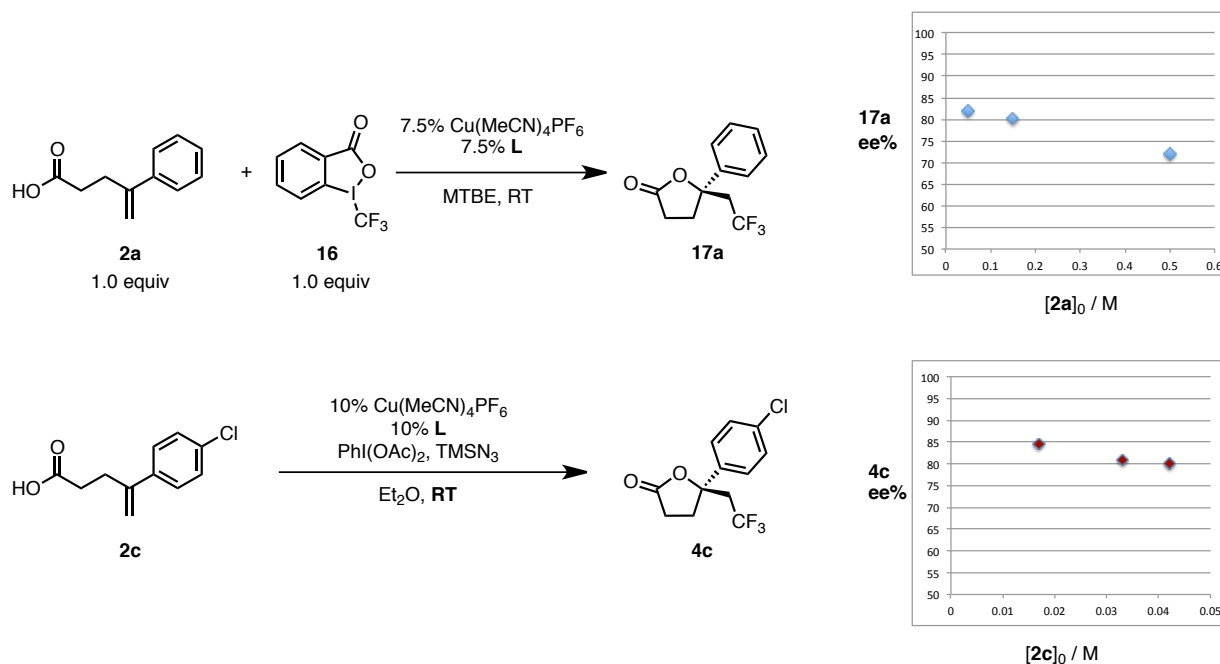

**Hammett plot (Scheme 9)**

**Independent reactions:** An oven-dried screw-cap NMR tube was charged with tetrakis(acetonitrile)copper(I) hexafluorophosphate (1.9 mg, 0.0050 mmol, 0.10 equiv) and sealed with a Teflon screw-cap septum. The tube was connected to a Schlenk line. The tube was briefly evacuated and backfilled with argon (this sequence was repeated a total of two times). The argon pressure was removed. 0.60 mL of a stock solution in anhydrous methylene chloride under argon containing **16** (0.083 mol/L), **2** (0.083 mol/L), **L** (0.0083 mol/L) and internal standard ( $\alpha,\alpha,\alpha$ -trifluorotoluene) was added to the tube via syringe. The reaction progress was monitored by  $^{19}F$  NMR spectroscopy. The initial reaction rate was determined and used for the calculation of  $\log(k_R/k_H)$ .

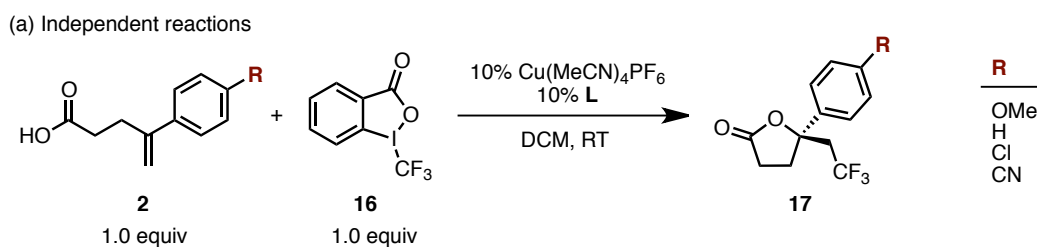

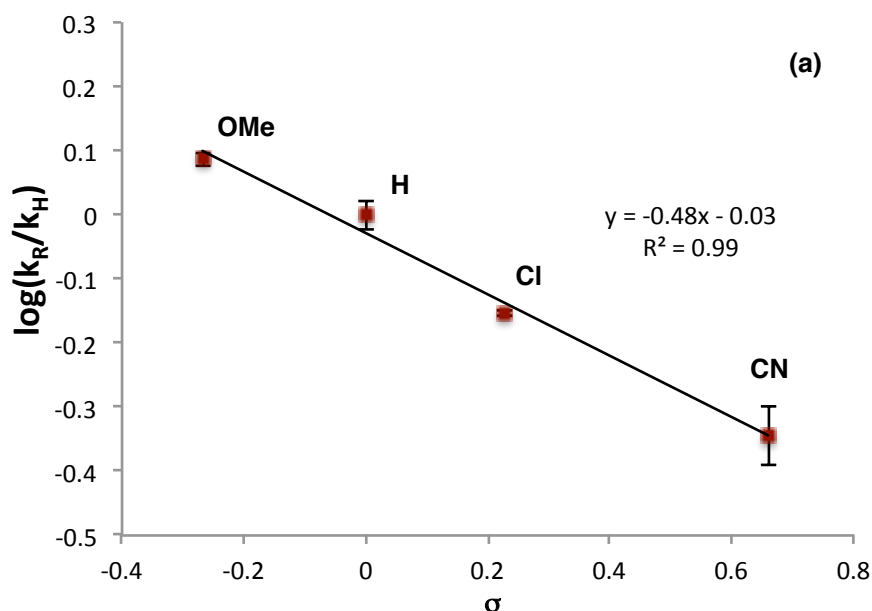

| R   | log( $k_R/k_H$ ) |       |                |
|-----|------------------|-------|----------------|
|     | run 1            | run 2 | ave            |
| OMe | 0.098            | 0.076 | 0.087 ± 0.011  |
| H   | -0.023           | 0.022 | 0.000 ± 0.022  |
| Cl  | -0.15            | -0.16 | -0.154 ± 0.006 |
| CN  | -0.30            | -0.39 | -0.343 ± 0.047 |

*One-pot competition experiments:* An oven-dried Fisher Scientific 13×100 mm re-sealable test tube equipped with a Teflon-coated magnetic stir bar was charged with tetrakis(acetonitrile)copper(I) hexafluorophosphate (3.7 mg, 0.010 mmol, 0.10 equiv), 2,2'-isopropylidenebis[(4*S*)-4-*tert*-butyl-2-oxazoline] (**L**) (2.9 mg, 0.010 mmol, 0.10 equiv) and **16** (3.2 mg, 0.010 mmol, 0.10 equiv). The reaction tube was sealed with a septum screw-cap (Thermo Scientific ASM PHN CAP w/PTFE/SIL, cat. #03378316). The reaction tube was connected to a Schlenk line through a needle. The reaction tube was then briefly evacuated and backfilled with argon (this sequence was repeated a total of three times). The argon pressure was removed and 1.2 mL of a stock solution in anhydrous methylene chloride under argon containing **2** (0.042 mol/L, 0.50 equiv) and **2a** (0.042 mol/L, 0.50 equiv) was added to the tube via syringe. The

reaction mixture was stirred at room temperature for 1 min. The reaction mixture was diluted with saturated aqueous sodium bicarbonate solution (4 mL) and ethyl ether (2 mL). The aqueous layer was separated and extracted with ethyl acetate (2 mL×3). The combined organic layers were concentrated *in vacuo*. The residue was redissolved in CDCl<sub>3</sub> and internal standard ( $\alpha,\alpha,\alpha$ -trifluorotoluene) was added. The resulting mixture was analyzed by <sup>19</sup>F NMR spectroscopy (proton decoupled). The product ratio **17/17a** was determined and used for the calculation of log(*k<sub>R</sub>*/*k<sub>H</sub>*).

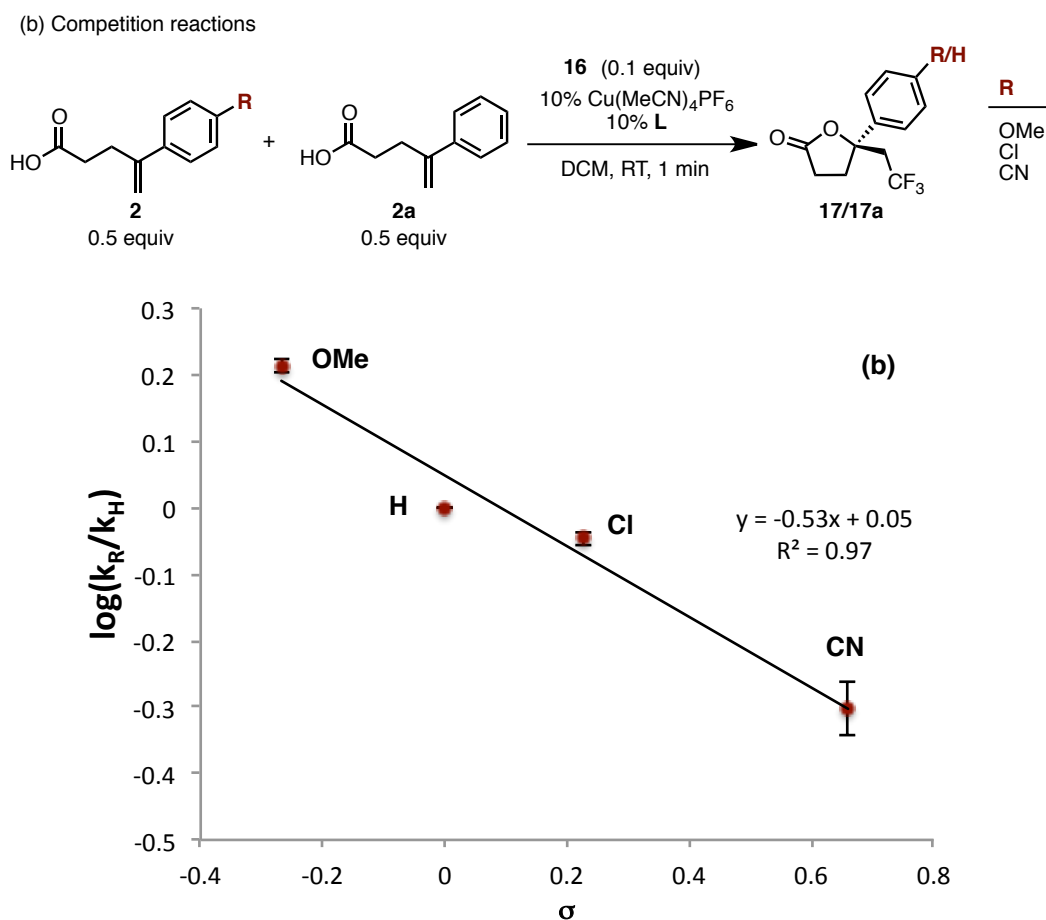

| R          | product ration ( <b>17:17a</b> ) |      |      |      |      | log( <i>k<sub>R</sub></i> / <i>k<sub>H</sub></i> ) |
|------------|----------------------------------|------|------|------|------|----------------------------------------------------|
|            | # 1                              | # 2  | #3   | #4   | #5   |                                                    |
| <b>OMe</b> | 1.60                             | 1.64 | 1.70 | 1.58 | 1.66 | 0.21 ± 0.01                                        |
| <b>Cl</b>  | 0.89                             | 0.90 | 0.87 | 0.93 | 0.92 | -0.046 ± 0.01                                      |
| <b>CN</b>  | 0.55                             | 0.54 | 0.46 | 0.44 | -    | -0.30 ± 0.04                                       |

### Effect of ligand stoichiometry (Figure 1)

An oven-dried Fisher Scientific 13×100 mm re-sealable test tube equipped with a Teflon-coated magnetic stir bar was charged with tetrakis(acetonitrile)copper(I) hexafluorophosphate (3.7 mg, 0.010 mmol, 0.10 equiv). The reaction tube was sealed with a septum screw-cap (Thermo Scientific ASM PHN CAP w/PTFE/SIL, cat. #03378316). The reaction tube was connected to a Schlenk line through a needle. The reaction tube was then briefly evacuated and backfilled with argon (this sequence was repeated a total of three times). The argon pressure was removed. 20x  $\mu$ L of stock solution of 2,2'-isopropylidenebis[(4S)-4-tert-butyl-2-oxazoline] (**L**) (0.050 mol/L in anhydrous methylene chloride) was added via syringe followed by additional (600-20x)  $\mu$ L anhydrous methylene chloride. The resulting mixture was stirred at RT for 1 min, to which 0.60 mL of a stock solution in anhydrous methylene chloride under argon containing **2c** (0.16 mol/L, 1.0 equiv), **16** (0.16 mol/L, 1.0 equiv) and internal standard ( $\alpha,\alpha,\alpha$ -trifluorotoluene) was added via syringe. The reaction mixture was stirred at room temperature for y min (y = 1.5 or 3.0). The reaction mixture was diluted with saturated aqueous sodium bicarbonate solution (4 mL) and  $\text{CHCl}_3$  (2 mL). The organic layer was separated and analyzed by  $^{19}\text{F}$  NMR spectroscopy.

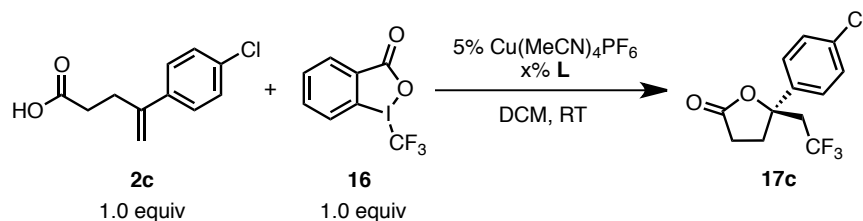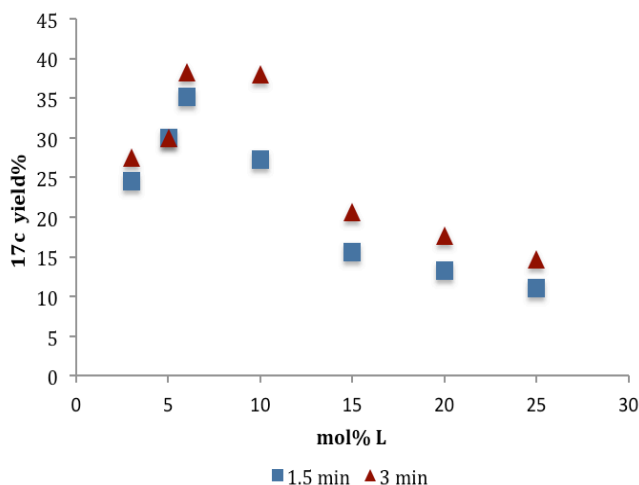

## Experimental References and Notes

- [1] Zhu, R.; Buchwald, S. L. *Angew. Chem. Int. Ed.* **2013**, *52*, 12655.
- [2] Whitehead, D. C.; Yousefi, R.; Jaganathan, A.; Borhan, B. *J. Am. Chem. Soc.* **2010**, *132*, 3298.
- [3] Karila, D.; Leman, L.; Dodd, R. H. *Org. Lett.* **2011**, *13*, 5830.
- [4] Nayyar, N. K.; Hutchison, D. R.; Martinelli, M. J. *J. Org. Chem.* **1997**, *62*, 982.
- [5] Jian, Y.-J.; Tang, C.-J.; Wu, Y. *J. Org. Chem.* **2007**, *72*, 4851.
- [6] Murai, K.; Nakamura, A.; Matsushita, T.; Shimura, M.; Fujioka, H. *Chem. Eur. J.* **2012**, *18*, 8448. The  $^1\text{H}$  NMR spectra of **4m** and **4n** were compared to those reported for compounds **i**, **ii** and **iii**. The splitting patterns and chemical shifts for H1, H2, H3, and H4 were compared.

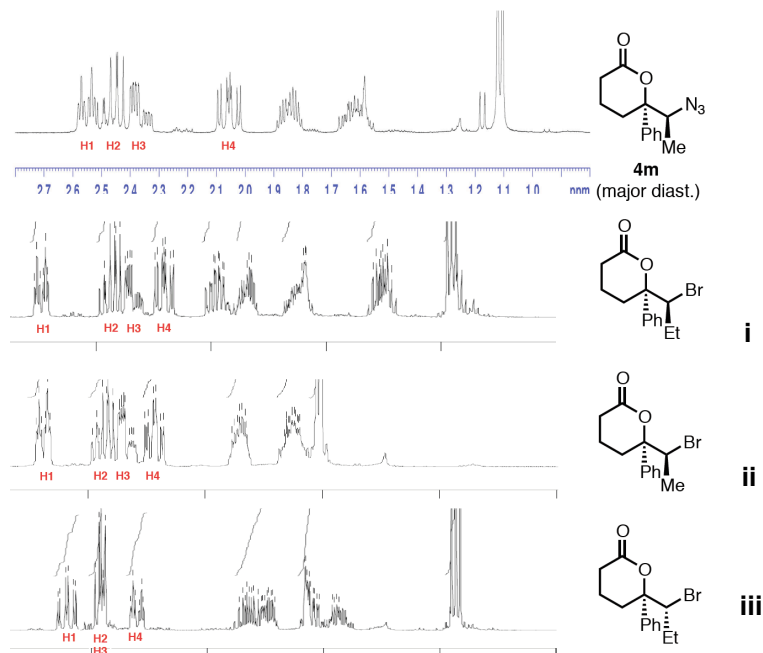

- [7] Gardiner, M.; Grigg, R.; Kordes, M.; Sridharan, V.; Vicker, N. *Tetrahedron* **2001**, *57*, 7729.
- [8] Li, Z.; Cui, Z.; Liu, Z.-Q. *Org. Lett.* **2013**, *15*, 406.
- [9] Pedersen, C. M.; Marinescu, L. G.; Bols, M. *Org. Biomol. Chem.*, **2005**, *3*, 816.



RZ-4-166-H

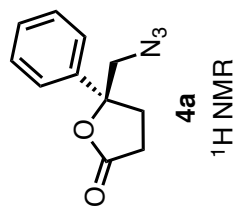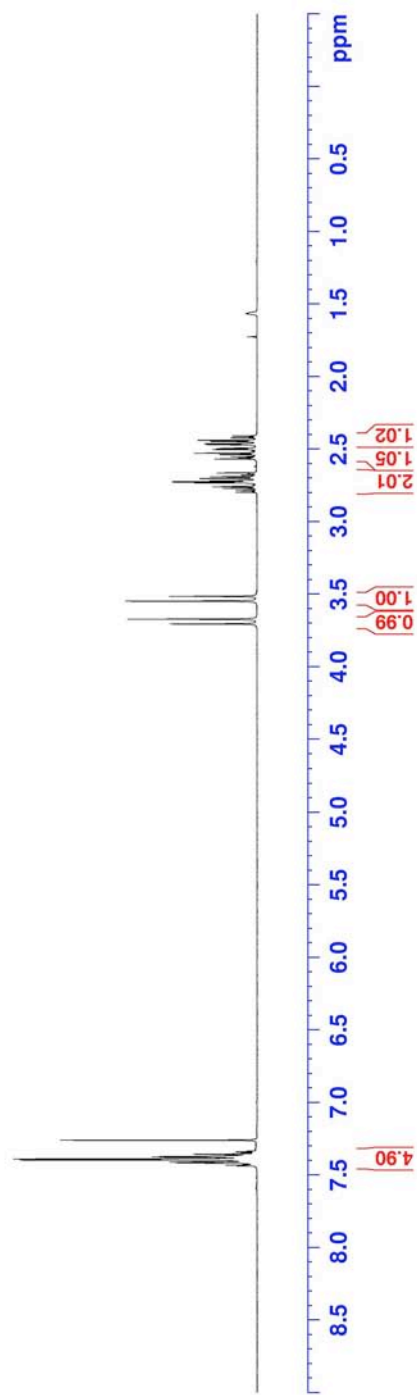

RZ-4-166-C

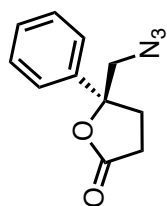

4a

<sup>13</sup>C NMR

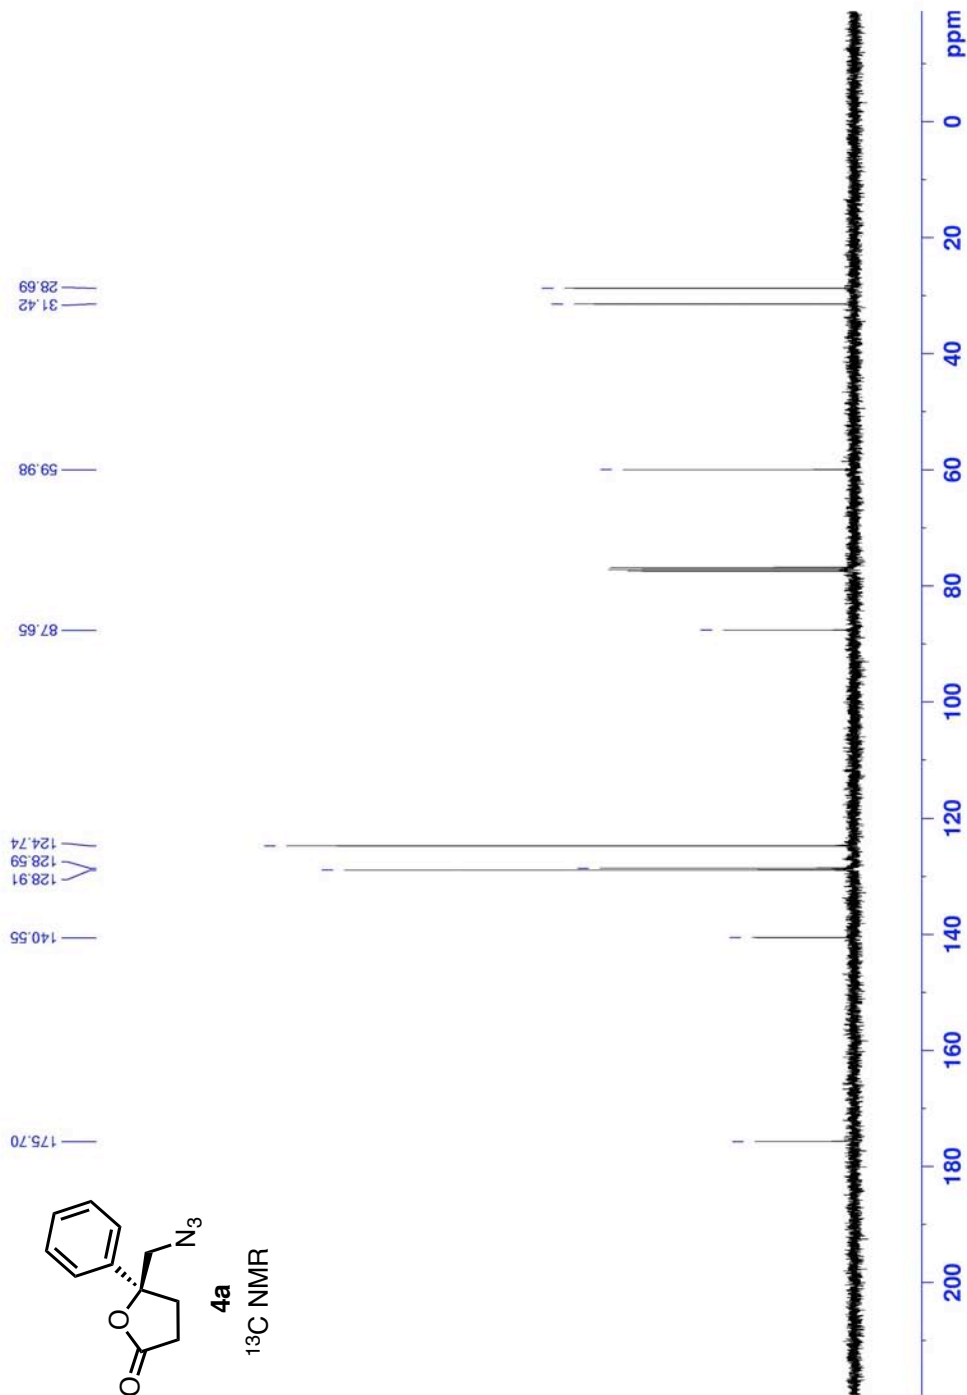

## HPLC traces for 4a:

Sample Name: RZ-4-166-RAC

```
=====
Acq. Operator   : RZ                      Seq. Line :    2
Acq. Instrument : Instrument 1             Location  : Vial 17
Injection Date  : 7/22/2014 8:52:16 AM     Inj       :    1
                                           Inj Volume: 1 µl
Different Inj Volume from Sequence !      Actual Inj Volume: 4 µl
Acq. Method     : C:\CHEM32\1\DATA\RONG\NAOYUKI_LC 2014-07-22 08-08-53\RZ-5IPA-1ML-2013-.M
```

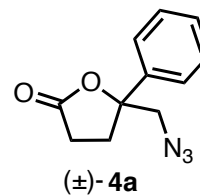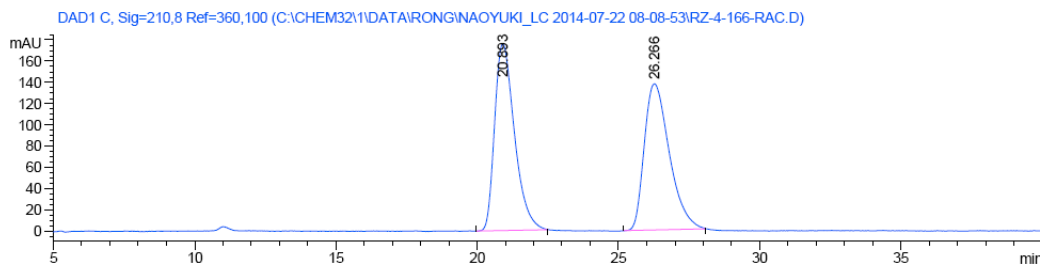

Signal 3: DAD1 C, Sig=210,8 Ref=360,100

| Peak # | RetTime [min] | Type | Width [min] | Area [mAU*s] | Height [mAU] | Area %  |
|--------|---------------|------|-------------|--------------|--------------|---------|
| 1      | 20.893        | BB   | 0.7269      | 8601.23047   | 175.76074    | 50.1902 |
| 2      | 26.266        | BB   | 0.7623      | 8536.03516   | 137.86684    | 49.8098 |

Totals : 1.71373e4 313.62758

Sample Name: RZ-4-166

```
=====
Acq. Operator   : RZ                      Seq. Line :    1
Acq. Instrument : Instrument 1             Location  : Vial 16
Injection Date  : 7/22/2014 8:11:08 AM     Inj       :    1
                                           Inj Volume: 1 µl
Different Inj Volume from Sequence !      Actual Inj Volume: 4 µl
Acq. Method     : C:\CHEM32\1\DATA\RONG\NAOYUKI_LC 2014-07-22 08-08-53\RZ-5IPA-1ML-2013-.M
```

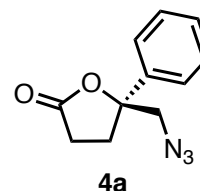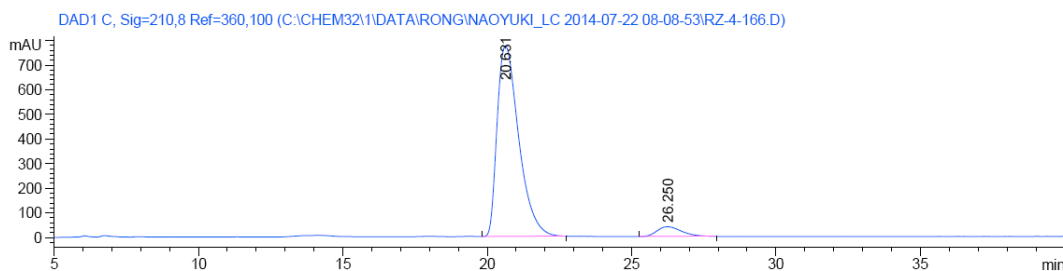

Signal 3: DAD1 C, Sig=210,8 Ref=360,100

| Peak # | RetTime [min] | Type | Width [min] | Area [mAU*s] | Height [mAU] | Area %  |
|--------|---------------|------|-------------|--------------|--------------|---------|
| 1      | 20.631        | BV   | 0.7812      | 4.02596e4    | 773.55682    | 94.3599 |
| 2      | 26.250        | VB   | 0.7156      | 2406.40234   | 40.01611     | 5.6401  |

Totals : 4.26660e4 813.57293

RZ-4-182-H

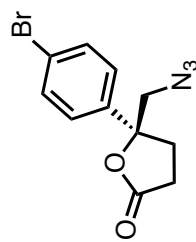

**4b**

<sup>1</sup>H NMR

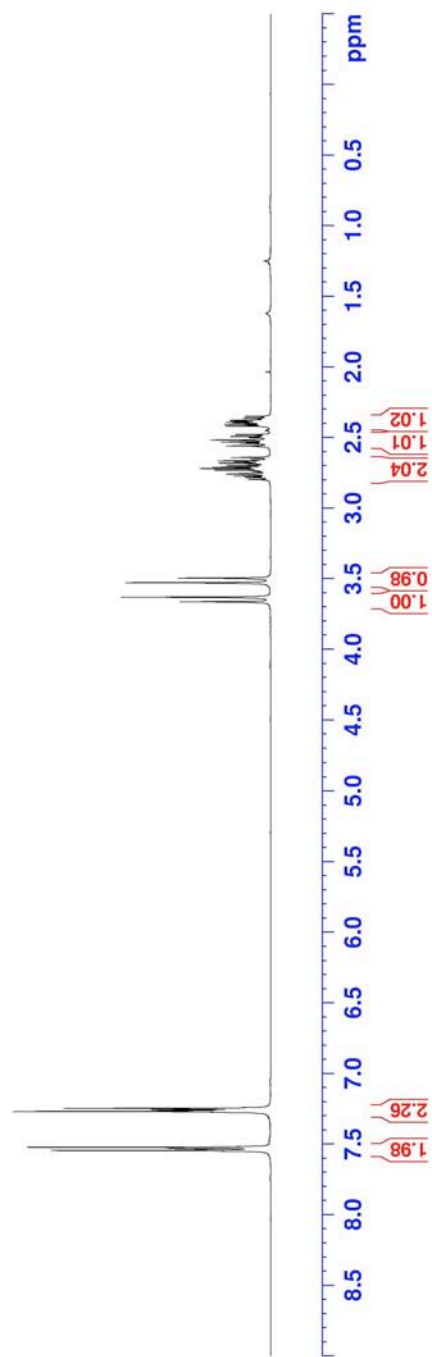

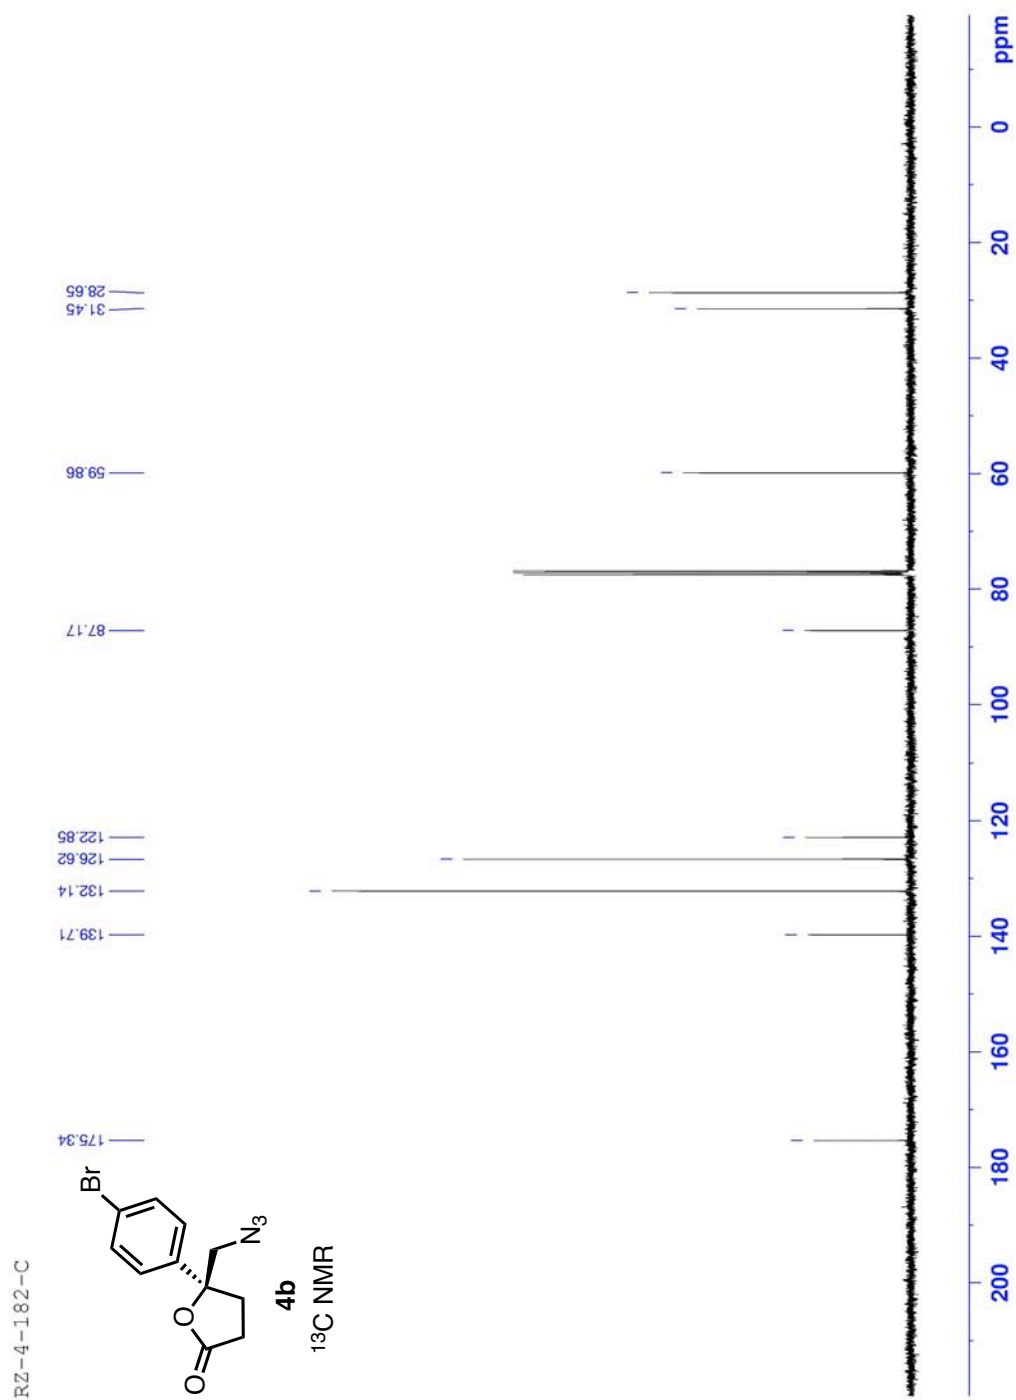

## HPLC traces for 4b:

Sample Name: RZ-4-182-RAC

```
=====
Acq. Operator   : RZ                      Seq. Line :    1
Acq. Instrument : Instrument 1             Location  : Vial 16
Injection Date  : 8/6/2014 5:46:23 PM      Inj       :    1
                                           Inj Volume: 1 µl
Different Inj Volume from Sequence !      Actual Inj Volume : 5 µl
Acq. Method     : C:\CHEM32\1\DATA\RONG\NAOYUKI_LC 2014-08-06 17-43-53\RZ-5IPA-1ML-2013-.M
```

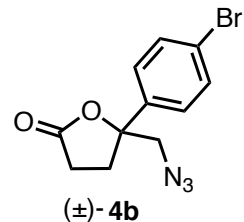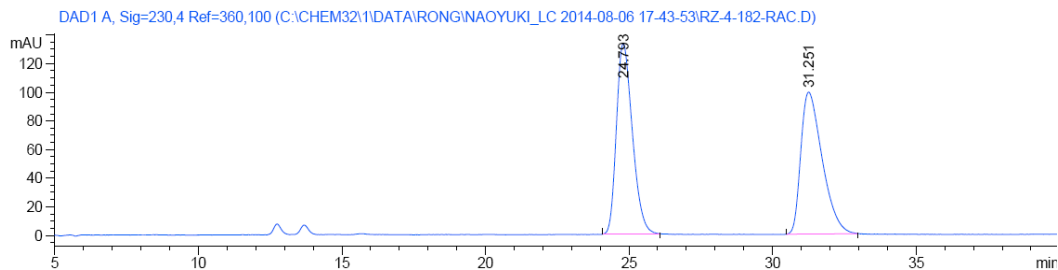

Signal 1: DAD1 A, Sig=230,4 Ref=360,100

| Peak # | RetTime [min] | Type | Width [min] | Area [mAU*s] | Height [mAU] | Area %  |
|--------|---------------|------|-------------|--------------|--------------|---------|
| 1      | 24.793        | BB   | 0.6001      | 5160.43164   | 133.17227    | 49.9961 |
| 2      | 31.251        | BB   | 0.7904      | 5161.24463   | 99.30509     | 50.0039 |

Totals : 1.03217e4 232.47736

Sample Name: RZ-4-182

```
=====
Acq. Operator   : RZ                      Seq. Line :    1
Acq. Instrument : Instrument 1             Location  : Vial 16
Injection Date   : 8/1/2014 7:17:52 AM     Inj       :    1
                                           Inj Volume: 1 µl
Different Inj Volume from Sequence !      Actual Inj Volume : 3 µl
Acq. Method     : C:\CHEM32\1\DATA\RONG\NAOYUKI_LC 2014-08-01 07-15-31\RZ-5IPA-1ML-2013-.M
```

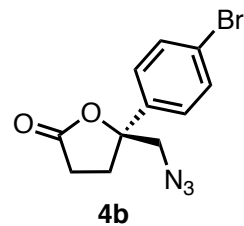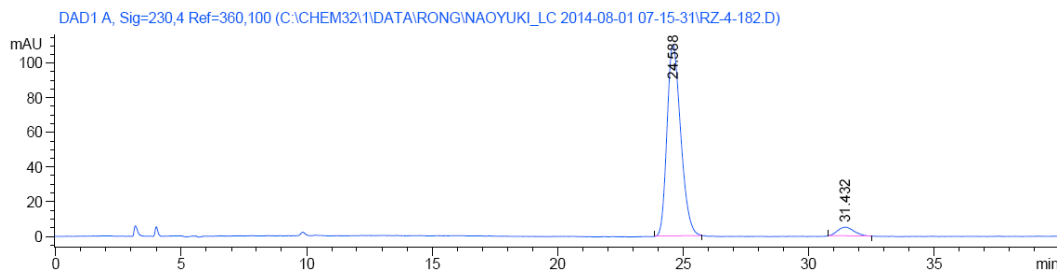

Signal 1: DAD1 A, Sig=230,4 Ref=360,100

| Peak # | RetTime [min] | Type | Width [min] | Area [mAU*s] | Height [mAU] | Area %  |
|--------|---------------|------|-------------|--------------|--------------|---------|
| 1      | 24.588        | BB   | 0.5745      | 4195.15039   | 110.60049    | 94.5795 |
| 2      | 31.432        | BB   | 0.5531      | 240.42851    | 5.16516      | 5.4205  |

Totals : 4435.57890 115.76566

RZ-4-172-H

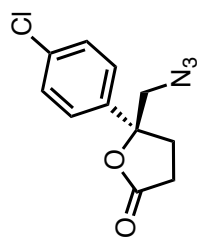

**4c**  
 $^1\text{H}$  NMR

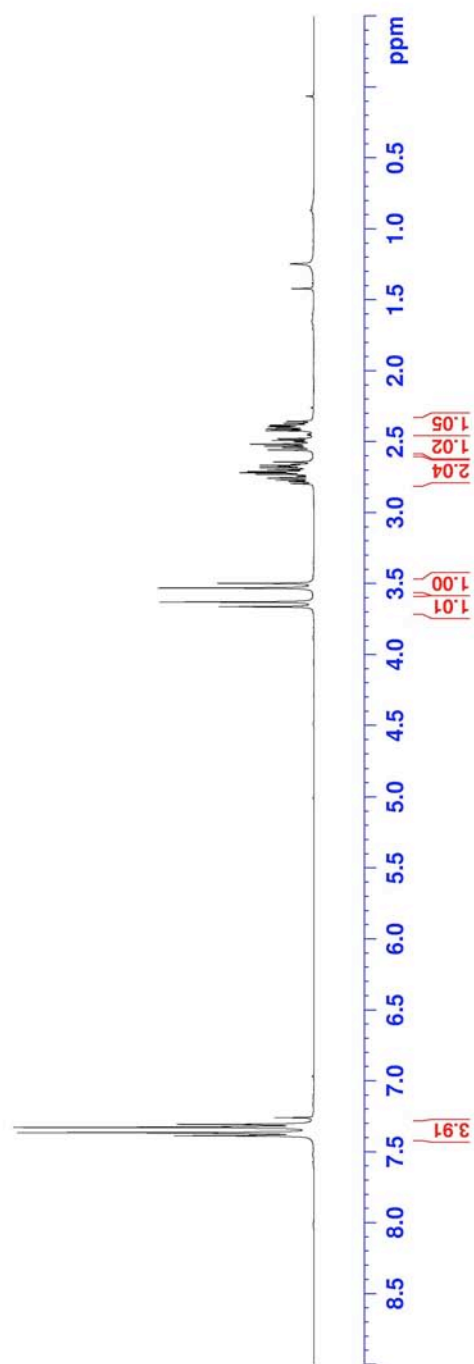

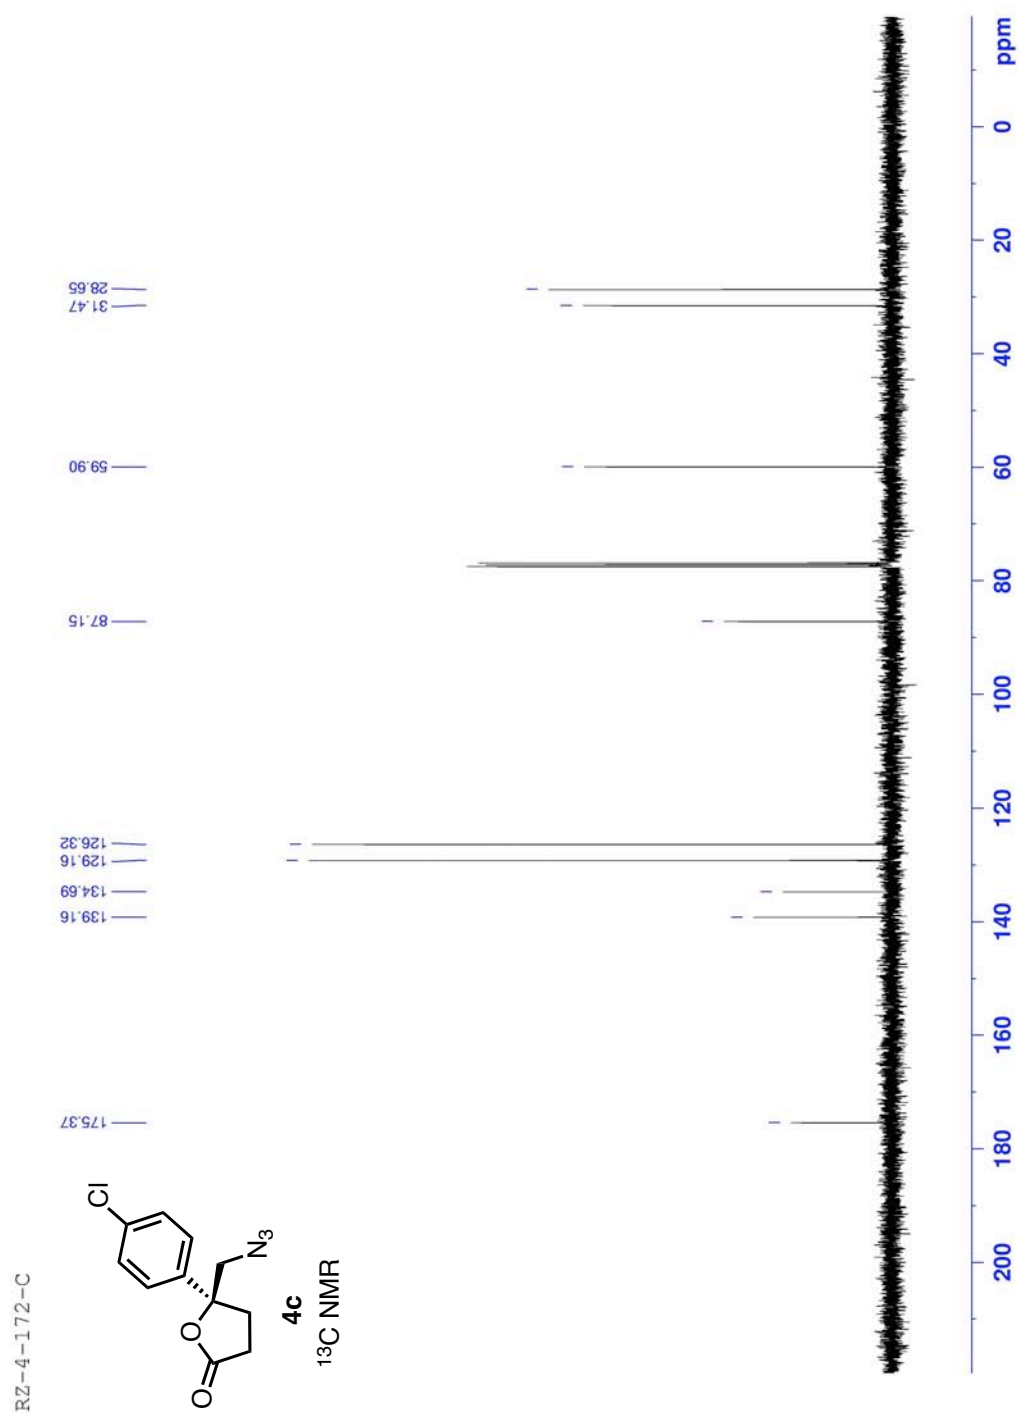



## HPLC traces for 4c:

Sample Name: RZ-4-172-RAC

```
=====
Acq. Operator   : RZ                      Seq. Line :    5
Acq. Instrument : Instrument 1             Location  : Vial 18
Injection Date  : 7/22/2014 10:50:36 AM    Inj       :    1
                                           Inj Volume: 1 µl
Acq. Method     : C:\CHEM32\1\DATA\RONG\NAOYUKI_LC 2014-07-22 08-08-53\RZ-5IPA-1ML-2013-.M
```

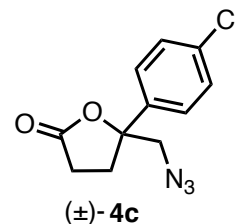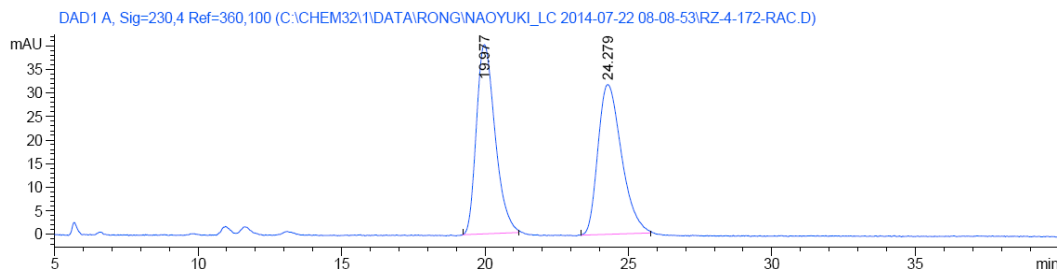

Signal 1: DAD1 A, Sig=230,4 Ref=360,100

| Peak # | RetTime [min] | Type | Width [min] | Area [mAU*s] | Height [mAU] | Area %  |
|--------|---------------|------|-------------|--------------|--------------|---------|
| 1      | 19.977        | BB   | 0.6513      | 1820.84253   | 40.13295     | 50.0045 |
| 2      | 24.279        | BB   | 0.7439      | 1820.51843   | 31.80194     | 49.9955 |

Totals : 3641.36096 71.93489

Sample Name: RZ-4-172

```
=====
Acq. Operator   : RZ                      Seq. Line :    4
Acq. Instrument : Instrument 1             Location  : Vial 17
Injection Date  : 7/22/2014 10:09:30 AM    Inj       :    1
                                           Inj Volume: 1 µl
Different Inj Volume from Sequence !      Actual Inj Volume : 2 µl
Acq. Method     : C:\CHEM32\1\DATA\RONG\NAOYUKI_LC 2014-07-22 08-08-53\RZ-5IPA-1ML-2013-.M
```

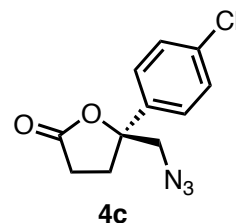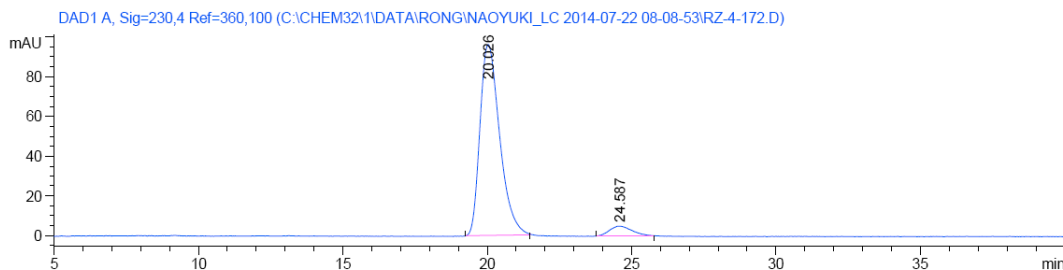

Signal 1: DAD1 A, Sig=230,4 Ref=360,100

| Peak # | RetTime [min] | Type | Width [min] | Area [mAU*s] | Height [mAU] | Area %  |
|--------|---------------|------|-------------|--------------|--------------|---------|
| 1      | 20.026        | BB   | 0.7173      | 4562.40234   | 96.20024     | 94.4555 |
| 2      | 24.587        | BB   | 0.6477      | 267.80951    | 4.91480      | 5.5445  |

Totals : 4830.21185 101.11505

RZ-4-190-H

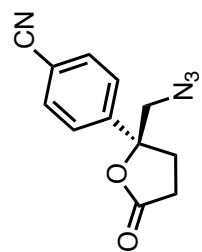

4d

$^1\text{H}$  NMR

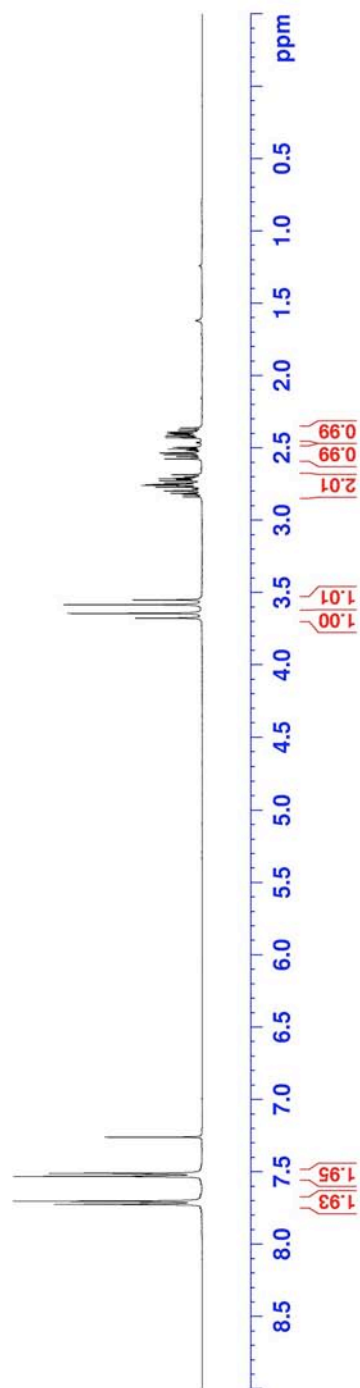

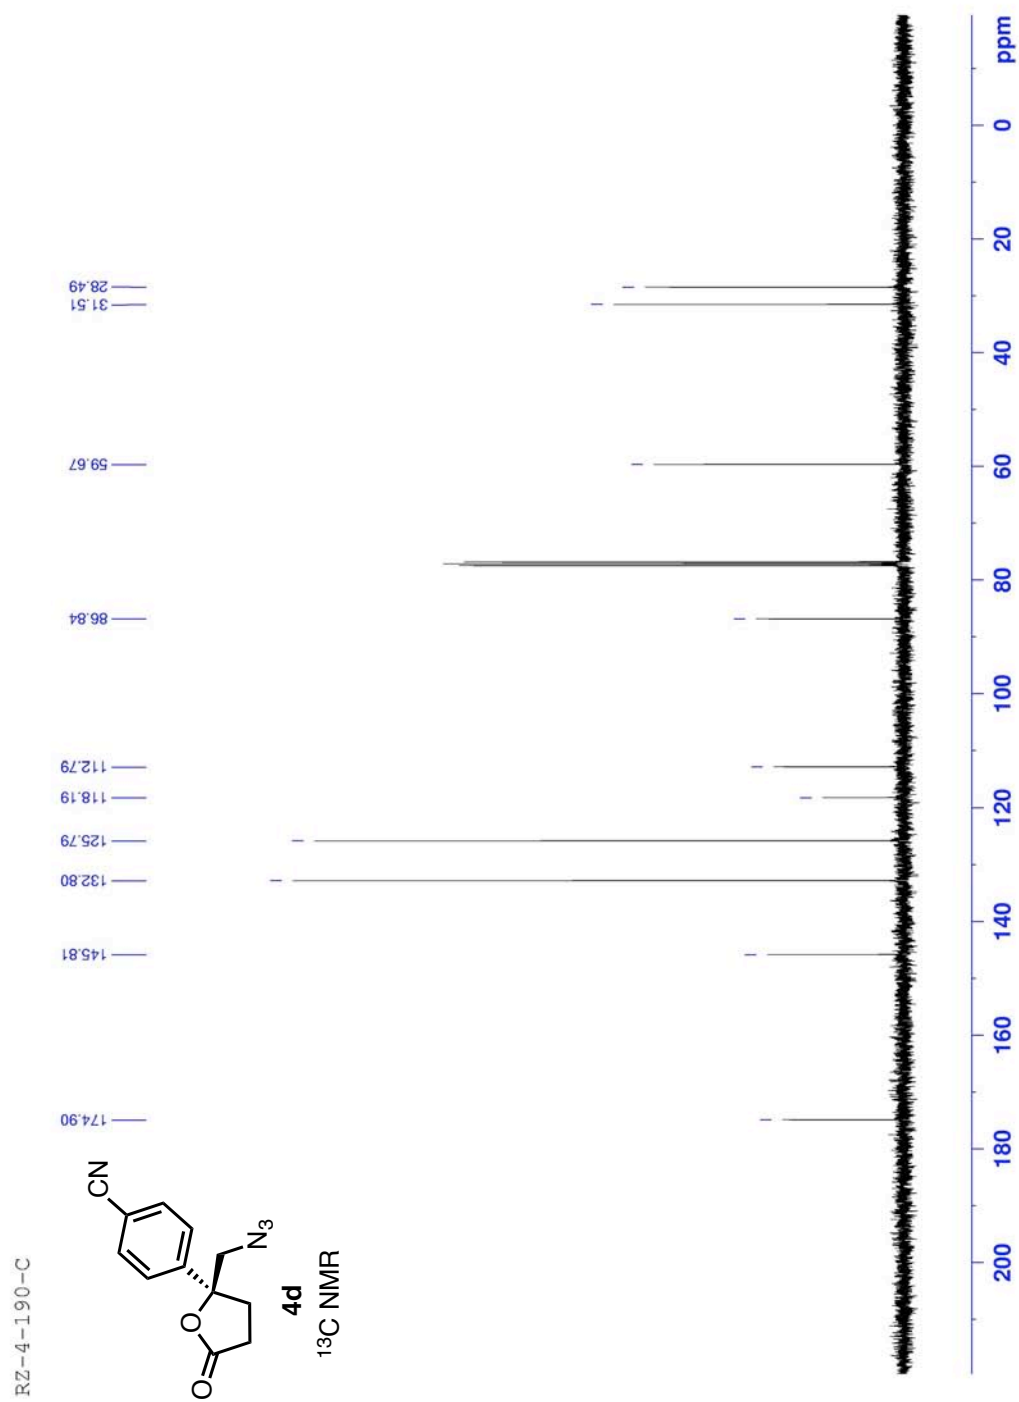

## HPLC traces for 4d:

Sample Name: RZ-4-190-RAC

```
=====
Acq. Operator   : RZ                               Seq. Line :    1
Acq. Instrument : Instrument 1                     Location  : Vial 17
Injection Date  : 8/20/2014 1:43:52 PM              Inj       :    1
                                                    Inj Volume: 1 µl
Different Inj Volume from Sequence !    Actual Inj Volume : 6 µl
Acq. Method     : C:\CHEM32\1\DATA\RONG\NAOYUKI_LC 2014-08-20 13-41-32\RZ-15IPA-2014.M
=====
```

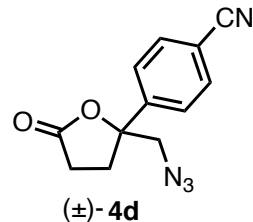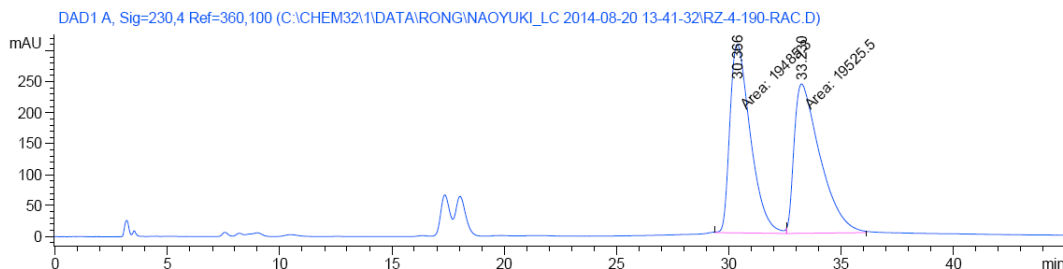

Signal 1: DAD1 A, Sig=230,4 Ref=360,100

| Peak # | RetTime [min] | Type | Width [min] | Area [mAU*s] | Height [mAU] | Area %  |
|--------|---------------|------|-------------|--------------|--------------|---------|
| 1      | 30.366        | MM   | 1.0648      | 1.94853e4    | 304.99750    | 49.9484 |
| 2      | 33.230        | MM   | 1.3457      | 1.95255e4    | 241.82451    | 50.0516 |

Totals : 3.90108e4 546.82201

Sample Name: RZ-4-190

```
=====
Acq. Operator   : RZ                               Seq. Line :    2
Acq. Instrument : Instrument 1                     Location  : Vial 16
Injection Date  : 8/20/2014 2:30:02 PM              Inj       :    1
                                                    Inj Volume: 1 µl
Different Inj Volume from Sequence !    Actual Inj Volume : 6 µl
Acq. Method     : C:\CHEM32\1\DATA\RONG\NAOYUKI_LC 2014-08-20 13-41-32\RZ-15IPA-2014.M
=====
```

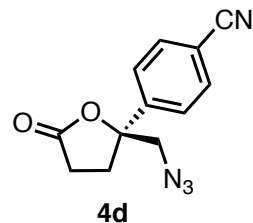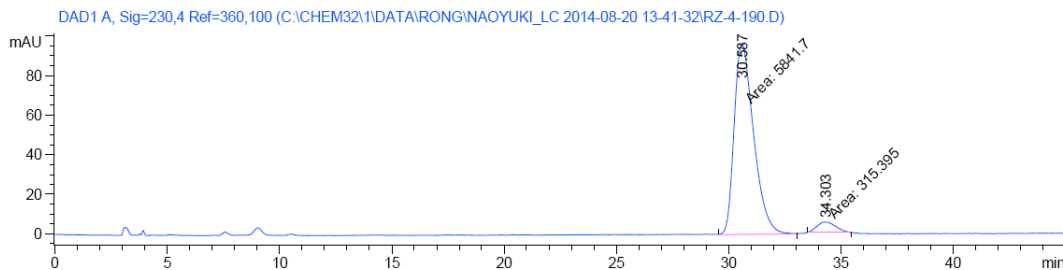

Signal 1: DAD1 A, Sig=230,4 Ref=360,100

| Peak # | RetTime [min] | Type | Width [min] | Area [mAU*s] | Height [mAU] | Area %  |
|--------|---------------|------|-------------|--------------|--------------|---------|
| 1      | 30.587        | MM   | 1.0066      | 5841.70020   | 96.71944     | 94.8775 |
| 2      | 34.303        | MM   | 0.9822      | 315.39474    | 5.35182      | 5.1225  |

Totals : 6157.09494 102.07127

RZ-4-186-H

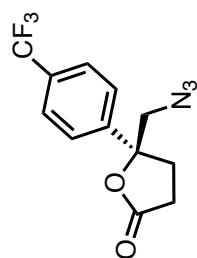

**4e**

<sup>1</sup>H NMR

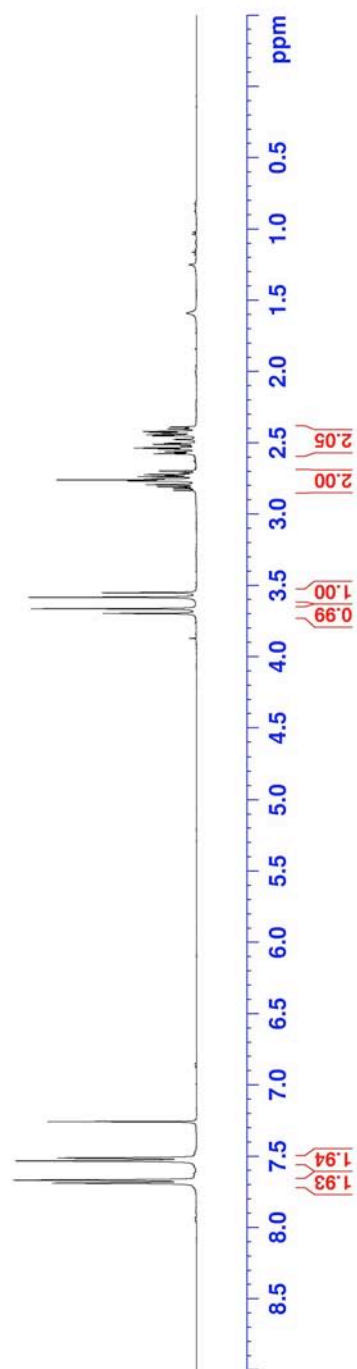

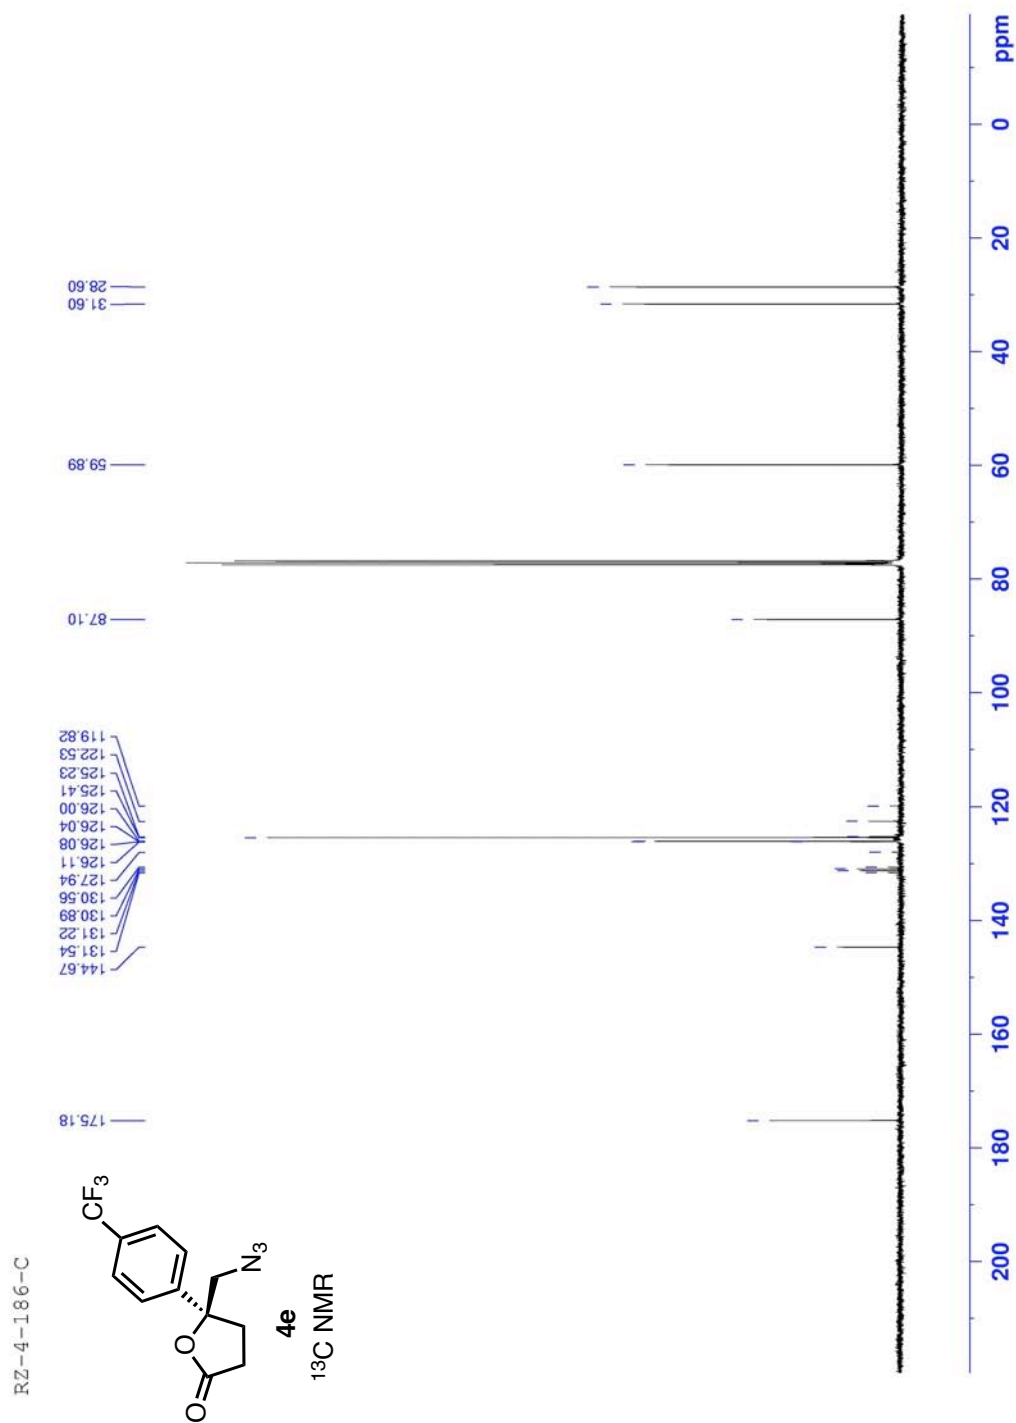

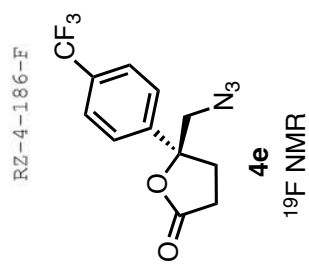

-62.77

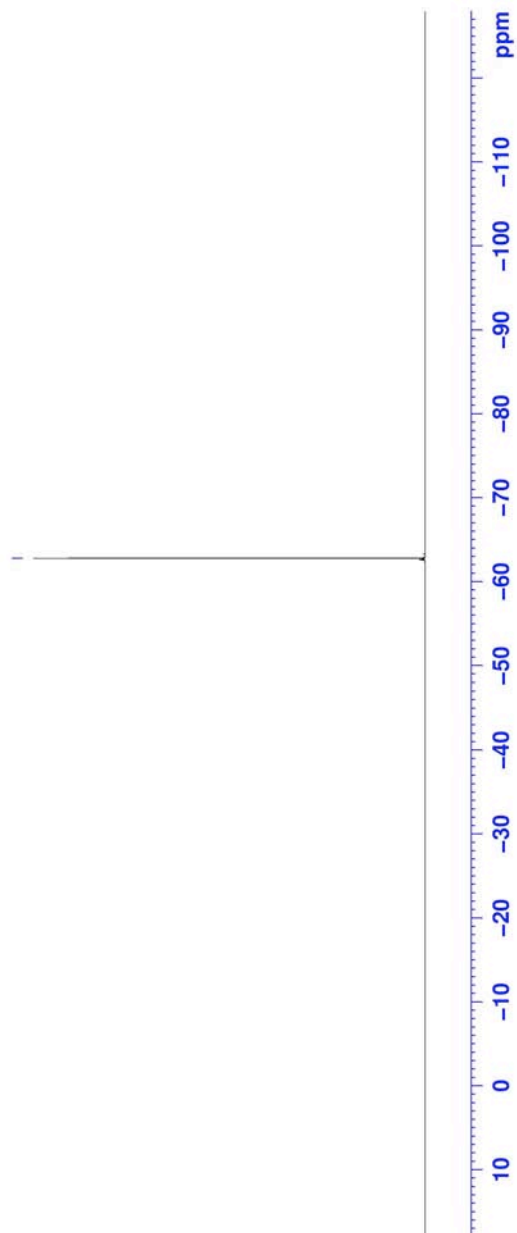

## HPLC traces for 4e:

Sample Name: RZ-4-186-RAC

```
=====
Acq. Operator   : RZ                               Seq. Line :    1
Acq. Instrument : Instrument 1                     Location  : Vial 17
Injection Date  : 8/19/2014 8:53:02 AM             Inj       :    1
                                                    Inj Volume: 1 µl
Different Inj Volume from Sequence !      Actual Inj Volume : 3 µl
Acq. Method     : C:\CHEM32\1\DATA\RONG\NAOYUKI_LC 2014-08-19 08-50-48\RZ-5IPA-1ML-2013-.M
```

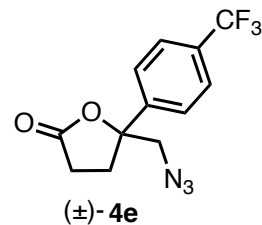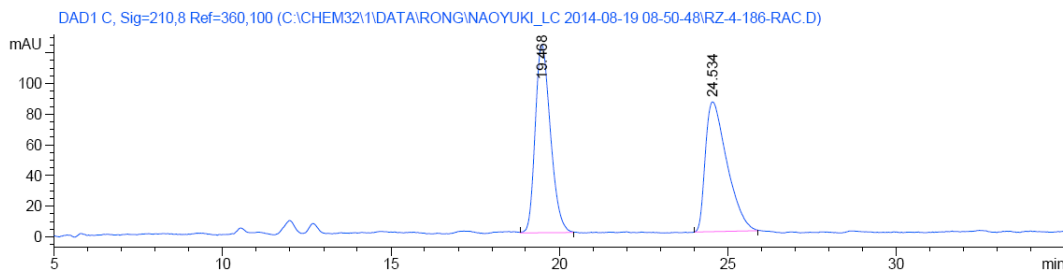

Signal 3: DAD1 C, Sig=210,8 Ref=360,100

| Peak # | RetTime [min] | Type | Width [min] | Area [mAU*s] | Height [mAU] | Area %  |
|--------|---------------|------|-------------|--------------|--------------|---------|
| 1      | 19.468        | VB   | 0.4645      | 3856.93750   | 122.78101    | 50.3897 |
| 2      | 24.534        | BB   | 0.6219      | 3797.28760   | 84.88390     | 49.6103 |

Totals : 7654.22510 207.66491

Sample Name: RZ-4-186

```
=====
Acq. Operator   : RZ                               Seq. Line :    1
Acq. Instrument : Instrument 1                     Location  : Vial 16
Injection Date   : 8/19/2014 2:53:19 PM             Inj       :    1
                                                    Inj Volume: 1 µl
Different Inj Volume from Sequence !      Actual Inj Volume : 12 µl
Acq. Method     : C:\CHEM32\1\DATA\RONG\NAOYUKI_LC 2014-08-19 14-50-59\RZ-5IPA-1ML-2013-.M
```

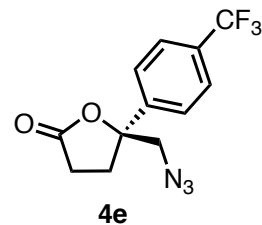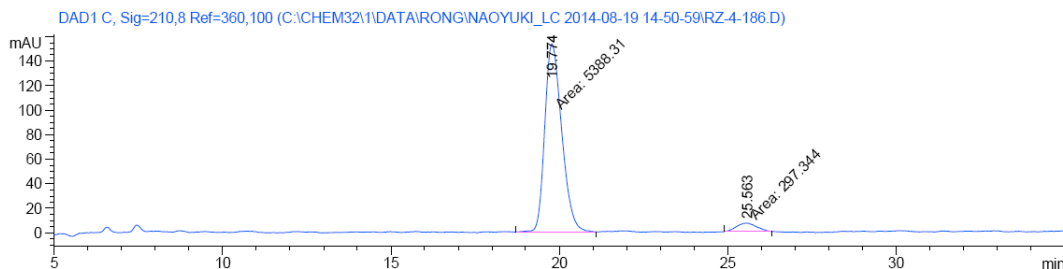

Signal 3: DAD1 C, Sig=210,8 Ref=360,100

| Peak # | RetTime [min] | Type | Width [min] | Area [mAU*s] | Height [mAU] | Area %  |
|--------|---------------|------|-------------|--------------|--------------|---------|
| 1      | 19.774        | MM   | 0.5860      | 5388.30957   | 153.24788    | 94.7703 |
| 2      | 25.563        | MM   | 0.7042      | 297.34396    | 7.03758      | 5.2297  |

Totals : 5685.65353 160.28546



RZ-4-164-H

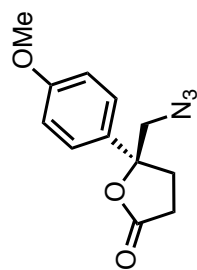

4f

<sup>1</sup>H NMR

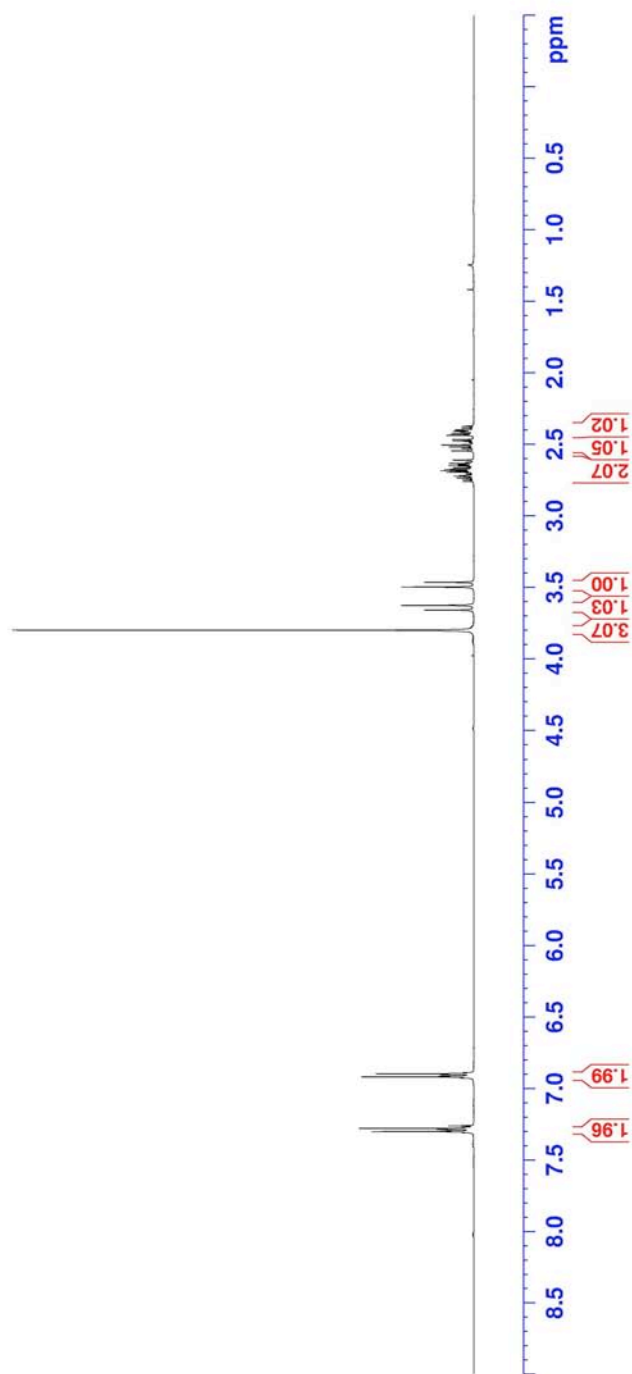

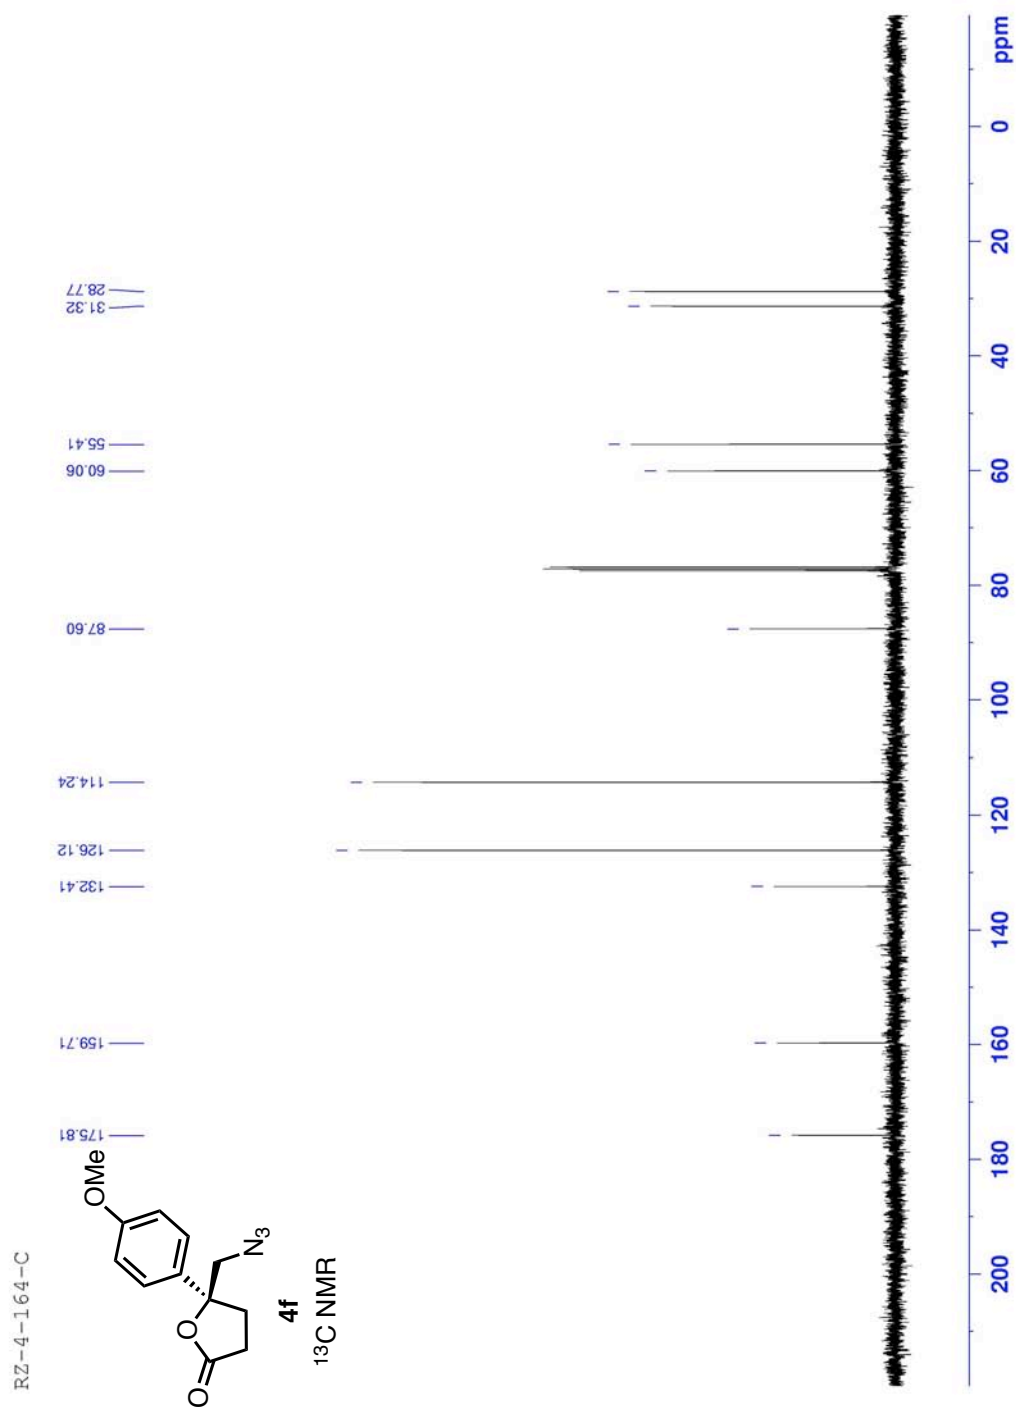

## HPLC traces for 4f:

Sample Name: RZ-4-164-RAC

```
=====
Acq. Operator   : RZ                      Seq. Line :    2
Acq. Instrument : Instrument 1             Location  : Vial 17
Injection Date  : 7/28/2014 9:53:18 AM    Inj       :    1
                                           Inj Volume: 1 µl
Different Inj Volume from Sequence !      Actual Inj Volume : 8 µl
Acq. Method     : C:\CHEM32\1\DATA\RONG\NAOYUKI_LC 2014-07-28 09-09-46\RZ-5IPA-1ML-2013-.M
=====
```

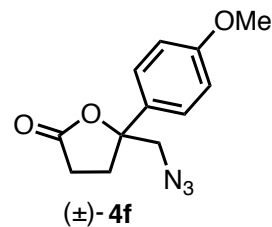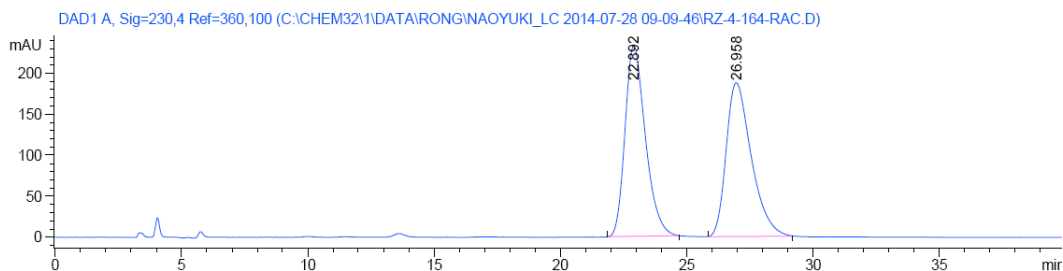

Signal 1: DAD1 A, Sig=230,4 Ref=360,100

| Peak # | RetTime [min] | Type | Width [min] | Area [mAU*s] | Height [mAU] | Area %  |
|--------|---------------|------|-------------|--------------|--------------|---------|
| 1      | 22.892        | BB   | 0.8382      | 1.31085e4    | 233.07202    | 50.1893 |
| 2      | 26.958        | BB   | 0.9848      | 1.30096e4    | 187.66890    | 49.8107 |

Totals : 2.61181e4 420.74092

Sample Name: RZ-4-164

```
=====
Acq. Operator   : RZ                      Seq. Line :    1
Acq. Instrument : Instrument 1             Location  : Vial 16
Injection Date  : 7/28/2014 9:12:06 AM    Inj       :    1
                                           Inj Volume: 1 µl
Different Inj Volume from Sequence !      Actual Inj Volume : 5 µl
Acq. Method     : C:\CHEM32\1\DATA\RONG\NAOYUKI_LC 2014-07-28 09-09-46\RZ-5IPA-1ML-2013-.M
=====
```

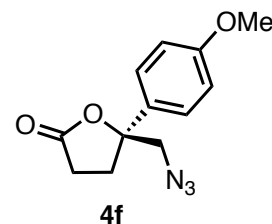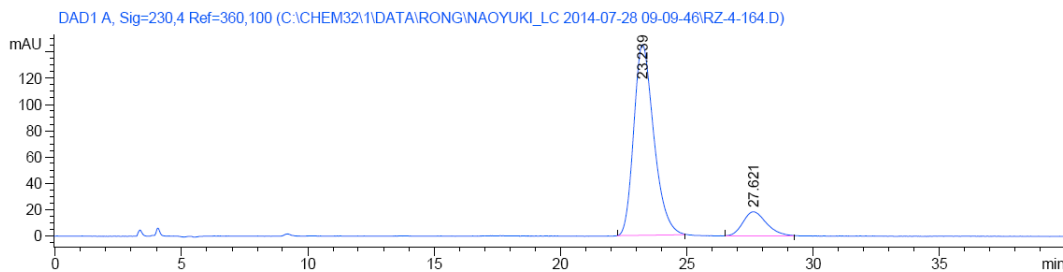

Signal 1: DAD1 A, Sig=230,4 Ref=360,100

| Peak # | RetTime [min] | Type | Width [min] | Area [mAU*s] | Height [mAU] | Area %  |
|--------|---------------|------|-------------|--------------|--------------|---------|
| 1      | 23.239        | BB   | 0.8258      | 8031.23877   | 145.08575    | 87.2371 |
| 2      | 27.621        | BB   | 0.7676      | 1174.97656   | 18.23970     | 12.7629 |

Totals : 9206.21533 163.32545

RZ-4-218A-H

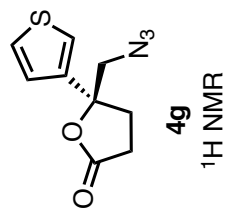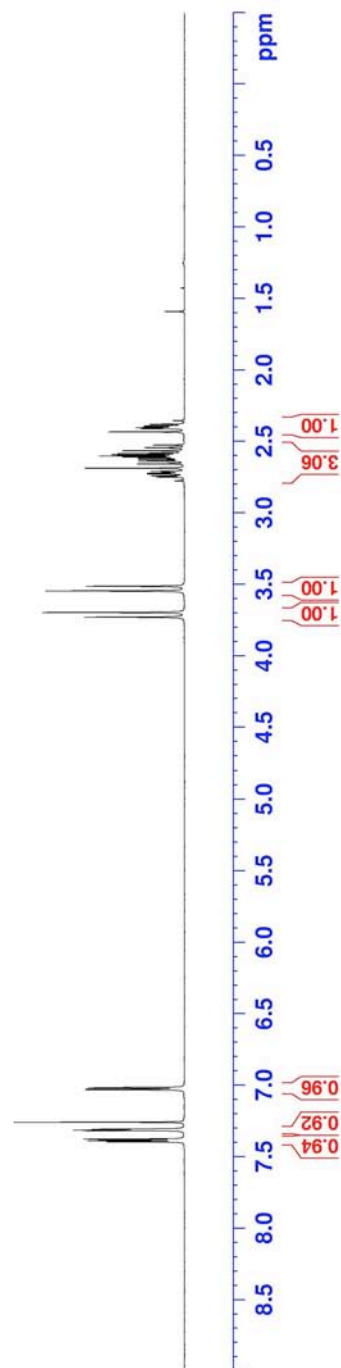

RZ-4-218A-C

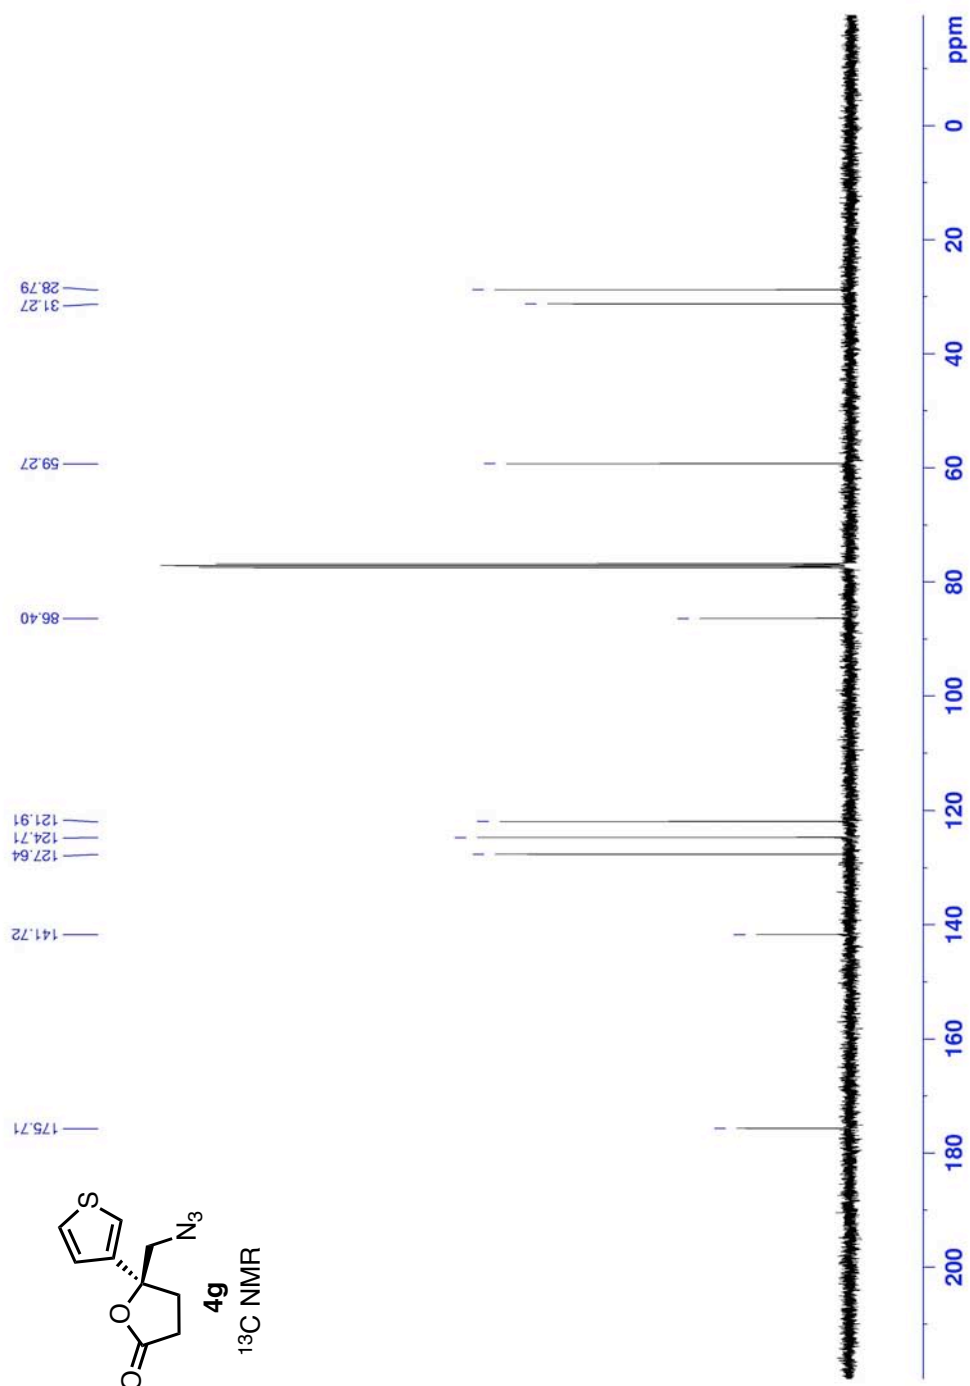

## HPLC traces for 4g:

Data File C:\CHEM32\1\DATA\RONG\NAOYUKI\_LC 2014-10-09 07-45-20\RZ-4-218A-RAC.D  
Sample Name: RZ-4-218A-RAC

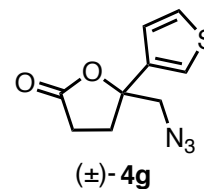

```
=====
Acq. Operator   : RZ                      Seq. Line :    6
Acq. Instrument : Instrument 1             Location  : Vial 19
Injection Date  : 10/9/2014 11:09:11 AM    Inj       :    1
                                           Inj Volume: 1 µl
Different Inj Volume from Sequence !      Actual Inj Volume : 8 µl
Acq. Method     : C:\CHEM32\1\DATA\RONG\NAOYUKI_LC 2014-10-09 07-45-20\RZ-5IPA-1ML-2013-.M
```

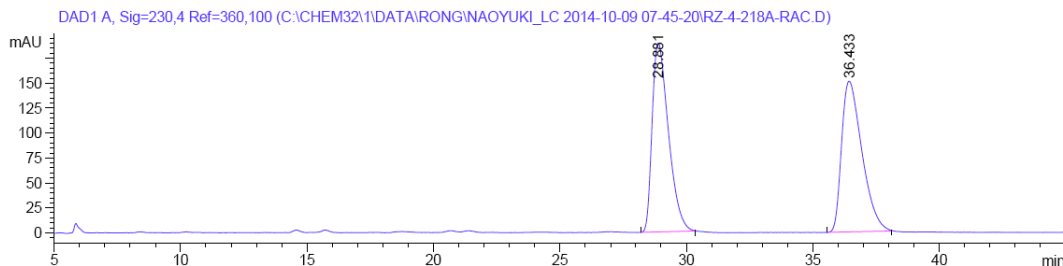

Signal 1: DAD1 A, Sig=230,4 Ref=360,100

| Peak # | RetTime [min] | Type | Width [min] | Area [mAU*s] | Height [mAU] | Area %  |
|--------|---------------|------|-------------|--------------|--------------|---------|
| 1      | 28.881        | BB   | 0.6575      | 8484.71289   | 189.09726    | 50.0582 |
| 2      | 36.433        | BB   | 0.7776      | 8464.98535   | 151.09933    | 49.9418 |

Totals : 1.69497e4 340.19659

Data File C:\CHEM32\1\DATA\RONG\NAOYUKI\_LC 2014-10-09 07-45-20\RZ-4-218A.D  
Sample Name: RZ-4-218A

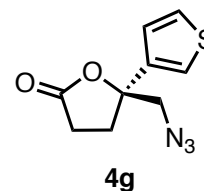

```
=====
Acq. Operator   : RZ                      Seq. Line :    4
Acq. Instrument : Instrument 1             Location  : Vial 17
Injection Date  : 10/9/2014 9:36:43 AM    Inj       :    1
                                           Inj Volume: 1 µl
Different Inj Volume from Sequence !      Actual Inj Volume : 12 µl
Acq. Method     : C:\CHEM32\1\DATA\RONG\NAOYUKI_LC 2014-10-09 07-45-20\RZ-5IPA-1ML-2013-.M
```

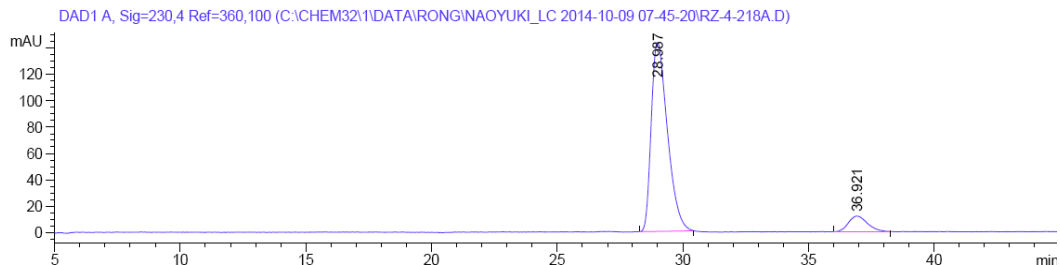

Signal 1: DAD1 A, Sig=230,4 Ref=360,100

| Peak # | RetTime [min] | Type | Width [min] | Area [mAU*s] | Height [mAU] | Area %  |
|--------|---------------|------|-------------|--------------|--------------|---------|
| 1      | 28.987        | BB   | 0.6492      | 6429.18652   | 143.35242    | 91.1065 |
| 2      | 36.921        | BB   | 0.6312      | 627.59711    | 11.86257     | 8.8935  |

Totals : 7056.78363 155.21498

RZ-4-180-H

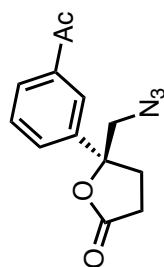

4h

<sup>1</sup>H NMR

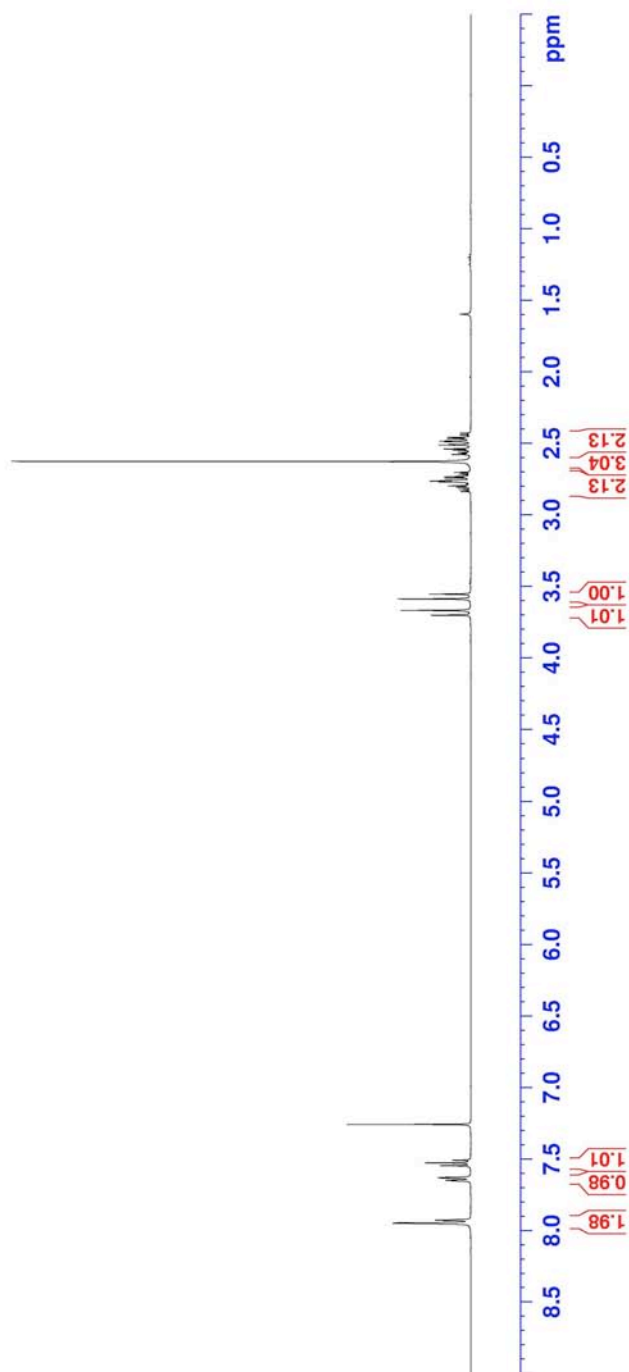

RZ-4-180-C

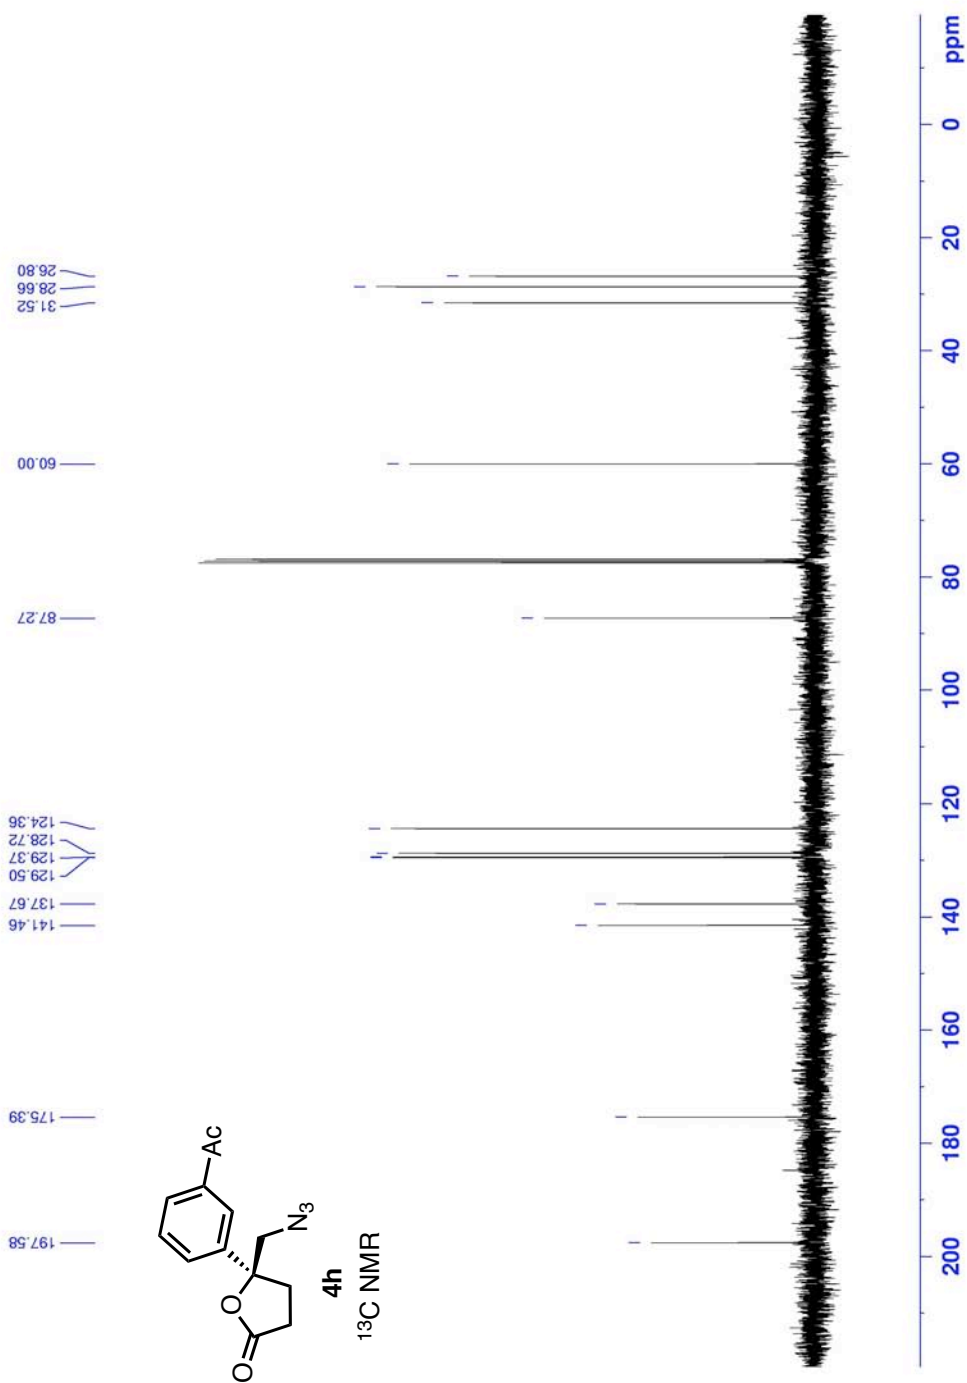



## HPLC traces for 4h:

Sample Name: RZ-4-180-RAC

```
=====
Acq. Operator   : RZ                      Seq. Line :    1
Acq. Instrument : Instrument 1             Location  : Vial 16
Injection Date  : 9/1/2014 1:01:22 PM      Inj       :    1
                                           Inj Volume: 1 µl
Different Inj Volume from Sequence !      Actual Inj Volume : 5 µl
Acq. Method     : C:\CHEM32\1\DATA\RONG\NAOYUKI_LC 2014-09-01 12-58-58\RZ-SHUTDOWN.M
```

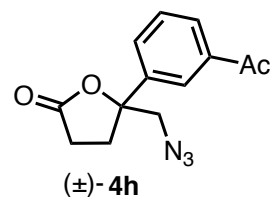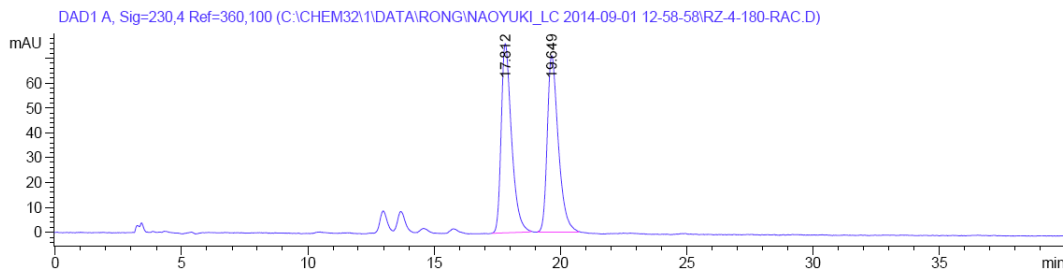

Signal 1: DAD1 A, Sig=230,4 Ref=360,100

| Peak # | RetTime [min] | Type | Width [min] | Area [mAU*s] | Height [mAU] | Area %  |
|--------|---------------|------|-------------|--------------|--------------|---------|
| 1      | 17.812        | BB   | 0.4240      | 2168.58911   | 76.19683     | 50.0957 |
| 2      | 19.649        | BB   | 0.4531      | 2160.30054   | 70.98513     | 49.9043 |

Totals : 4328.88965 147.18196

Sample Name: RZ-4-180

```
=====
Acq. Operator   : RZ                      Seq. Line :    1
Acq. Instrument : Instrument 1             Location  : Vial 16
Injection Date   : 7/29/2014 6:01:45 PM    Inj       :    1
                                           Inj Volume: 1 µl
Acq. Method     : C:\CHEM32\1\DATA\RONG\NAOYUKI_LC 2014-07-29 17-59-26\RZ-SHUTDOWN.M
```

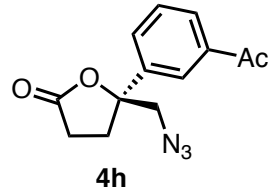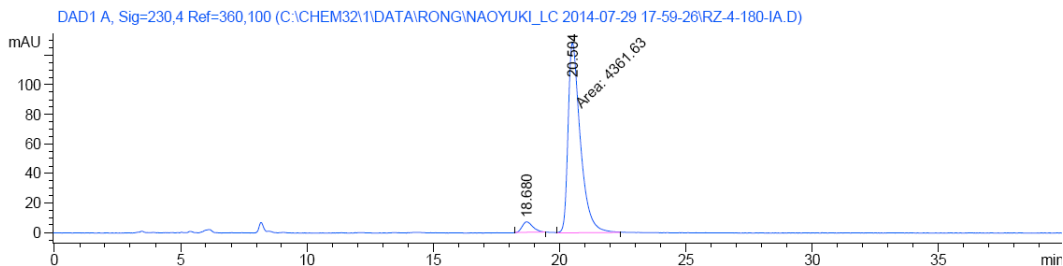

Signal 1: DAD1 A, Sig=230,4 Ref=360,100

| Peak # | RetTime [min] | Type | Width [min] | Area [mAU*s] | Height [mAU] | Area %  |
|--------|---------------|------|-------------|--------------|--------------|---------|
| 1      | 18.680        | BB   | 0.3921      | 219.16219    | 7.26251      | 4.7844  |
| 2      | 20.504        | MM   | 0.5649      | 4361.62939   | 128.67712    | 95.2156 |

Totals : 4580.79158 135.93964

R2-4-158-H

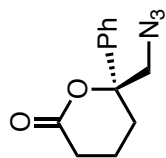

4i

$^1\text{H}$  NMR

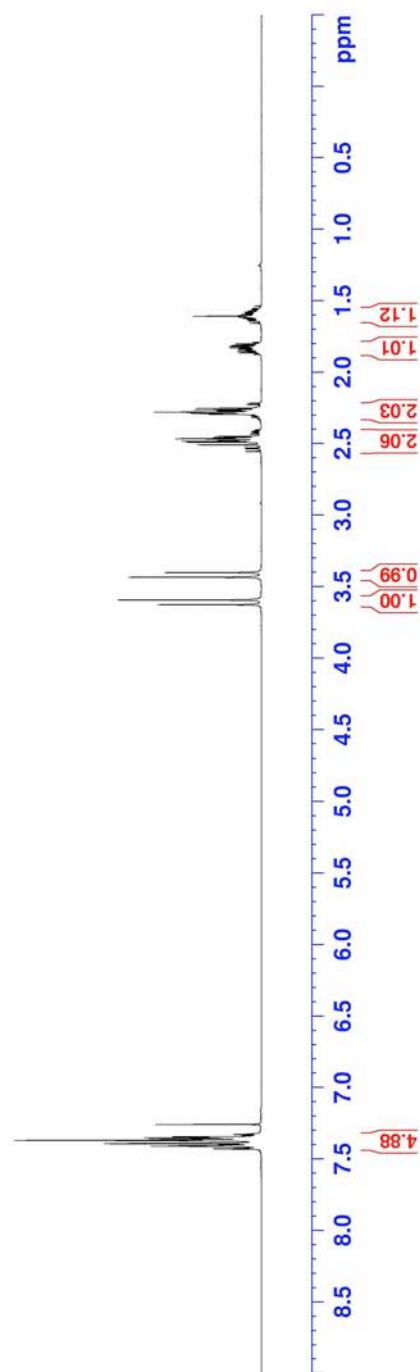

RZ-4-158-C

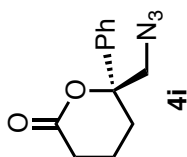

4i

<sup>13</sup>C NMR

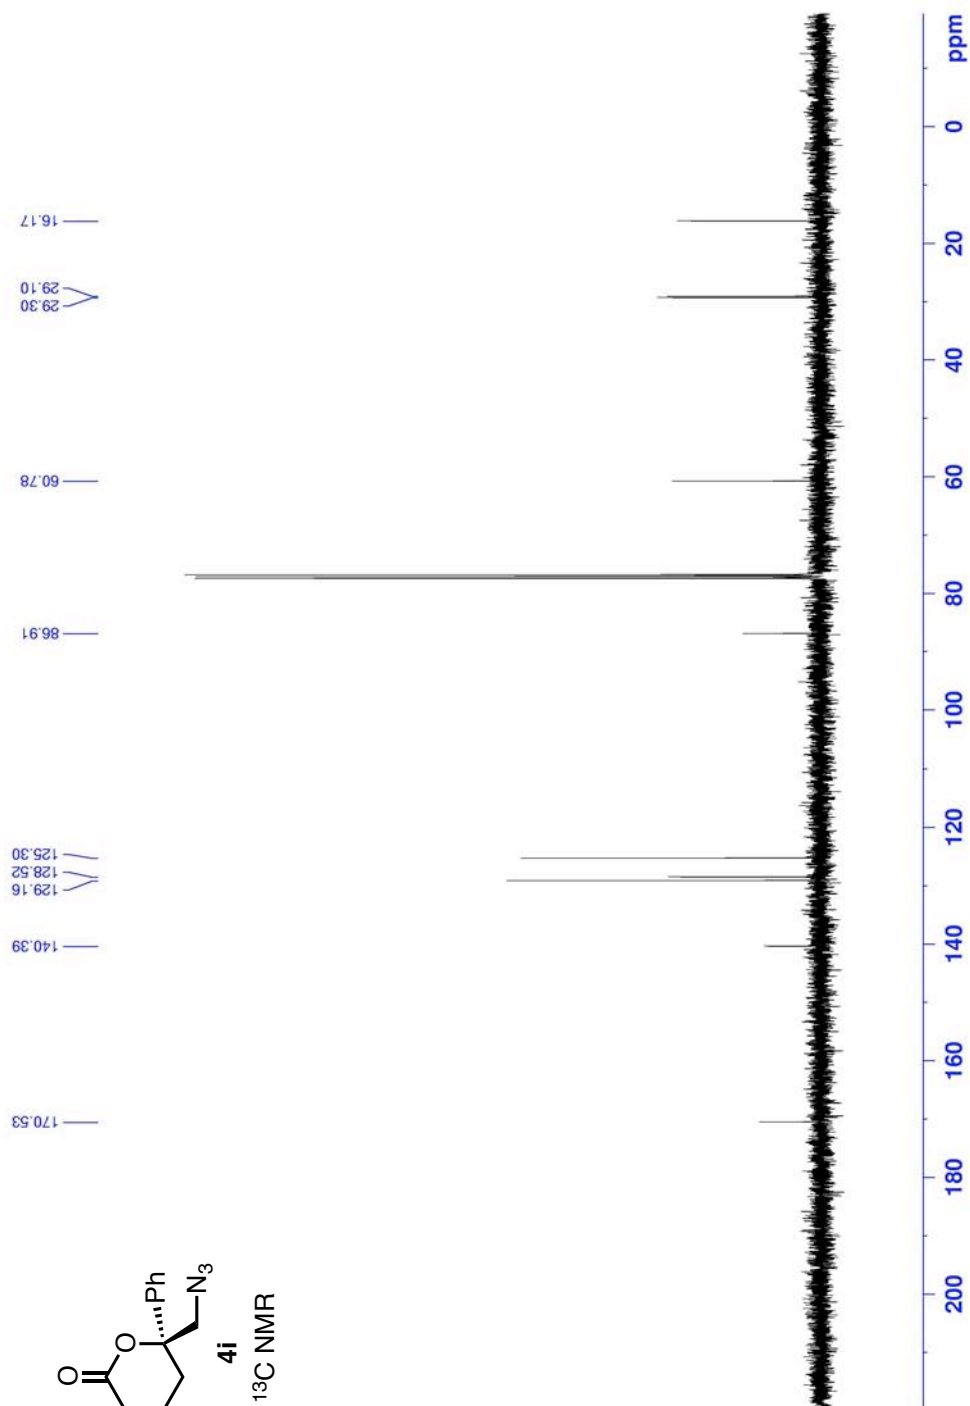

## HPLC traces for 4i:

Sample Name: RZ-4-158-rac

```
=====
Acq. Operator   : RZ                      Seq. Line :    1
Acq. Instrument : Instrument 1             Location  : Vial 17
Injection Date  : 6/6/2014 4:34:38 PM      Inj       :    1
                                           Inj Volume: 1 µl
Different Inj Volume from Sequence !      Actual Inj Volume : 3 µl
Acq. Method     : C:\CHEM32\1\DATA\RONG\NAOYUKI_LC 2014-06-06 16-33-29\RZ-5IPA-1ML-2013-.M
=====
```

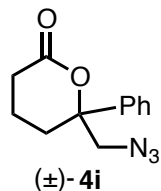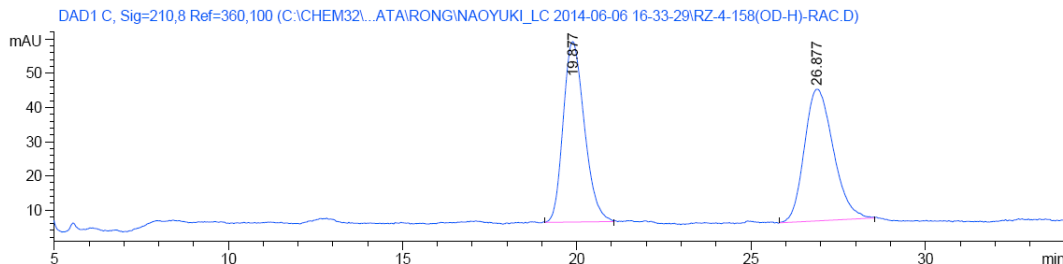

Signal 3: DAD1 C, Sig=210,8 Ref=360,100

| Peak # | RetTime [min] | Type | Width [min] | Area [mAU*s] | Height [mAU] | Area %  |
|--------|---------------|------|-------------|--------------|--------------|---------|
| 1      | 19.877        | VB   | 0.5830      | 2242.23364   | 52.84458     | 50.1395 |
| 2      | 26.877        | BB   | 0.6945      | 2229.76001   | 38.56628     | 49.8605 |

Totals : 4471.99365 91.41086

Sample Name: RZ-4-158

```
=====
Acq. Operator   : RZ                      Seq. Line :    3
Acq. Instrument : Instrument 1             Location  : Vial 16
Injection Date  : 6/6/2014 5:45:50 PM      Inj       :    1
                                           Inj Volume: 1 µl
Different Inj Volume from Sequence !      Actual Inj Volume : 0.8 µl
Acq. Method     : C:\CHEM32\1\DATA\RONG\NAOYUKI_LC 2014-06-06 16-33-29\RZ-5IPA-1ML-2013-.M
=====
```

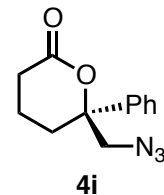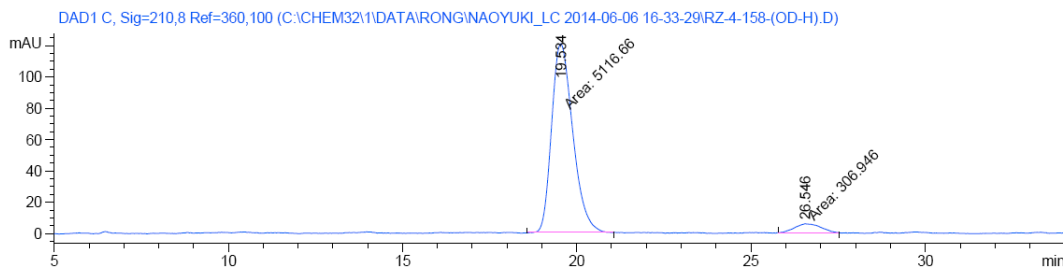

Signal 3: DAD1 C, Sig=210,8 Ref=360,100

| Peak # | RetTime [min] | Type | Width [min] | Area [mAU*s] | Height [mAU] | Area %  |
|--------|---------------|------|-------------|--------------|--------------|---------|
| 1      | 19.534        | MM   | 0.7066      | 5116.65674   | 120.68810    | 94.3405 |
| 2      | 26.546        | MM   | 0.8724      | 306.94647    | 5.86426      | 5.6595  |

Totals : 5423.60321 126.55235

RZ-4-208-H

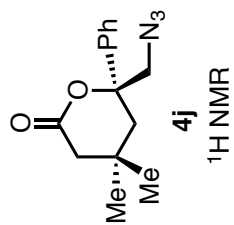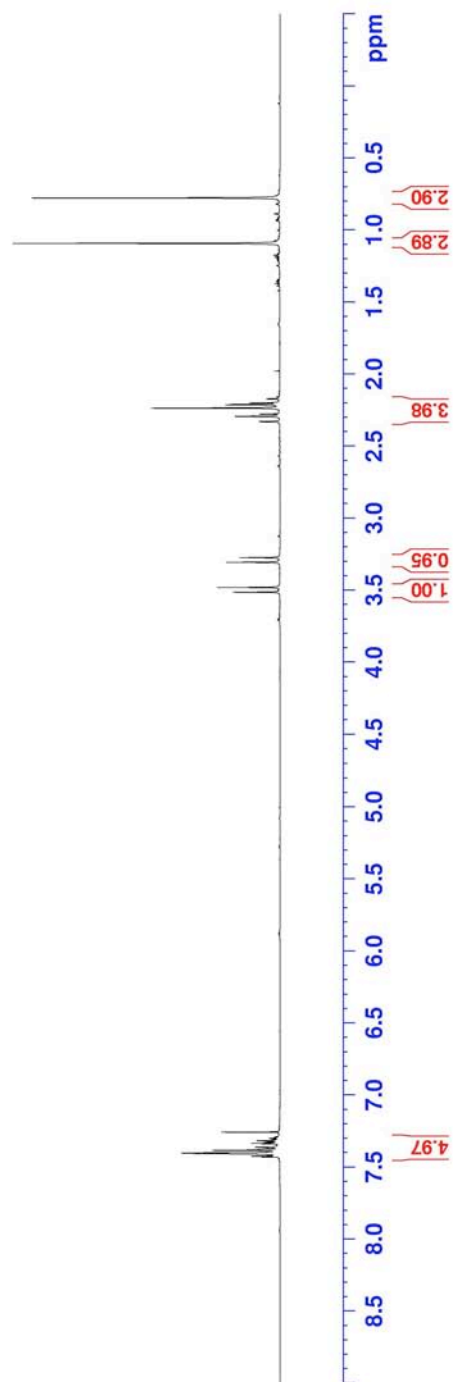

RZ-4-208-C

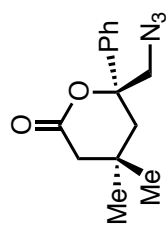

4j

<sup>13</sup>C NMR

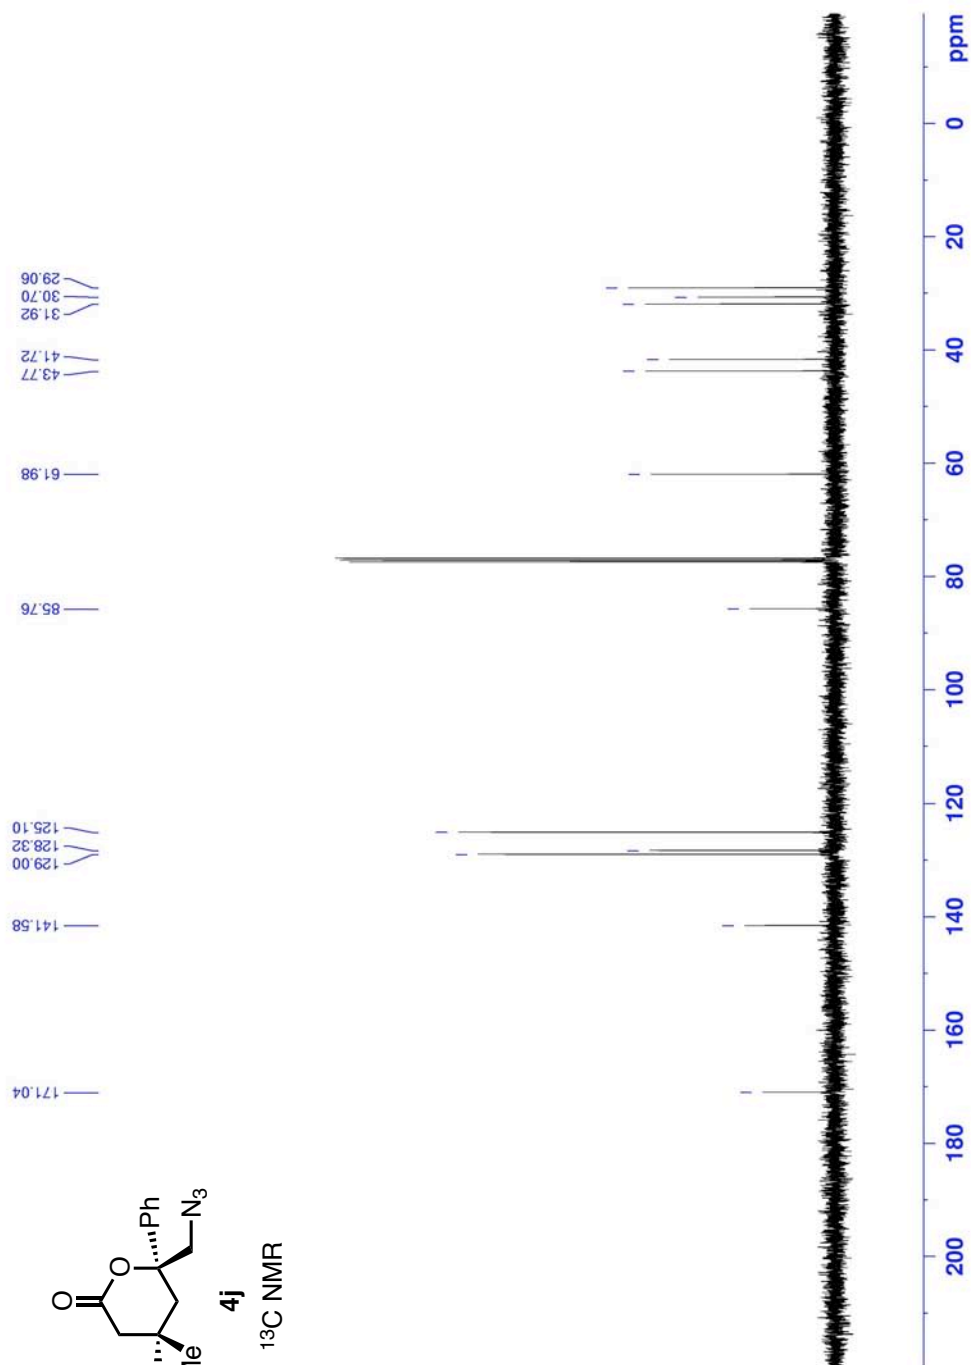

## HPLC traces for 4j:

Sample Name: RZ-4-208-RAC

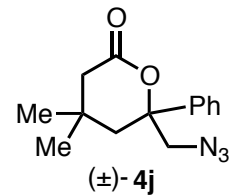

```
=====
Acq. Operator   : RZ                      Seq. Line :    1
Acq. Instrument : Instrument 1             Location  : Vial 16
Injection Date  : 9/16/2014 3:33:43 PM    Inj       :    1
                                           Inj Volume: 1 µl
Different Inj Volume from Sequence !      Actual Inj Volume : 4 µl
Acq. Method     : C:\CHEM32\1\DATA\RONG\ZY 2014-09-16 15-31-25\RZ-5IPA-1ML-2013-.M
```

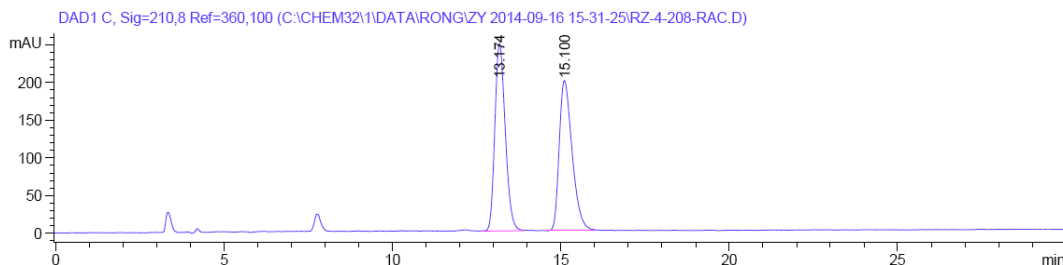

Signal 3: DAD1 C, Sig=210,8 Ref=360,100

| Peak # | RetTime [min] | Type | Width [min] | Area [mAU*s] | Height [mAU] | Area %  |
|--------|---------------|------|-------------|--------------|--------------|---------|
| 1      | 13.174        | VV   | 0.3313      | 5349.82373   | 248.41367    | 50.0666 |
| 2      | 15.100        | VV   | 0.4024      | 5335.59473   | 199.26160    | 49.9334 |

Totals : 1.06854e4 447.67526

Sample Name: RZ-4-208

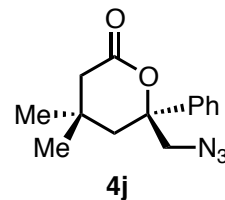

```
=====
Acq. Operator   : RZ                      Seq. Line :    2
Acq. Instrument : Instrument 1             Location  : Vial 17
Injection Date   : 9/16/2014 4:05:01 PM    Inj       :    1
                                           Inj Volume: 1 µl
Different Inj Volume from Sequence !      Actual Inj Volume : 3 µl
Acq. Method     : C:\CHEM32\1\DATA\RONG\ZY 2014-09-16 15-31-25\RZ-5IPA-1ML-2013-.M
```

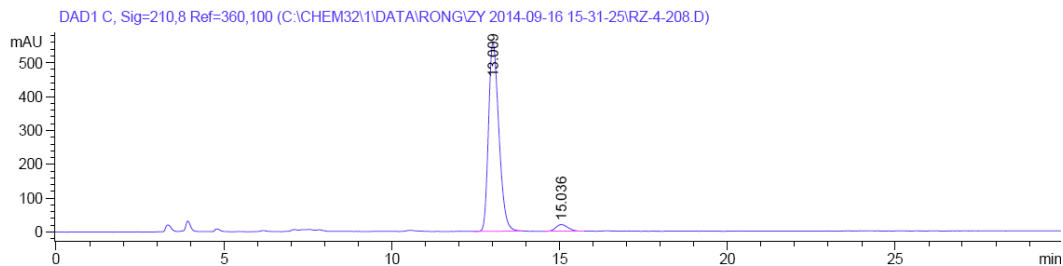

Signal 3: DAD1 C, Sig=210,8 Ref=360,100

| Peak # | RetTime [min] | Type | Width [min] | Area [mAU*s] | Height [mAU] | Area %  |
|--------|---------------|------|-------------|--------------|--------------|---------|
| 1      | 13.009        | VB   | 0.3308      | 1.19998e4    | 558.26044    | 95.8692 |
| 2      | 15.036        | BV   | 0.3174      | 517.04474    | 20.01099     | 4.1308  |

Totals : 1.25169e4 578.27143

RZ-4-188-H

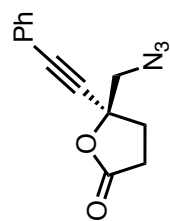

4k

<sup>1</sup>H NMR

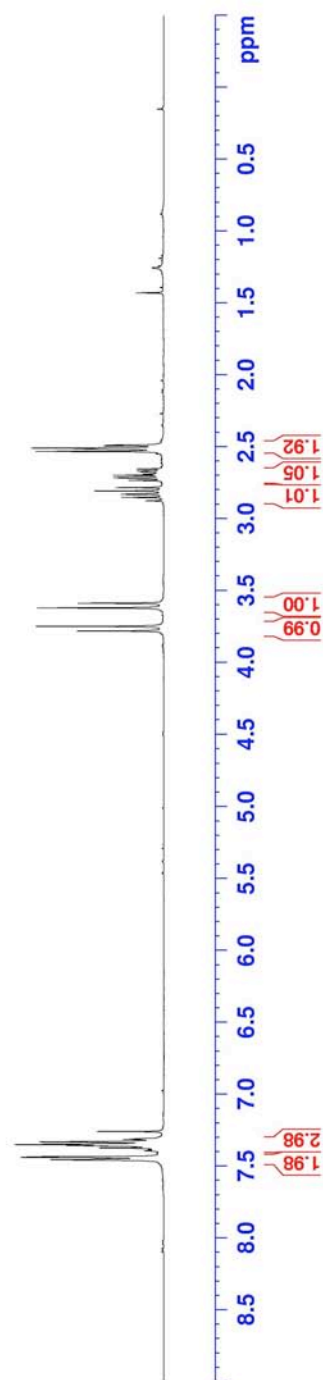



RZ-4-188-C

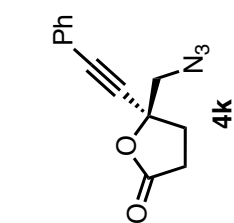

<sup>13</sup>C NMR

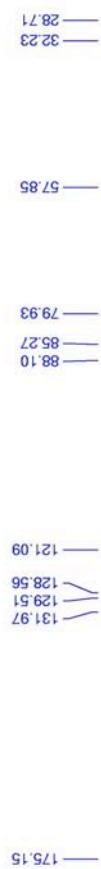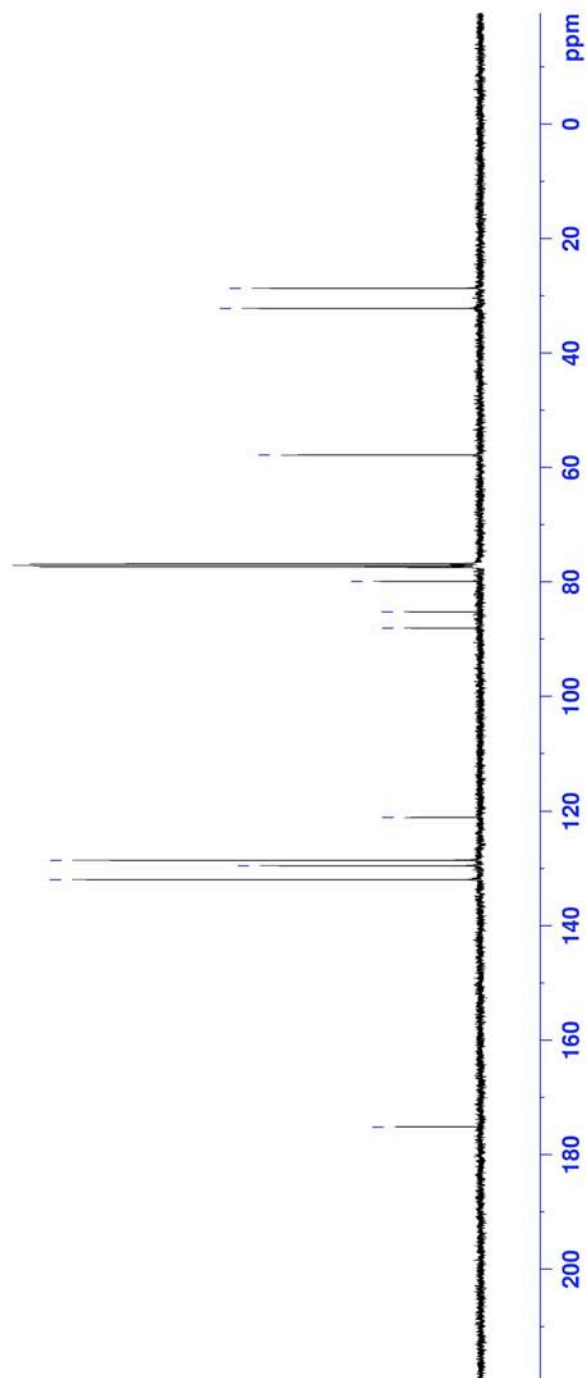

## HPLC traces for 4k:

Sample Name: RZ-4-188-RAC

```
=====
Acq. Operator   : RZ                               Seq. Line :    2
Acq. Instrument : Instrument 1                     Location  : Vial 16
Injection Date  : 8/25/2014 4:07:52 PM             Inj       :    1
                                                    Inj Volume: 1 µl
Different Inj Volume from Sequence !   Actual Inj Volume : 16 µl
Acq. Method     : C:\CHEM32\1\DATA\RONG\NAOYUKI_LC 2014-08-25 15-24-07\RZ-5IPA-1ML-2013-.M
```

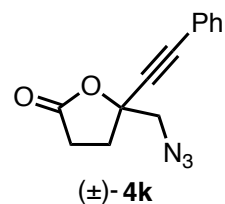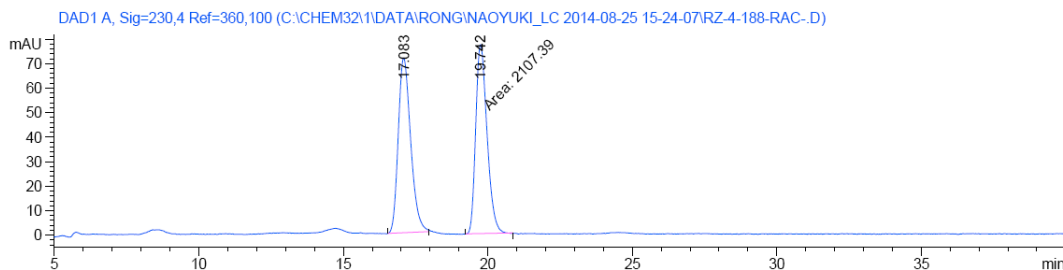

Signal 1: DAD1 A, Sig=230,4 Ref=360,100

| Peak # | RetTime [min] | Type | Width [min] | Area [mAU*s] | Height [mAU] | Area %  |
|--------|---------------|------|-------------|--------------|--------------|---------|
| 1      | 17.083        | BB   | 0.4547      | 2134.21069   | 71.40211     | 50.3162 |
| 2      | 19.742        | MM   | 0.4543      | 2107.38574   | 77.31142     | 49.6838 |

Totals : 4241.59644 148.71352

Sample Name: RZ-4-188

```
=====
Acq. Operator   : RZ                               Seq. Line :    1
Acq. Instrument : Instrument 1                     Location  : Vial 16
Injection Date   : 8/22/2014 3:24:11 PM             Inj       :    1
                                                    Inj Volume: 1 µl
Different Inj Volume from Sequence !   Actual Inj Volume : 4 µl
Acq. Method     : C:\CHEM32\1\DATA\RONG\NAOYUKI_LC 2014-08-22 15-21-53\RZ-5IPA-1ML-2013-.M
```

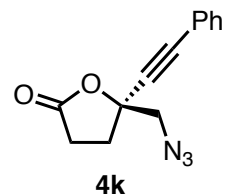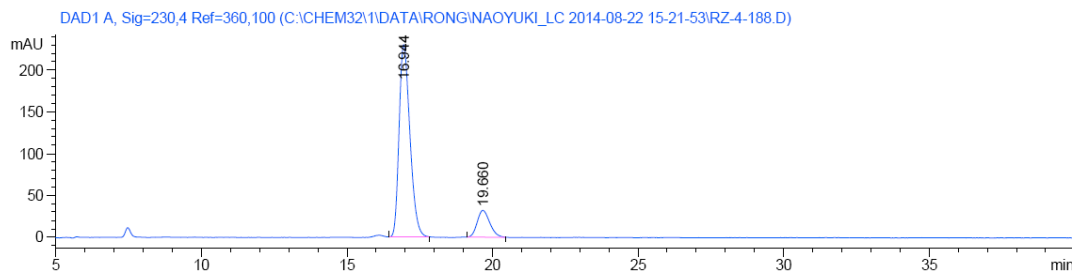

Signal 1: DAD1 A, Sig=230,4 Ref=360,100

| Peak # | RetTime [min] | Type | Width [min] | Area [mAU*s] | Height [mAU] | Area %  |
|--------|---------------|------|-------------|--------------|--------------|---------|
| 1      | 16.944        | VB   | 0.4069      | 5986.67236   | 230.57608    | 85.8726 |
| 2      | 19.660        | BB   | 0.4423      | 984.89868    | 32.43007     | 14.1274 |

Totals : 6971.57104 263.00615

RZ-4-194-H

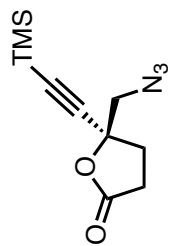

4I

<sup>1</sup>H NMR

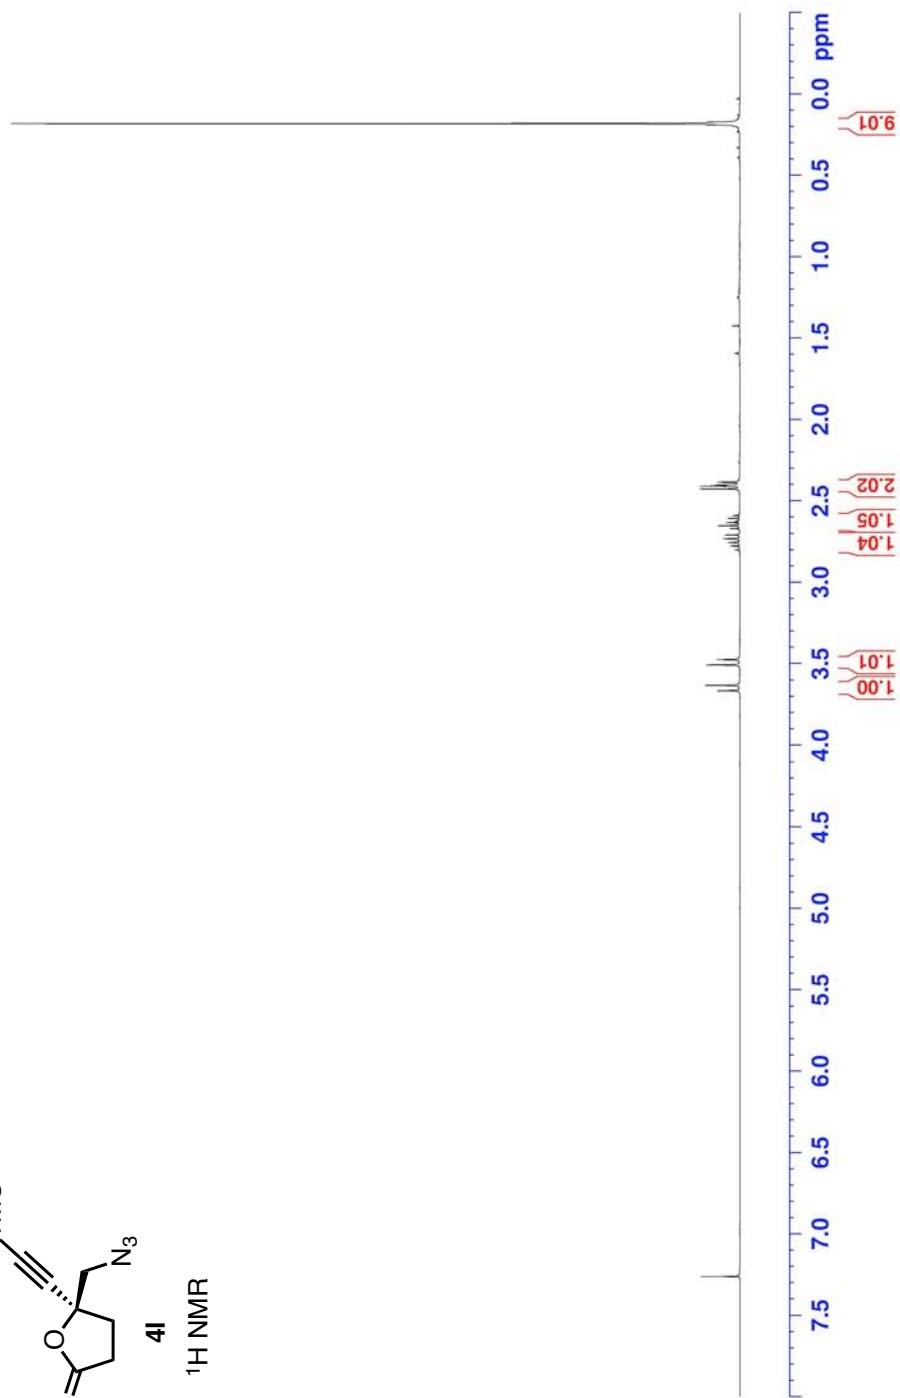

RZ-4-194-C

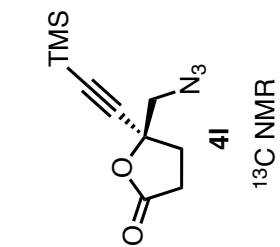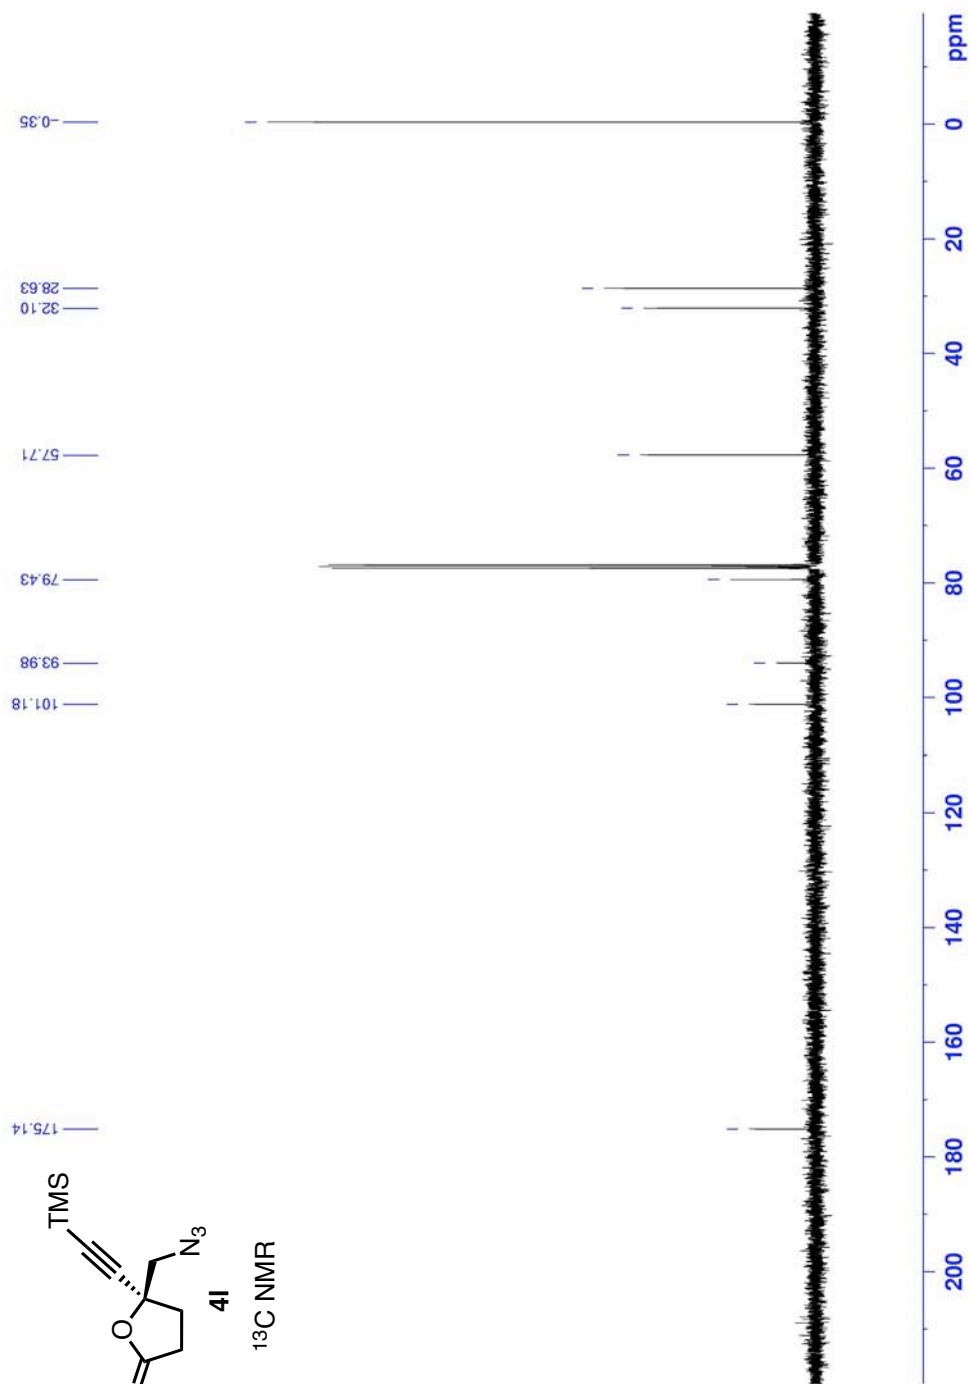

## HPLC traces for compound 4k derived from 4l:

Sample Name: RZ-4-188-RAC

```
=====
Acq. Operator   : RZ                               Seq. Line :    2
Acq. Instrument : Instrument 1                     Location  : Vial 16
Injection Date  : 8/25/2014 4:07:52 PM             Inj       :    1
                                                    Inj Volume: 1 µl
Different Inj Volume from Sequence !      Actual Inj Volume : 16 µl
Acq. Method     : C:\CHEM32\1\DATA\RONG\NAOYUKI_LC 2014-08-25 15-24-07\RZ-5IPA-1ML-2013-.M
```

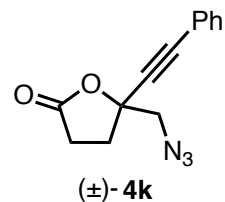

Signal 1: DAD1 A, Sig=230,4 Ref=360,100

| Peak # | RetTime [min] | Type | Width [min] | Area [mAU*s] | Height [mAU] | Area %  |
|--------|---------------|------|-------------|--------------|--------------|---------|
| 1      | 17.083        | BB   | 0.4547      | 2134.21069   | 71.40211     | 50.3162 |
| 2      | 19.742        | MM   | 0.4543      | 2107.38574   | 77.31142     | 49.6838 |

Totals : 4241.59644 148.71352

Sample Name: RZ-4-195

```
=====
Acq. Operator   : RZ                               Seq. Line :    2
Acq. Instrument : Instrument 1                     Location  : Vial 16
Injection Date   : 9/2/2014 6:38:01 PM             Inj       :    1
                                                    Inj Volume: 1 µl
Different Inj Volume from Sequence !      Actual Inj Volume : 4 µl
Acq. Method     : C:\CHEM32\1\DATA\RONG\ZY 2014-09-02 17-54-08\RZ-5IPA-1ML-2013-.M
```

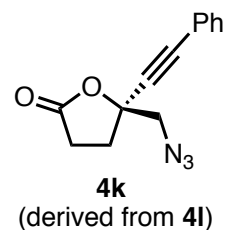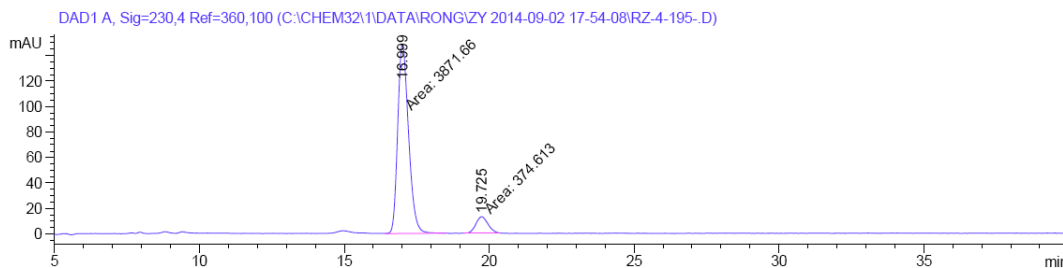

Signal 1: DAD1 A, Sig=230,4 Ref=360,100

| Peak # | RetTime [min] | Type | Width [min] | Area [mAU*s] | Height [mAU] | Area %  |
|--------|---------------|------|-------------|--------------|--------------|---------|
| 1      | 16.999        | MM   | 0.4347      | 3871.66455   | 148.43346    | 91.1778 |
| 2      | 19.725        | MM   | 0.4853      | 374.61334    | 12.86601     | 8.8222  |

Totals : 4246.27789 161.29947

RZ-4-202-H

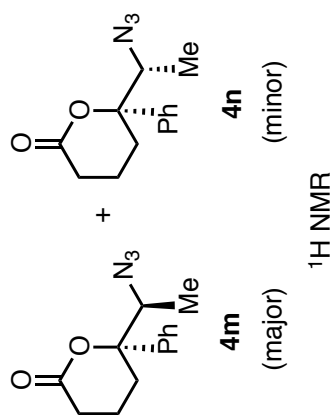

$^1\text{H}$  NMR

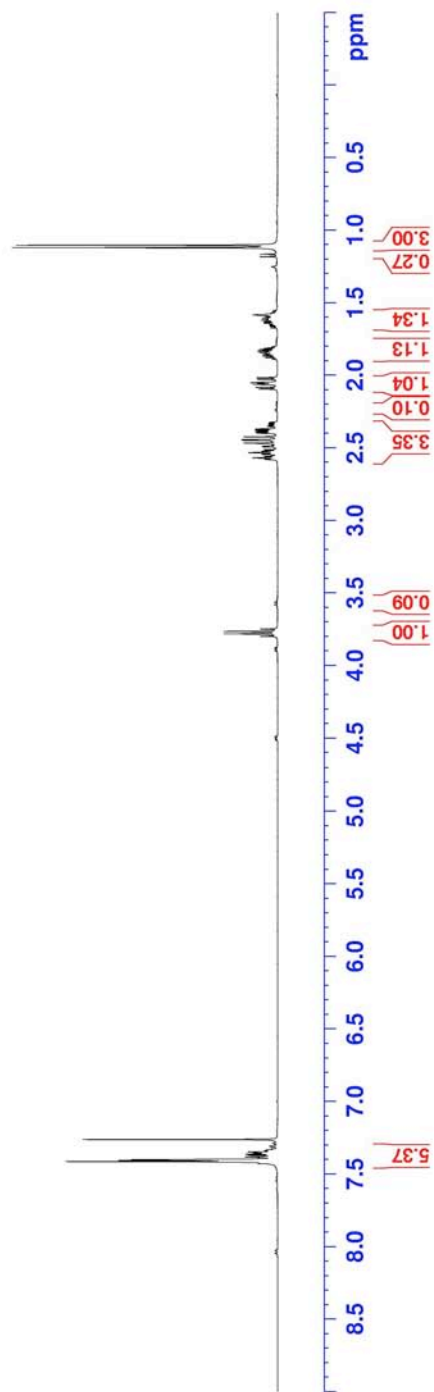

RZ\_4-202-C

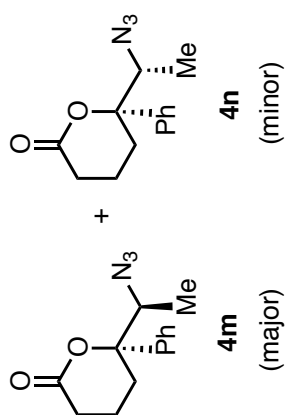

13.03  
 13.99  
 16.21  
 27.98  
 29.28  
 29.61  
 29.79

64.14  
 65.02

88.53  
 88.83

125.52  
 126.47  
 128.23  
 128.45  
 128.82  
 129.07  
 138.82  
 140.57

170.65  
 170.77

<sup>13</sup>C NMR

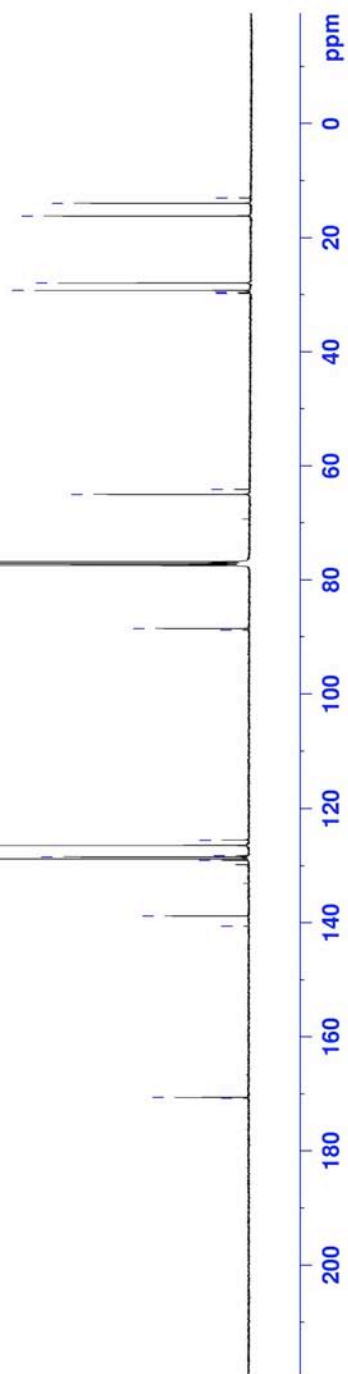

## HPLC traces for 4m and 4n:

Sample Name: RZ-4-198

```
=====
Acq. Operator   : RZ                      Seq. Line :    1
Acq. Instrument : Instrument 1             Location  : Vial 15
Injection Date  : 9/5/2014 2:42:58 PM      Inj       :    1
                                           Inj Volume: 1 µl
Different Inj Volume from Sequence !      Actual Inj Volume: 10 µl
Acq. Method     : C:\CHEM32\1\DATA\RONG\ZY 2014-09-05 14-40-24\RZ-3-IPA-08ML-ETOH.M
=====
```

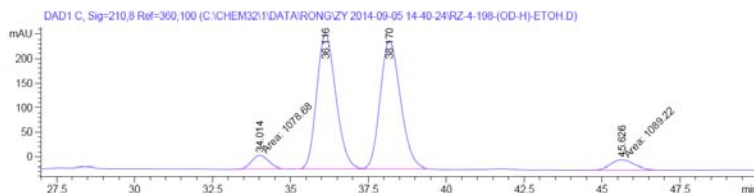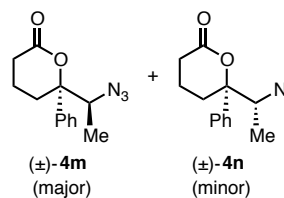

Signal 3: DAD1 C, Sig=210,8 Ref=360,100

| Peak # | RetTime [min] | Type | Width [min] | Area [mAU*s] | Height [mAU] | Area %  |
|--------|---------------|------|-------------|--------------|--------------|---------|
| 1      | 34.014        | MM   | 0.6350      | 1078.68335   | 28.31096     | 4.1476  |
| 2      | 36.116        | BB   | 0.6560      | 1.18816e4    | 275.04449    | 45.6854 |
| 3      | 38.170        | BB   | 0.6922      | 1.19579e4    | 262.13486    | 45.9789 |
| 4      | 45.626        | MM   | 0.8747      | 1089.22266   | 20.75443     | 4.1881  |

Totals : 2.60074e4 586.24474

Sample Name: RZ-4-202A

```
=====
Acq. Operator   : RZ                      Seq. Line :    2
Acq. Instrument : Instrument 1             Location  : Vial 16
Injection Date  : 9/5/2014 3:39:26 PM      Inj       :    1
                                           Inj Volume: 1 µl
Different Inj Volume from Sequence !      Actual Inj Volume: 14 µl
Acq. Method     : C:\CHEM32\1\DATA\RONG\ZY 2014-09-05 14-40-24\RZ-3-IPA-08ML-ETOH.M
=====
```

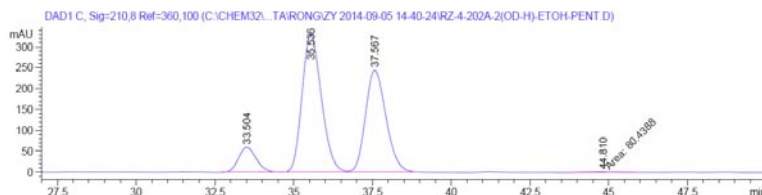

from (E)-2m

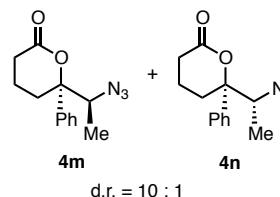

Signal 3: DAD1 C, Sig=210,8 Ref=360,100

| Peak # | RetTime [min] | Type | Width [min] | Area [mAU*s] | Height [mAU] | Area %  |
|--------|---------------|------|-------------|--------------|--------------|---------|
| 1      | 33.504        | BB   | 0.5563      | 2393.19165   | 59.87408     | 8.6433  |
| 2      | 35.536        | BV   | 0.6450      | 1.41347e4    | 329.12018    | 51.0492 |
| 3      | 37.567        | VB   | 0.6900      | 1.10800e4    | 243.89116    | 40.0169 |
| 4      | 44.810        | MM   | 1.0080      | 80.43877     | 1.32959      | 0.2905  |

Totals : 2.76884e4 634.21541

Sample Name: RZ-4-202B

```
=====
Acq. Operator   : RZ                      Seq. Line :    3
Acq. Instrument : Instrument 1             Location  : Vial 17
Injection Date  : 9/5/2014 4:34:11 PM      Inj       :    1
                                           Inj Volume: 1 µl
Different Inj Volume from Sequence !      Actual Inj Volume: 20 µl
Acq. Method     : C:\CHEM32\1\DATA\RONG\ZY 2014-09-05 14-40-24\RZ-3-IPA-08ML-ETOH.M
=====
```

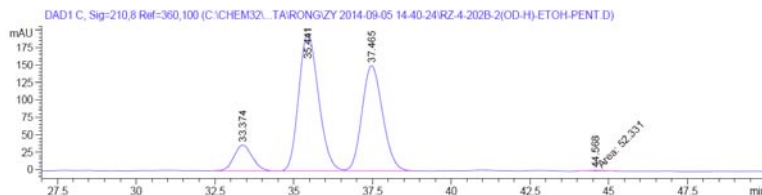

from (Z)-2m

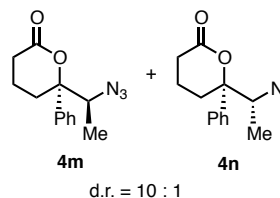

Signal 3: DAD1 C, Sig=210,8 Ref=360,100

| Peak # | RetTime [min] | Type | Width [min] | Area [mAU*s] | Height [mAU] | Area %  |
|--------|---------------|------|-------------|--------------|--------------|---------|
| 1      | 33.374        | BB   | 0.4942      | 1512.04651   | 37.04641     | 8.8356  |
| 2      | 35.441        | BB   | 0.6560      | 8655.40430   | 197.23421    | 50.5775 |
| 3      | 37.465        | BB   | 0.6805      | 6893.37061   | 151.03995    | 40.2811 |
| 4      | 44.568        | MM   | 0.6933      | 52.33103     | 1.25798      | 0.3058  |

Totals : 1.71132e4 386.57854



RZ-4-84-H

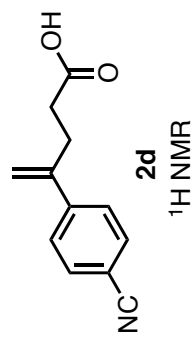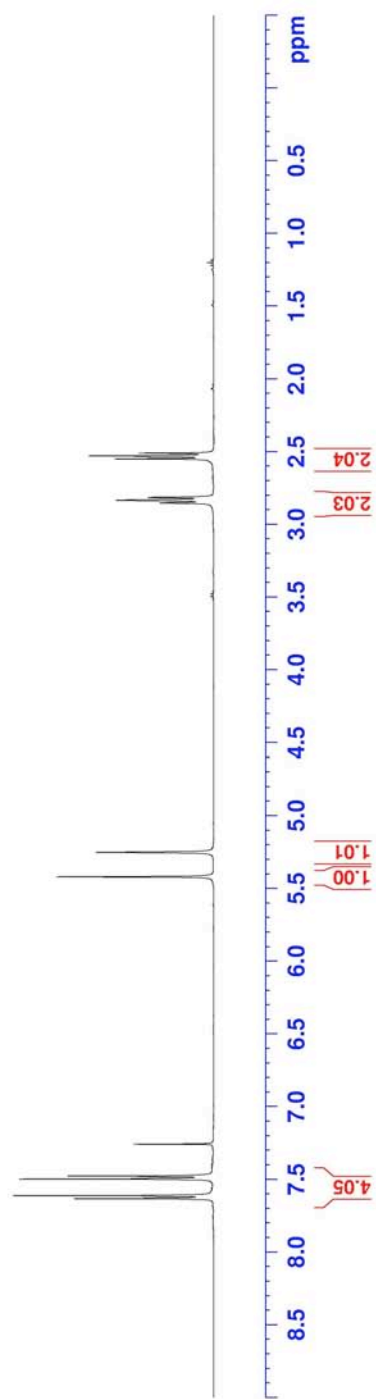

RZ-4-84-C

178.94

145.22  
145.20

132.42  
126.88

118.86  
115.95  
111.40

32.77  
29.72

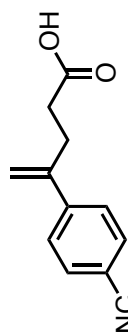

**2d**

<sup>13</sup>C NMR

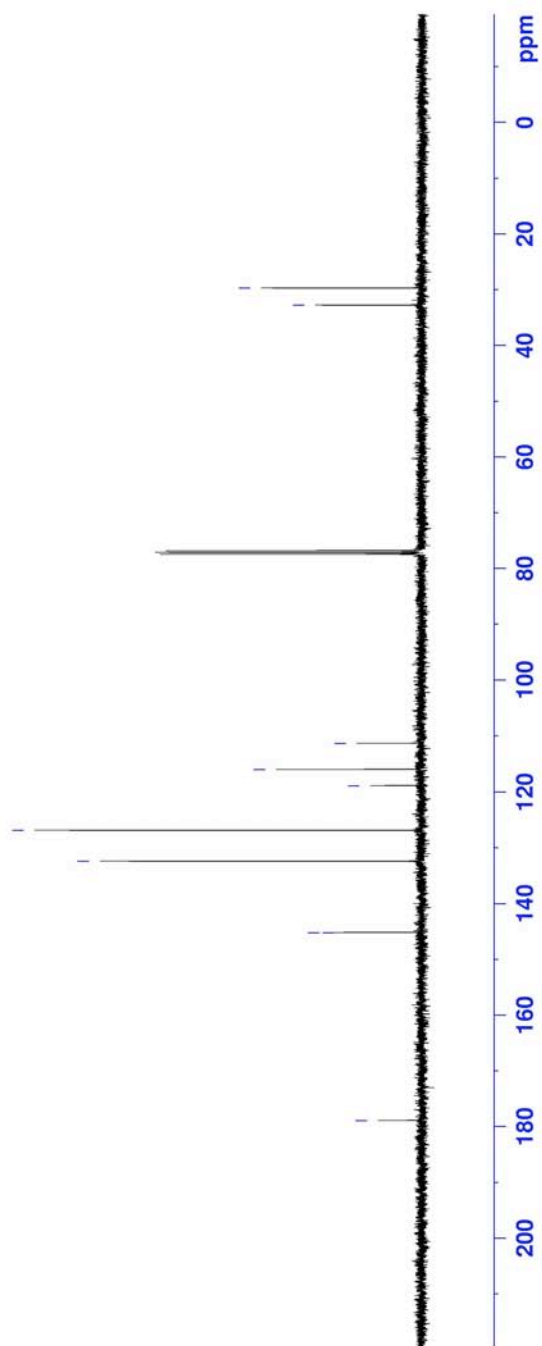

RZ-4-162r2-H

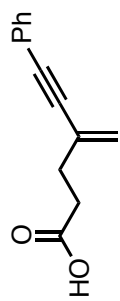

2k

<sup>1</sup>H NMR

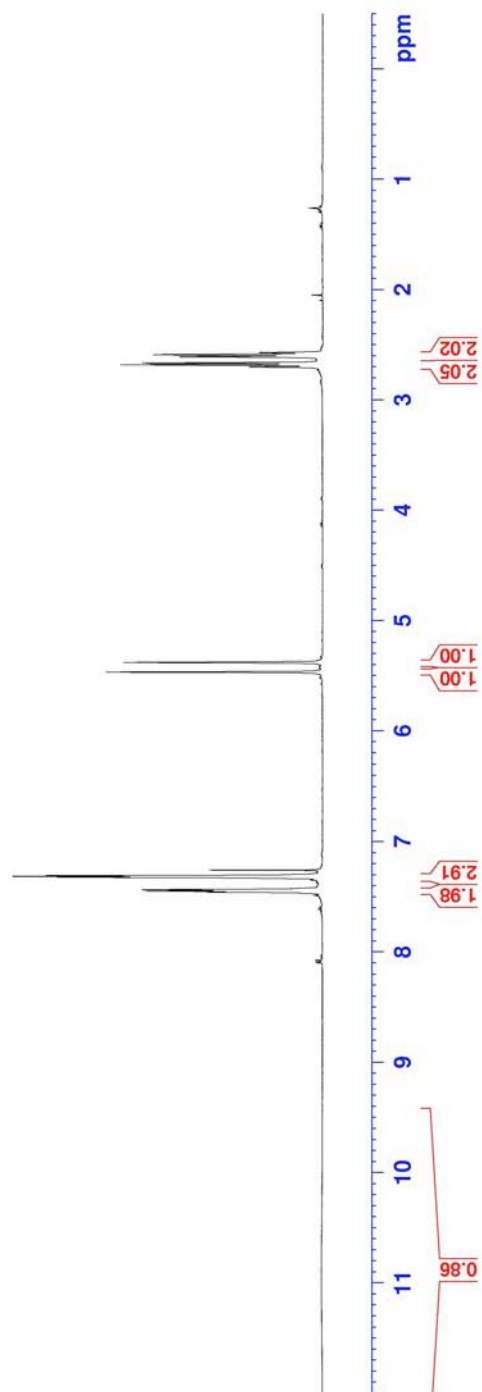

RZ-4-162r2-C

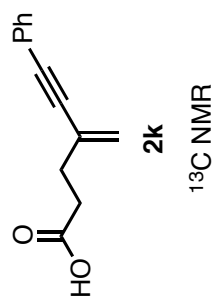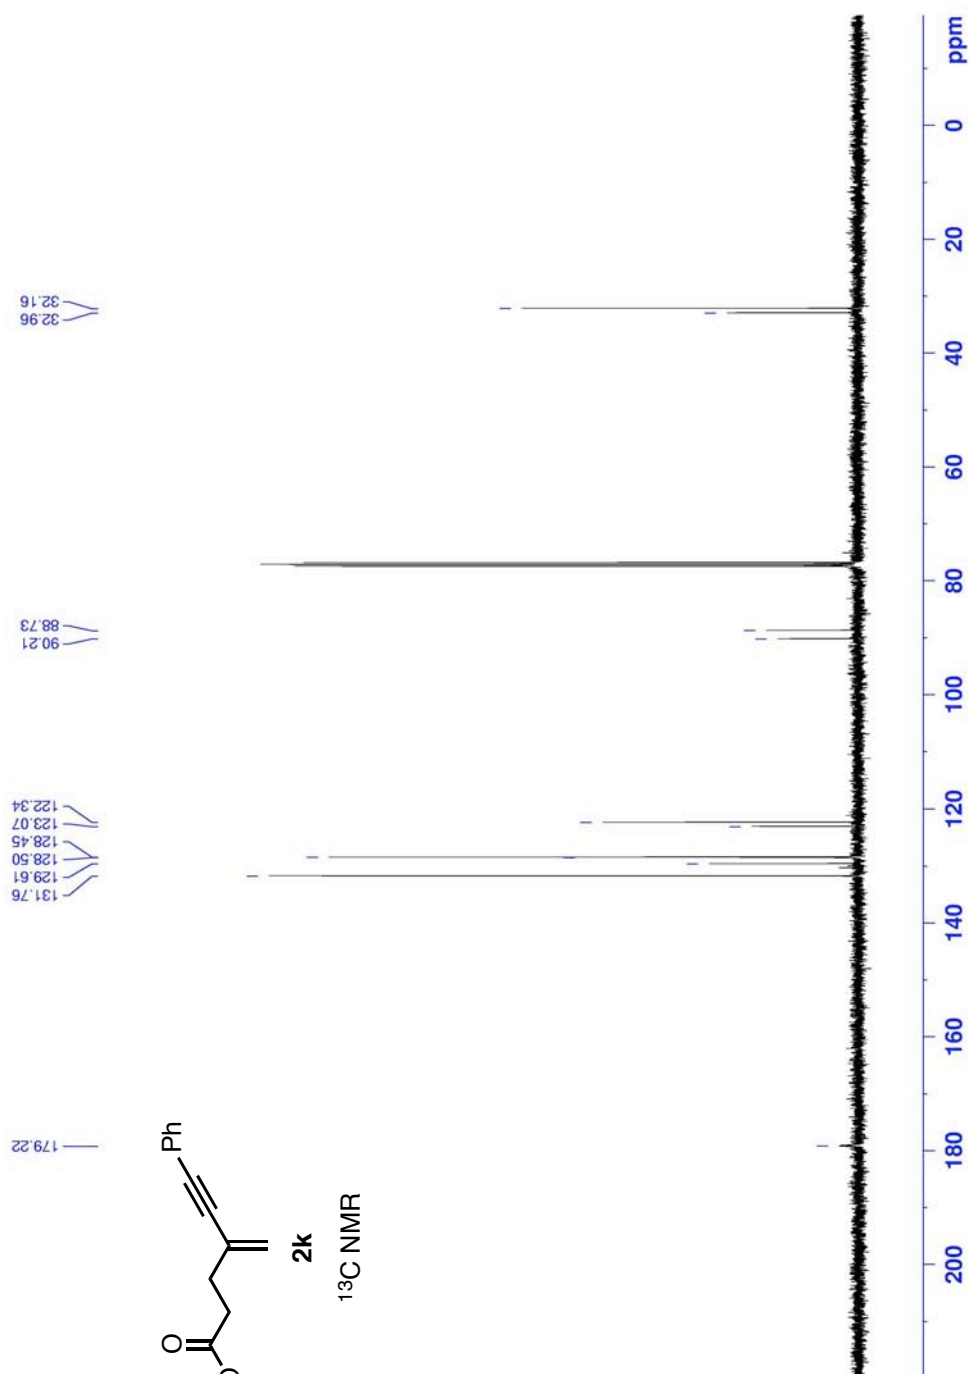

RZ-4-135-H

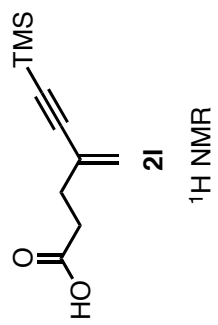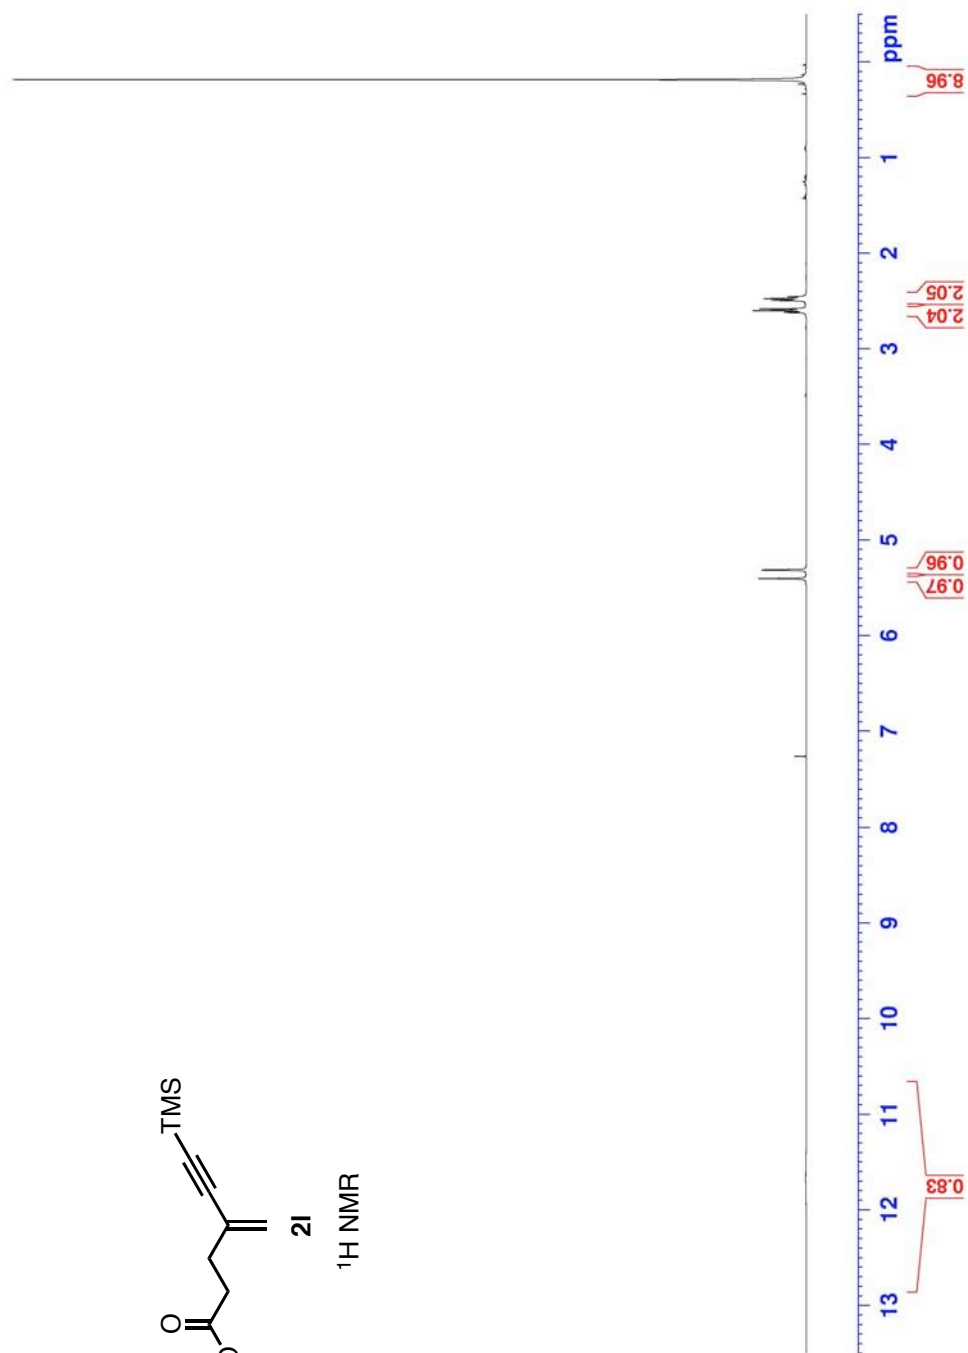

RZ-4-135-C

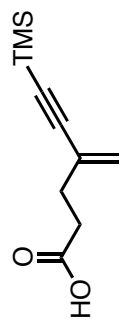

21

$^{13}\text{C}$  NMR

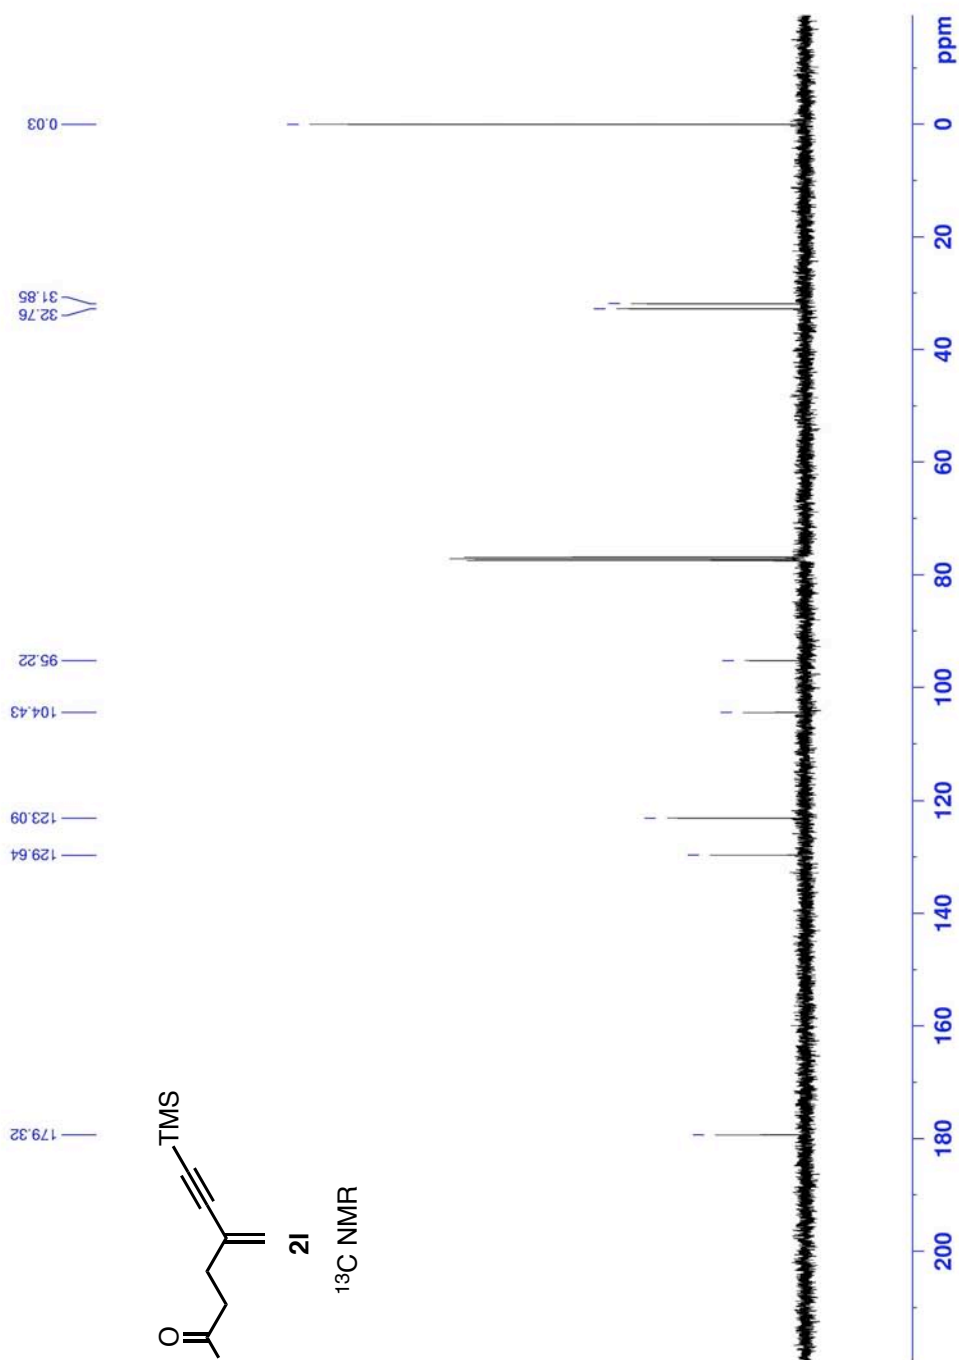

RZ-4-174-H (methanol-d4)

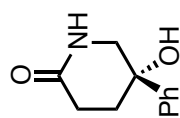

5

<sup>1</sup>H NMR  
(CD<sub>3</sub>OD)

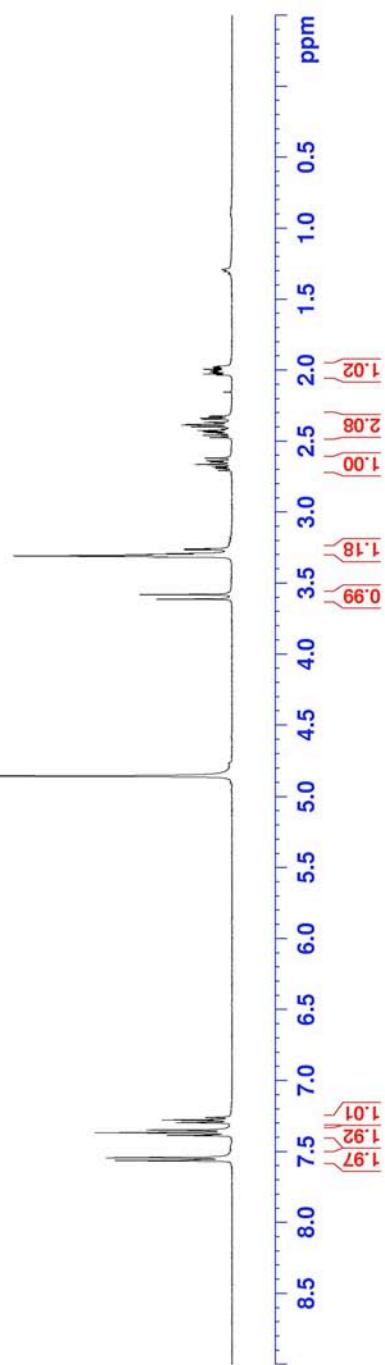

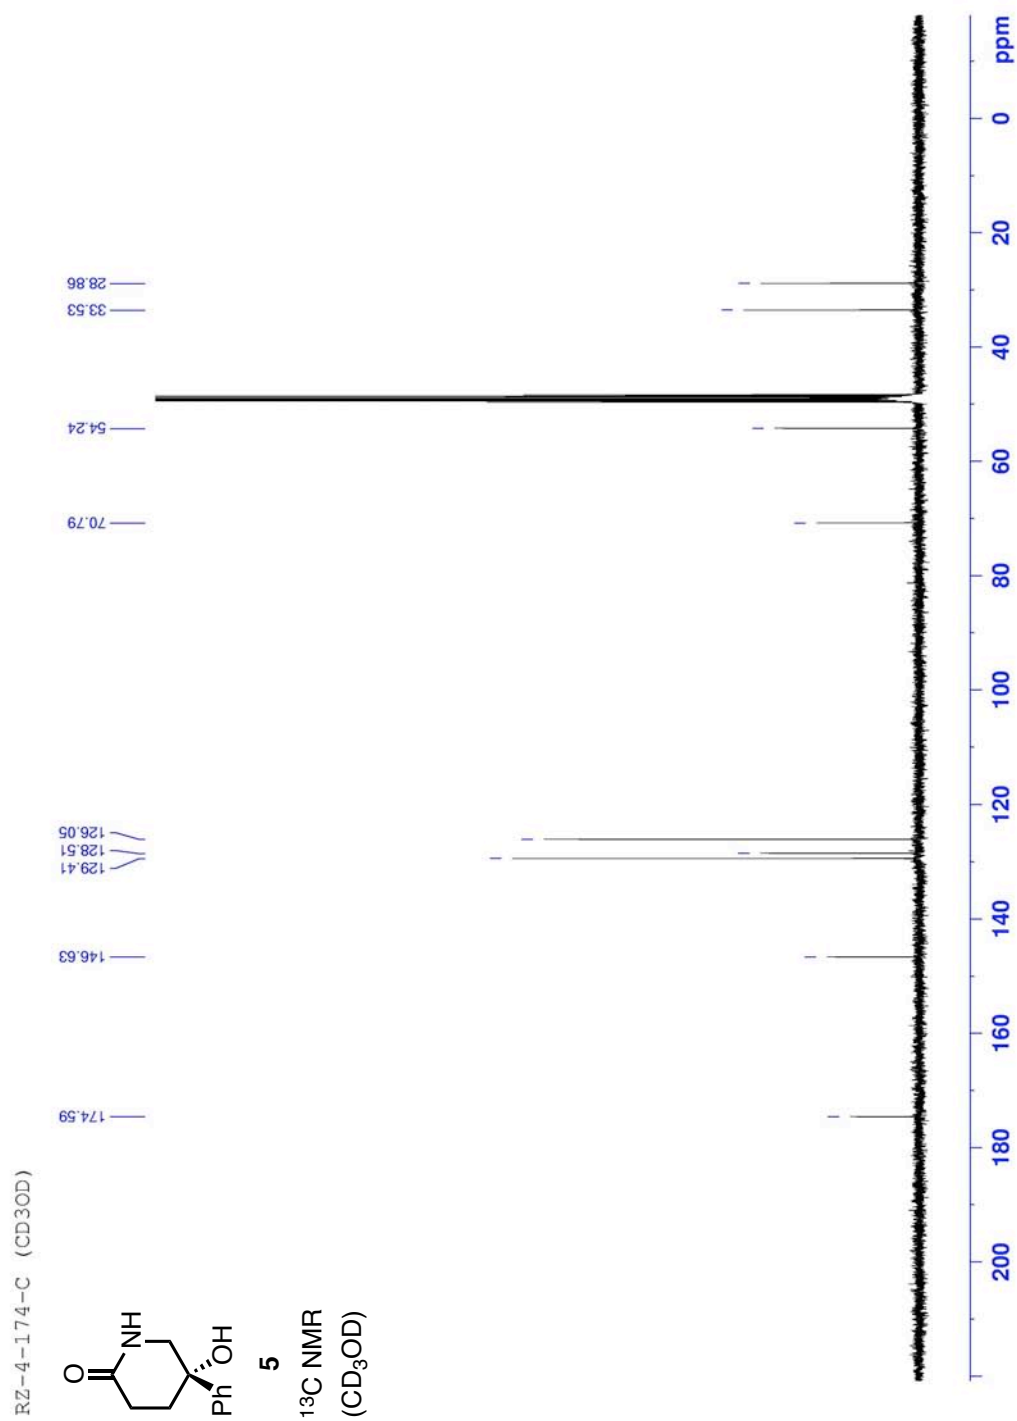



## HPLC traces for 5:

Sample Name: RZ-4-174-RAC

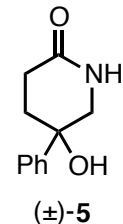

```
=====
Acq. Operator   : RZ                      Seq. Line :    1
Acq. Instrument : Instrument 1             Location  : Vial 16
Injection Date  : 7/30/2014 1:08:06 PM     Inj       :    1
                                           Inj Volume: 1 µl
Different Inj Volume from Sequence !      Actual Inj Volume : 4 µl
Acq. Method     : C:\CHEM32\1\DATA\RONG\NAOYUKI_LC 2014-07-30 13-05-43\RZ-5IPA-2014-70MIN.M
```

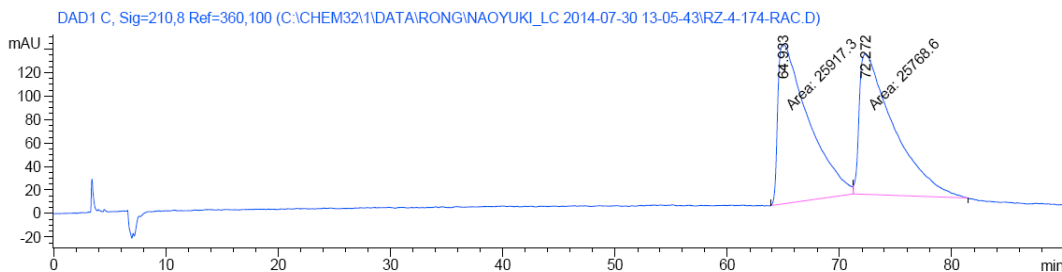

Signal 3: DAD1 C, Sig=210,8 Ref=360,100

| Peak # | RetTime [min] | Type | Width [min] | Area [mAU*s] | Height [mAU] | Area %  |
|--------|---------------|------|-------------|--------------|--------------|---------|
| 1      | 64.933        | MM   | 3.1716      | 2.59173e4    | 136.19344    | 50.1438 |
| 2      | 72.272        | MM   | 3.5883      | 2.57686e4    | 119.68867    | 49.8562 |

Totals : 5.16859e4 255.88211

Sample Name: RZ-4-174

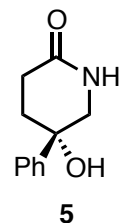

```
=====
Acq. Operator   : RZ                      Seq. Line :    3
Acq. Instrument : Instrument 1             Location  : Vial 16
Injection Date   : 7/22/2014 9:31:20 PM    Inj       :    1
                                           Inj Volume: 1 µl
Different Inj Volume from Sequence !      Actual Inj Volume : 8 µl
Acq. Method     : C:\CHEM32\1\DATA\RONG\NAOYUKI_LC 2014-07-22 18-26-42\RZ-5IPA-2014-70MIN.M
```

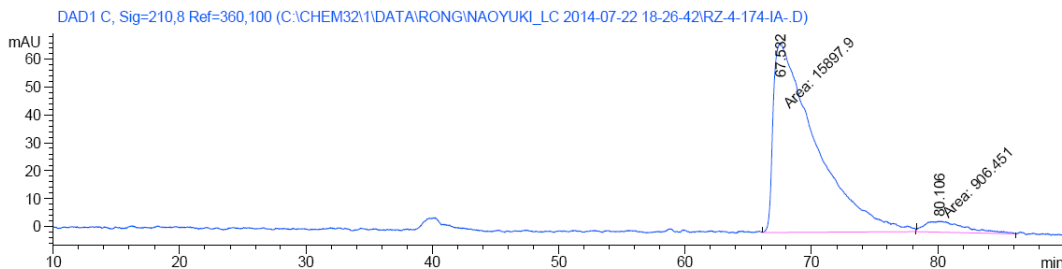

Signal 3: DAD1 C, Sig=210,8 Ref=360,100

| Peak # | RetTime [min] | Type | Width [min] | Area [mAU*s] | Height [mAU] | Area %  |
|--------|---------------|------|-------------|--------------|--------------|---------|
| 1      | 67.532        | MM   | 3.8921      | 1.58979e4    | 68.07827     | 94.6059 |
| 2      | 80.106        | MM   | 3.7487      | 906.45111    | 4.03003      | 5.3941  |

Totals : 1.68044e4 72.10830

RZ-4-220-H

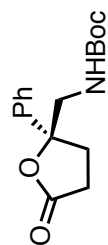

6

<sup>1</sup>H NMR

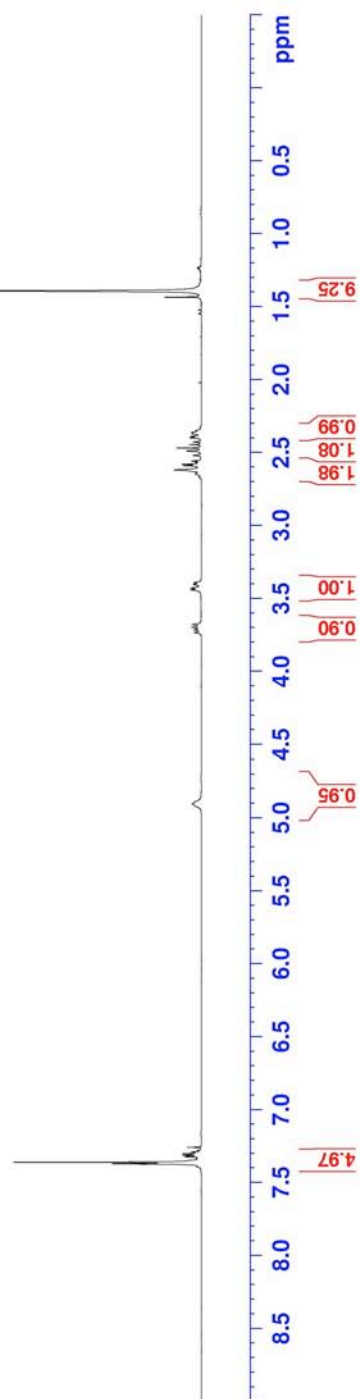

RZ-4-220-C

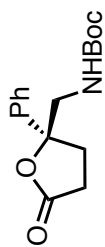

**6**

<sup>13</sup>C NMR

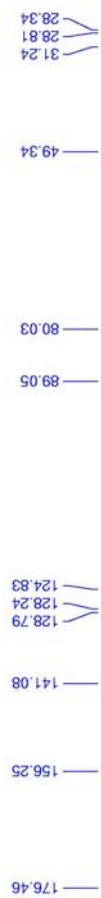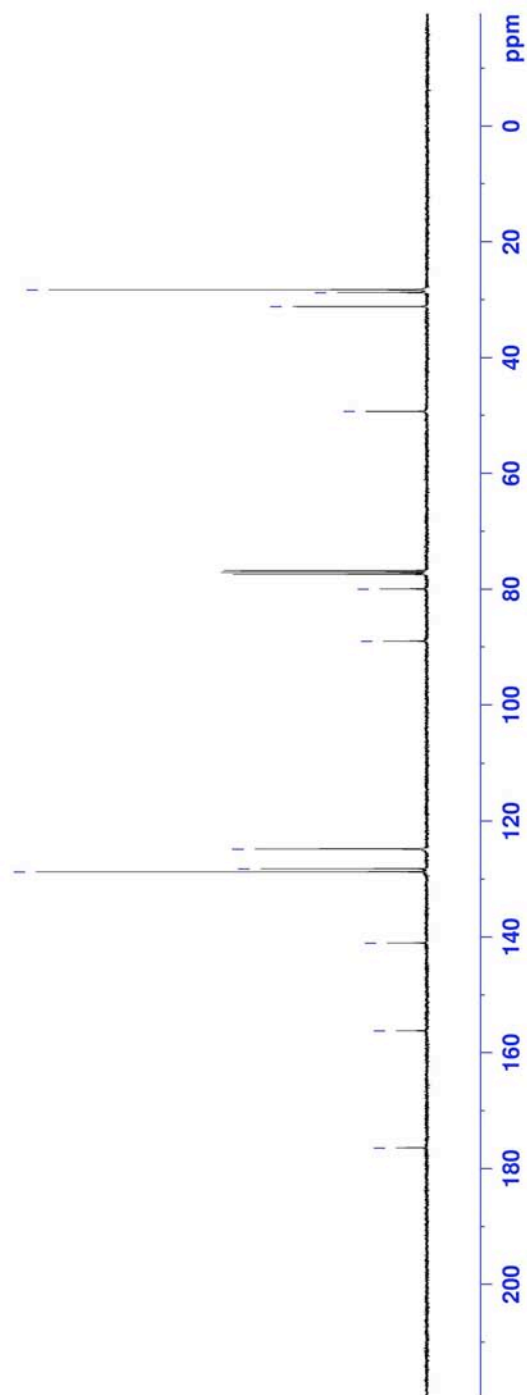

## HPLC traces for 6:

Data File C:\CHEM32\1\DATA\RONG\NAOYUKI\_LC 2014-10-14 08-32-32\RZ-4-220-RAC-.D  
Sample Name: RZ-4-220-RAC

```
=====
Acq. Operator   : RZ                      Seq. Line :    2
Acq. Instrument : Instrument 1             Location  : Vial 16
Injection Date  : 10/14/2014 8:56:28 AM    Inj       :    1
                                           Inj Volume: 1 µl
Different Inj Volume from Sequence !      Actual Inj Volume : 3 µl
Acq. Method     : C:\CHEM32\1\DATA\RONG\NAOYUKI_LC 2014-10-14 08-32-32\RZ-SHUTDOWN.M
```

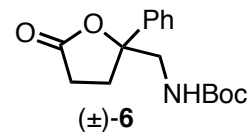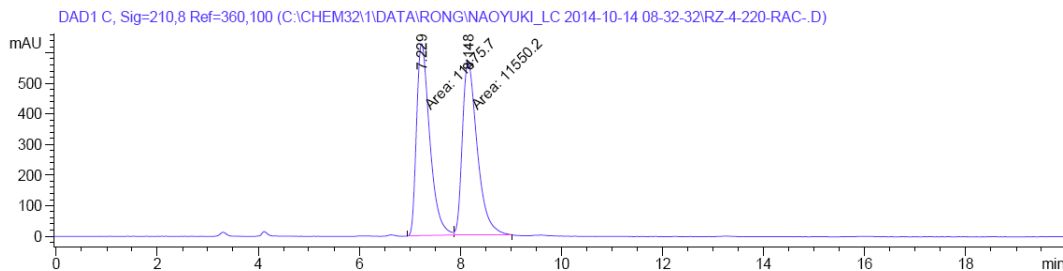

Signal 3: DAD1 C, Sig=210,8 Ref=360,100

| Peak # | RetTime [min] | Type | Width [min] | Area [mAU*s] | Height [mAU] | Area %  |
|--------|---------------|------|-------------|--------------|--------------|---------|
| 1      | 7.229         | MM   | 0.3042      | 1.14757e4    | 628.67841    | 49.8381 |
| 2      | 8.148         | MM   | 0.3413      | 1.15502e4    | 564.09924    | 50.1619 |

Totals : 2.30259e4 1192.77765

Data File C:\CHEM32\1\DATA\RONG\NAOYUKI\_LC 2014-10-14 10-04-05\RZ-4-220-.D  
Sample Name: RZ-4-220

```
=====
Acq. Operator   : RZ                      Seq. Line :    1
Acq. Instrument : Instrument 1             Location  : Vial 17
Injection Date   : 10/14/2014 10:06:08 AM Inj       :    1
                                           Inj Volume: 1 µl
Different Inj Volume from Sequence !      Actual Inj Volume : 0.2 µl
Acq. Method     : C:\CHEM32\1\DATA\RONG\NAOYUKI_LC 2014-10-14 10-04-05\RZ-SHUTDOWN.M
```

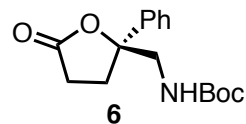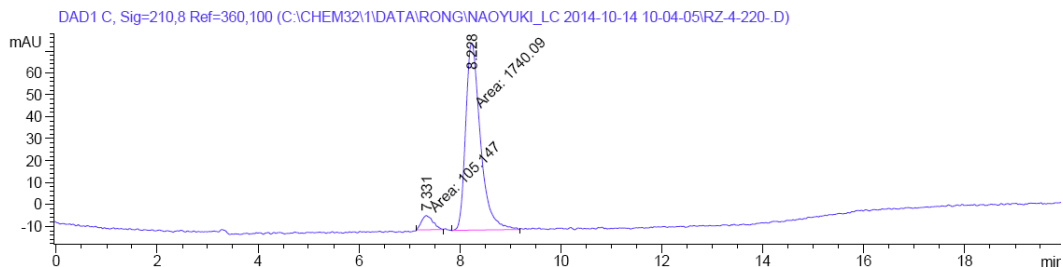

Signal 3: DAD1 C, Sig=210,8 Ref=360,100

| Peak # | RetTime [min] | Type | Width [min] | Area [mAU*s] | Height [mAU] | Area %  |
|--------|---------------|------|-------------|--------------|--------------|---------|
| 1      | 7.331         | MM   | 0.2658      | 105.14742    | 6.59191      | 5.6983  |
| 2      | 8.228         | MM   | 0.3391      | 1740.08972   | 85.52530     | 94.3017 |

Totals : 1845.23714 92.11721

RZ-4-184-H

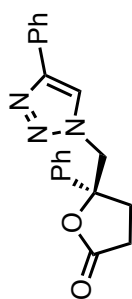

7

<sup>1</sup>H NMR

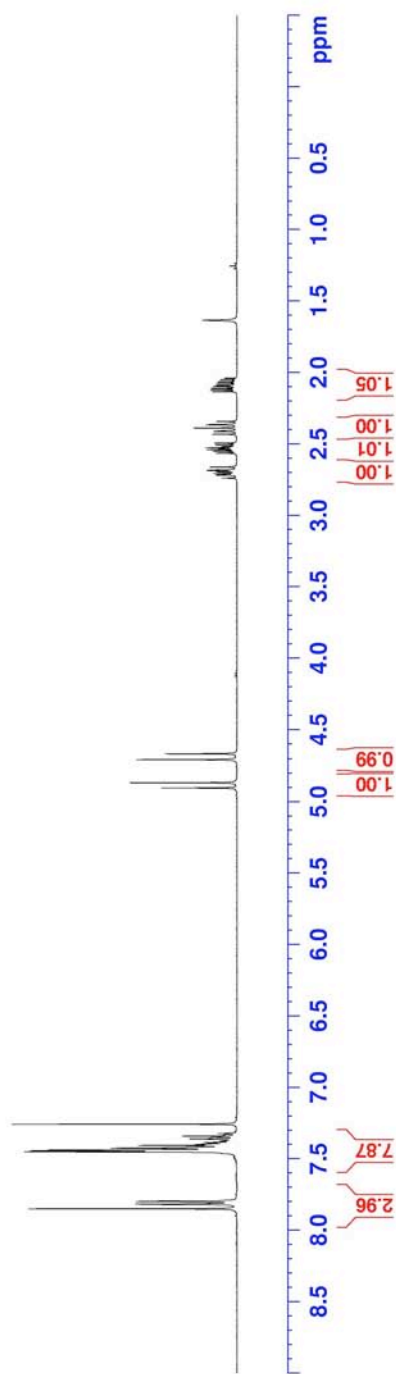

RZ-4-184-C

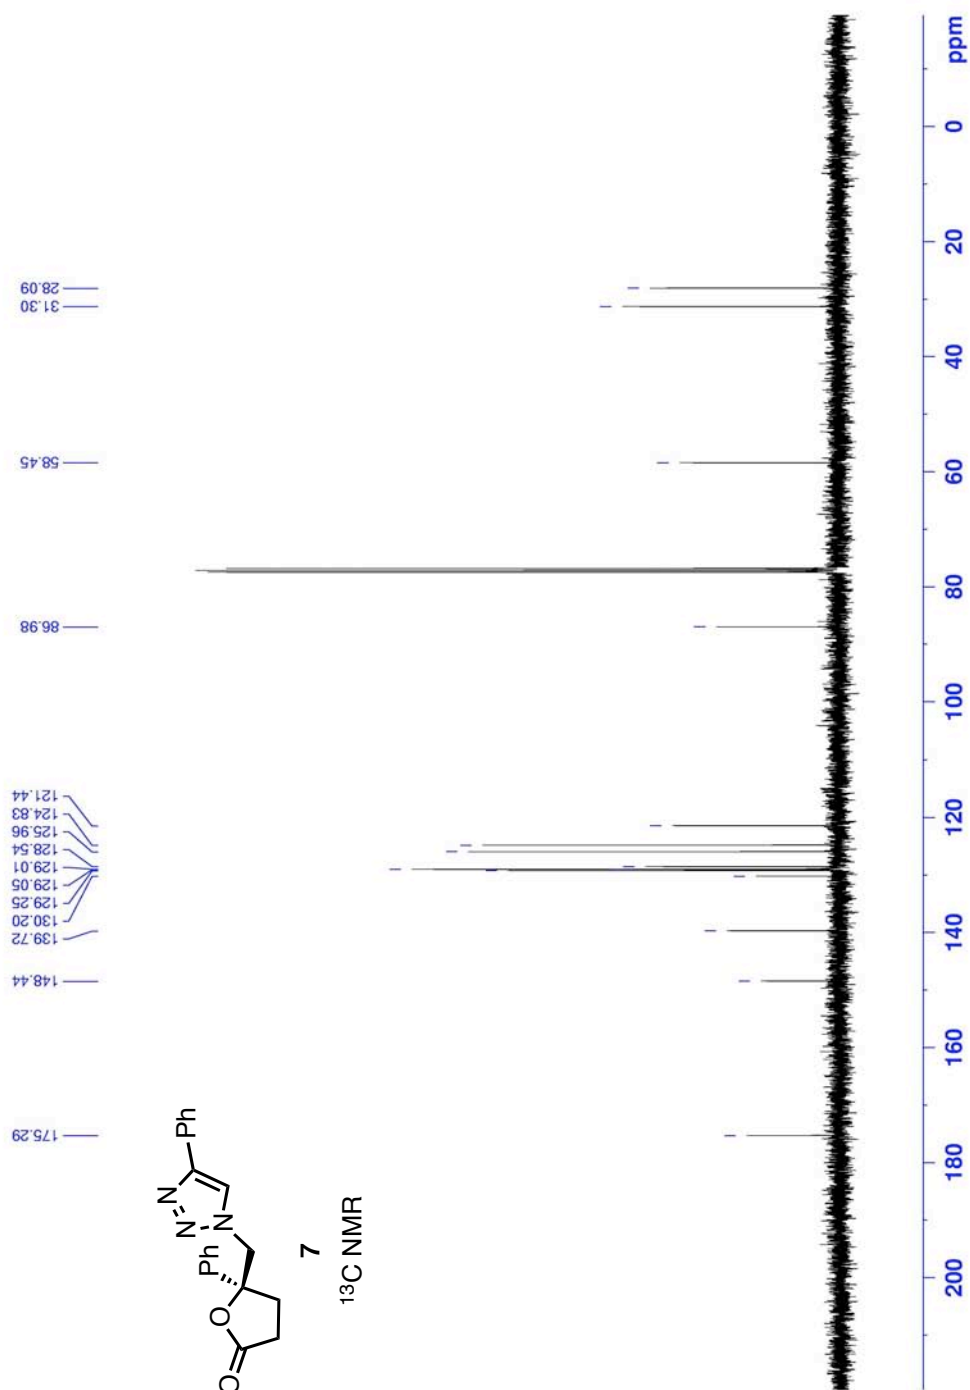

## HPLC traces for 7:

Sample Name: RZ-4-184-RAC

```
=====
Acq. Operator   : RZ                      Seq. Line :    1
Acq. Instrument : Instrument 1             Location  : Vial 19
Injection Date  : 8/7/2014 9:24:47 AM      Inj       :    1
                                           Inj Volume: 1 µl
Different Inj Volume from Sequence !      Actual Inj Volume: 5 µl
Acq. Method     : C:\CHEM32\1\DATA\RONG\NAOYUKI_LC 2014-08-07 09-22-20\RZ-15IPA-2014.M
```

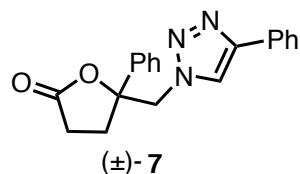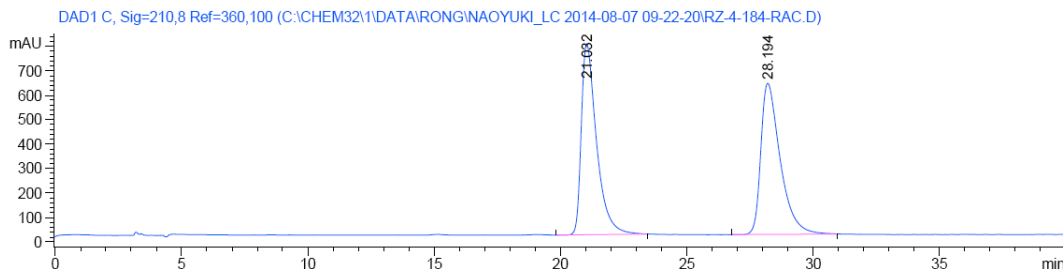

Signal 3: DAD1 C, Sig=210,8 Ref=360,100

| Peak # | RetTime [min] | Type | Width [min] | Area [mAU*s] | Height [mAU] | Area %  |
|--------|---------------|------|-------------|--------------|--------------|---------|
| 1      | 21.032        | VB   | 0.6184      | 3.28333e4    | 781.09888    | 49.6663 |
| 2      | 28.194        | VB   | 0.8013      | 3.32746e4    | 618.87622    | 50.3337 |

Totals : 6.61078e4 1399.97510

Sample Name: RZ-4-184

```
=====
Acq. Operator   : RZ                      Seq. Line :    2
Acq. Instrument : Instrument 1             Location  : Vial 16
Injection Date   : 8/19/2014 11:13:39 AM   Inj       :    1
                                           Inj Volume: 1 µl
Different Inj Volume from Sequence !      Actual Inj Volume: 2 µl
Acq. Method     : C:\CHEM32\1\DATA\RONG\NAOYUKI_LC 2014-08-19 10-30-20\RZ-15IPA-2014.M
```

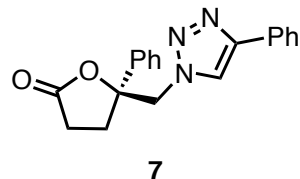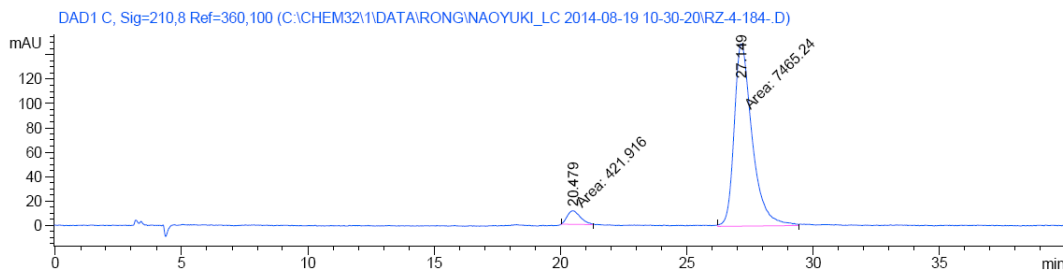

Signal 3: DAD1 C, Sig=210,8 Ref=360,100

| Peak # | RetTime [min] | Type | Width [min] | Area [mAU*s] | Height [mAU] | Area %  |
|--------|---------------|------|-------------|--------------|--------------|---------|
| 1      | 20.479        | MM   | 0.6195      | 421.91553    | 11.35162     | 5.3494  |
| 2      | 27.149        | MM   | 0.8317      | 7465.23828   | 149.60146    | 94.6506 |

Totals : 7887.15381 160.95307

RZ-4-197-H

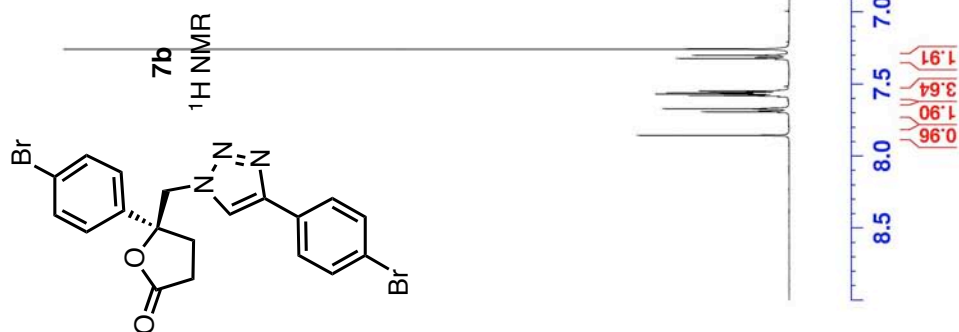



RZ-4-197-C

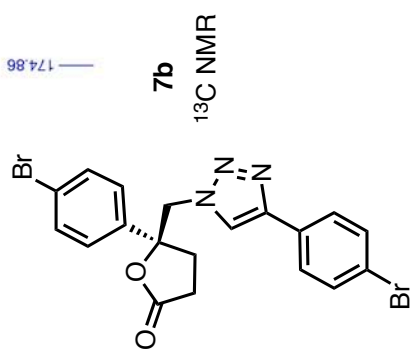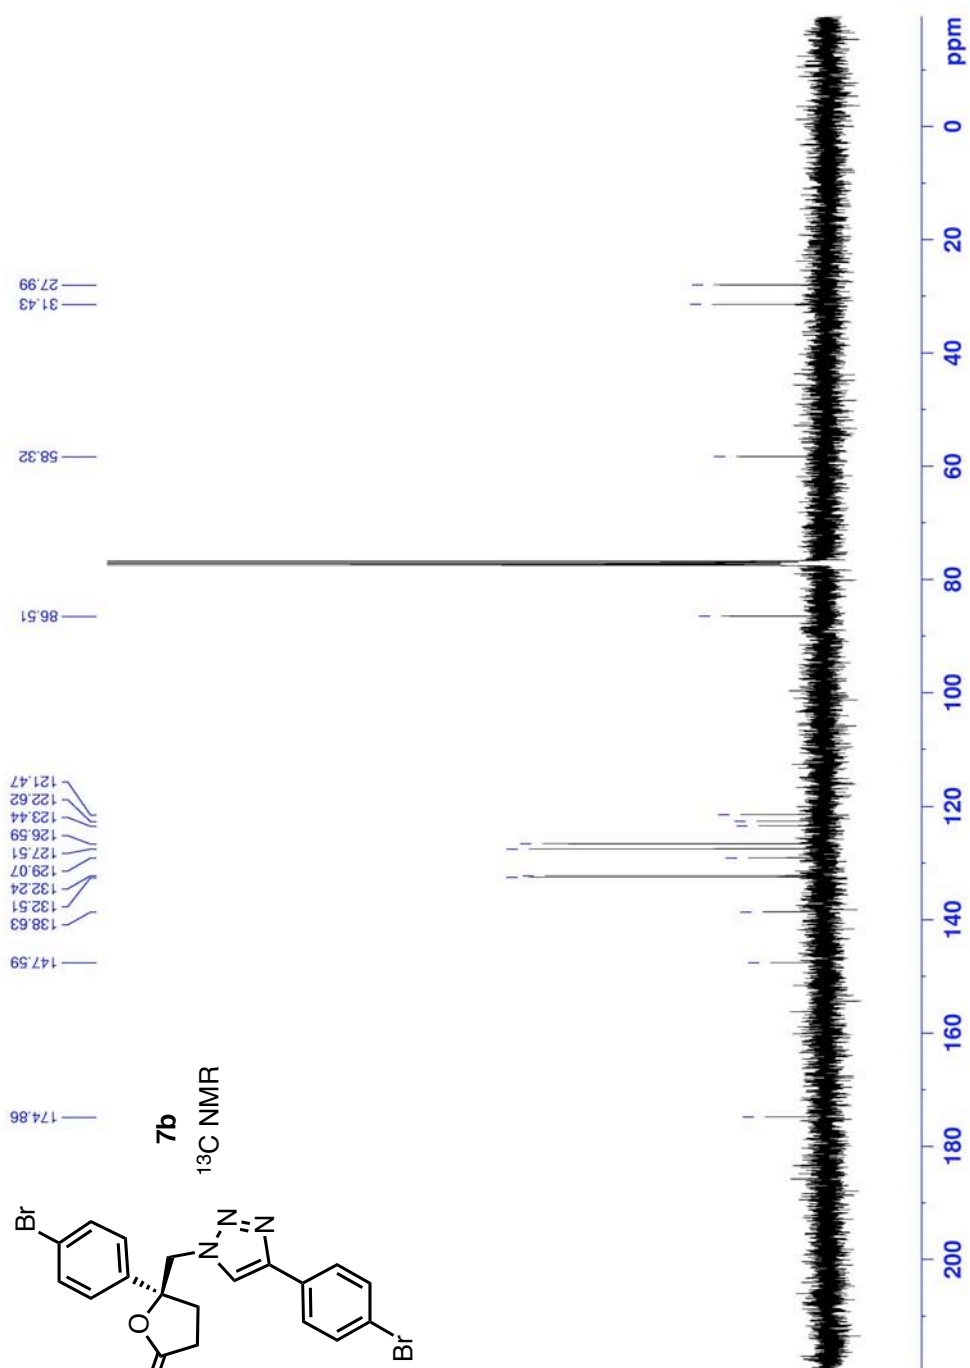

## HPLC traces for 7b:

Sample Name: RZ-4-197-RAC

```
=====
Acq. Operator   : RZ                      Seq. Line :    1
Acq. Instrument : Instrument 1             Location  : Vial 17
Injection Date  : 9/18/2014 8:27:14 AM     Inj       :    1
                                           Inj Volume: 1 µl
Different Inj Volume from Sequence !      Actual Inj Volume : 20 µl
Acq. Method     : C:\CHEM32\1\DATA\RONG\ZY 2014-09-18 08-24-42\RZ-20IPA-2014.M
```

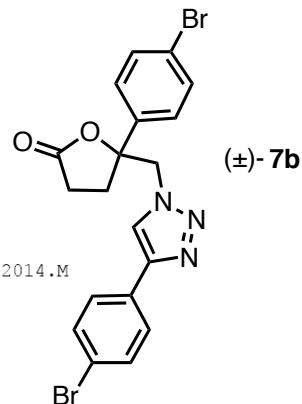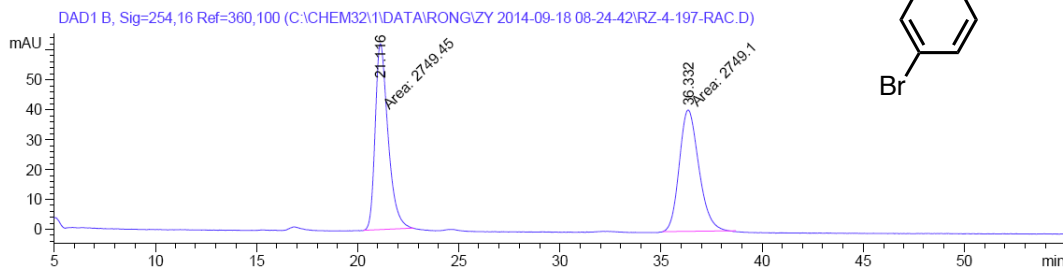

Signal 2: DAD1 B, Sig=254,16 Ref=360,100

| Peak # | RetTime [min] | Type | Width [min] | Area [mAU*s] | Height [mAU] | Area %  |
|--------|---------------|------|-------------|--------------|--------------|---------|
| 1      | 21.116        | MM   | 0.7375      | 2749.44751   | 62.13118     | 50.0031 |
| 2      | 36.332        | MM   | 1.1271      | 2749.10229   | 40.65299     | 49.9969 |

Totals : 5498.54980 102.78416

Sample Name: RZ-4-197

```
=====
Acq. Operator   : RZ                      Seq. Line :    2
Acq. Instrument : Instrument 1             Location  : Vial 16
Injection Date   : 9/17/2014 5:41:02 PM    Inj       :    1
                                           Inj Volume: 1 µl
Different Inj Volume from Sequence !      Actual Inj Volume : 8 µl
Acq. Method     : C:\CHEM32\1\DATA\RONG\ZY 2014-09-17 16-47-04\RZ-20IPA-2014.M
```

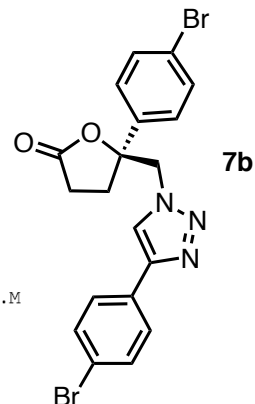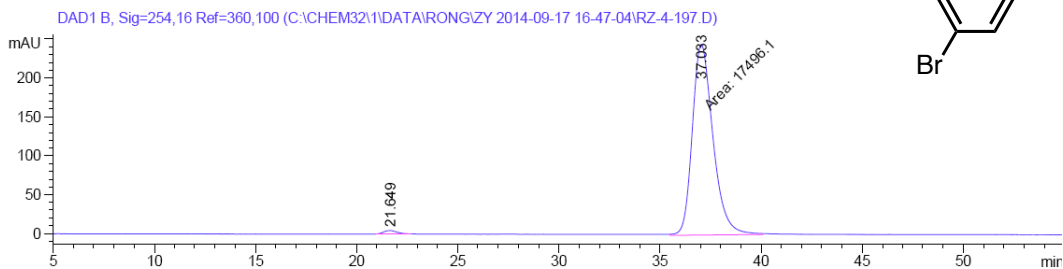

Signal 2: DAD1 B, Sig=254,16 Ref=360,100

| Peak # | RetTime [min] | Type | Width [min] | Area [mAU*s] | Height [mAU] | Area %  |
|--------|---------------|------|-------------|--------------|--------------|---------|
| 1      | 21.649        | BB   | 0.5420      | 202.84988    | 4.48220      | 1.1461  |
| 2      | 37.033        | MM   | 1.1893      | 17496.1e4    | 245.18356    | 98.8539 |

Totals : 1.76989e4 249.66576

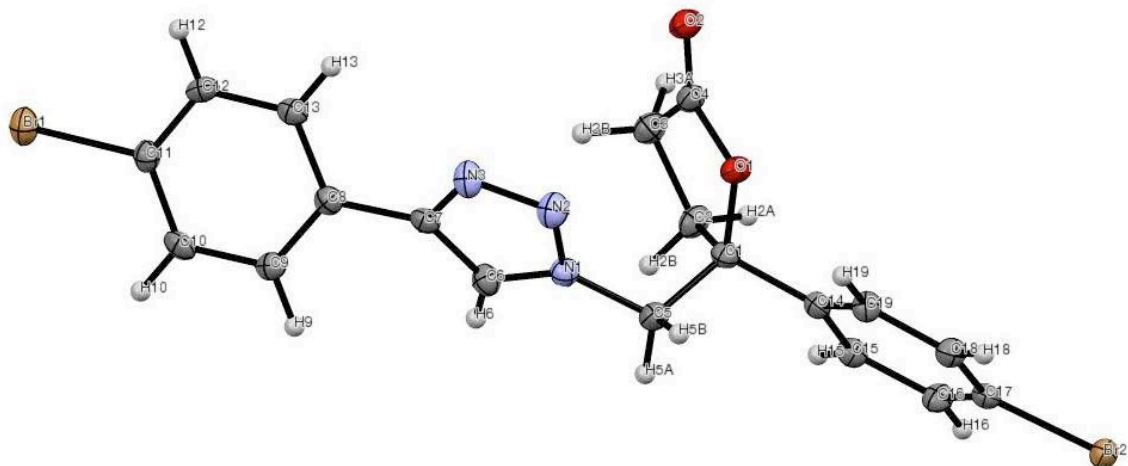

**SI-Table 1. Crystal data and structure refinement for compound 7b.**

|                                   |                                                                               |                       |
|-----------------------------------|-------------------------------------------------------------------------------|-----------------------|
| Identification code               | X14147                                                                        |                       |
| Empirical formula                 | C <sub>19</sub> H <sub>15</sub> Br <sub>2</sub> N <sub>3</sub> O <sub>2</sub> |                       |
| Formula weight                    | 477.16                                                                        |                       |
| Temperature                       | 100(2) K                                                                      |                       |
| Wavelength                        | 0.71073 Å                                                                     |                       |
| Crystal system                    | Orthorhombic                                                                  |                       |
| Space group                       | P 21 21 21                                                                    |                       |
| Unit cell dimensions              | a = 7.1816(11) Å                                                              | $\alpha = 90^\circ$ . |
|                                   | b = 11.0851(15) Å                                                             | $\beta = 90^\circ$ .  |
|                                   | c = 21.848(3) Å                                                               | $\gamma = 90^\circ$ . |
| Volume                            | 1739.3(4) Å <sup>3</sup>                                                      |                       |
| Z                                 | 4                                                                             |                       |
| Density (calculated)              | 1.822 Mg/m <sup>3</sup>                                                       |                       |
| Absorption coefficient            | 4.681 mm <sup>-1</sup>                                                        |                       |
| F(000)                            | 944                                                                           |                       |
| Crystal size                      | 0.110 x 0.065 x 0.015 mm <sup>3</sup>                                         |                       |
| Theta range for data collection   | 1.864 to 30.032°.                                                             |                       |
| Index ranges                      | -10 ≤ h ≤ 10, -13 ≤ k ≤ 14, -30 ≤ l ≤ 30                                      |                       |
| Reflections collected             | 37176                                                                         |                       |
| Independent reflections           | 4912 [R(int) = 0.0502]                                                        |                       |
| Completeness to theta = 25.242°   | 98.3 %                                                                        |                       |
| Absorption correction             | Semi-empirical from equivalents                                               |                       |
| Max. and min. transmission        | 0.5645 and 0.4825                                                             |                       |
| Refinement method                 | Full-matrix least-squares on F <sup>2</sup>                                   |                       |
| Data / restraints / parameters    | 4912 / 387 / 235                                                              |                       |
| Goodness-of-fit on F <sup>2</sup> | 1.028                                                                         |                       |
| Final R indices [I > 2σ(I)]       | R1 = 0.0326, wR2 = 0.0653                                                     |                       |
| R indices (all data)              | R1 = 0.0428, wR2 = 0.0683                                                     |                       |
| Absolute structure parameter      | -0.004(4)                                                                     |                       |
| Extinction coefficient            | n/a                                                                           |                       |
| Largest diff. peak and hole       | 0.709 and -0.727 e.Å <sup>-3</sup>                                            |                       |

**SI-Table 2. Atomic coordinates ( $\times 10^4$ ) and equivalent isotropic displacement parameters ( $\text{\AA}^2 \times 10^3$ ) for compound 7b.** U(eq) is defined as one third of the trace of the orthogonalized  $U^{ij}$  tensor.

|       | x       | y       | z        | U(eq) |
|-------|---------|---------|----------|-------|
| Br(1) | 6633(1) | 3221(1) | 6294(1)  | 25(1) |
| Br(2) | 3532(1) | 3581(1) | -1120(1) | 21(1) |
| O(1)  | 3070(4) | 5450(3) | 1809(1)  | 19(1) |
| O(2)  | 1516(5) | 6548(3) | 2496(1)  | 26(1) |
| N(1)  | 5840(5) | 4282(3) | 2562(2)  | 19(1) |
| N(2)  | 6068(5) | 5455(4) | 2731(2)  | 23(1) |
| N(3)  | 6239(5) | 5470(3) | 3326(2)  | 21(1) |
| C(1)  | 3546(6) | 4187(4) | 1698(2)  | 18(1) |
| C(2)  | 2072(6) | 3470(4) | 2061(2)  | 22(1) |
| C(3)  | 1444(7) | 4348(4) | 2556(2)  | 22(1) |
| C(4)  | 1948(6) | 5565(4) | 2307(2)  | 19(1) |
| C(5)  | 5561(6) | 3982(4) | 1919(2)  | 19(1) |
| C(6)  | 5890(6) | 3557(4) | 3056(2)  | 20(1) |
| C(7)  | 6148(5) | 4324(4) | 3542(2)  | 17(1) |
| C(8)  | 6304(6) | 4042(4) | 4198(2)  | 18(1) |
| C(9)  | 7070(5) | 2967(4) | 4406(2)  | 19(1) |
| C(10) | 7208(6) | 2726(4) | 5029(2)  | 20(1) |
| C(11) | 6522(6) | 3566(4) | 5446(2)  | 19(1) |
| C(12) | 5762(6) | 4647(4) | 5251(2)  | 20(1) |
| C(13) | 5660(6) | 4886(4) | 4629(2)  | 19(1) |
| C(14) | 3539(6) | 4001(4) | 1009(2)  | 17(1) |
| C(15) | 2885(6) | 2952(4) | 744(2)   | 19(1) |
| C(16) | 2884(6) | 2812(4) | 105(2)   | 19(1) |
| C(17) | 3586(6) | 3731(4) | -255(2)  | 16(1) |
| C(18) | 4325(6) | 4768(4) | 0(2)     | 19(1) |
| C(19) | 4289(6) | 4905(4) | 633(2)   | 18(1) |

**SI-Table 3. Bond lengths [Å] and angles [°] for compound 7b.**

|             |          |            |          |
|-------------|----------|------------|----------|
| Br(1)-C(11) | 1.895(4) | C(2)-C(3)  | 1.524(6) |
| Br(2)-C(17) | 1.898(4) | C(2)-H(2A) | 0.9900   |
| O(1)-C(4)   | 1.360(5) | C(2)-H(2B) | 0.9900   |
| O(1)-C(1)   | 1.461(5) | C(3)-C(4)  | 1.498(6) |
| O(2)-C(4)   | 1.206(5) | C(3)-H(3A) | 0.9900   |
| N(1)-C(6)   | 1.346(6) | C(3)-H(3B) | 0.9900   |
| N(1)-N(2)   | 1.361(5) | C(5)-H(5A) | 0.9900   |
| N(1)-C(5)   | 1.457(5) | C(5)-H(5B) | 0.9900   |
| N(2)-N(3)   | 1.306(5) | C(6)-C(7)  | 1.372(6) |
| N(3)-C(7)   | 1.357(6) | C(6)-H(6)  | 0.9500   |
| C(1)-C(14)  | 1.518(6) | C(7)-C(8)  | 1.471(6) |
| C(1)-C(5)   | 1.543(6) | C(8)-C(9)  | 1.389(6) |
| C(1)-C(2)   | 1.543(6) | C(8)-C(13) | 1.406(6) |

|                  |          |                   |          |
|------------------|----------|-------------------|----------|
| C(9)-C(10)       | 1.390(6) | N(1)-C(5)-H(5A)   | 108.9    |
| C(9)-H(9)        | 0.9500   | C(1)-C(5)-H(5A)   | 108.9    |
| C(10)-C(11)      | 1.394(6) | N(1)-C(5)-H(5B)   | 108.9    |
| C(10)-H(10)      | 0.9500   | C(1)-C(5)-H(5B)   | 108.9    |
| C(11)-C(12)      | 1.383(6) | H(5A)-C(5)-H(5B)  | 107.7    |
| C(12)-C(13)      | 1.387(6) | N(1)-C(6)-C(7)    | 104.7(4) |
| C(12)-H(12)      | 0.9500   | N(1)-C(6)-H(6)    | 127.7    |
| C(13)-H(13)      | 0.9500   | C(7)-C(6)-H(6)    | 127.7    |
| C(14)-C(15)      | 1.382(6) | N(3)-C(7)-C(6)    | 108.6(4) |
| C(14)-C(19)      | 1.404(6) | N(3)-C(7)-C(8)    | 122.3(4) |
| C(15)-C(16)      | 1.404(6) | C(6)-C(7)-C(8)    | 129.2(4) |
| C(15)-H(15)      | 0.9500   | C(9)-C(8)-C(13)   | 118.8(4) |
| C(16)-C(17)      | 1.381(6) | C(9)-C(8)-C(7)    | 122.1(4) |
| C(16)-H(16)      | 0.9500   | C(13)-C(8)-C(7)   | 119.1(4) |
| C(17)-C(18)      | 1.383(6) | C(8)-C(9)-C(10)   | 120.9(4) |
| C(18)-C(19)      | 1.391(6) | C(8)-C(9)-H(9)    | 119.5    |
| C(18)-H(18)      | 0.9500   | C(10)-C(9)-H(9)   | 119.5    |
| C(19)-H(19)      | 0.9500   | C(9)-C(10)-C(11)  | 119.1(4) |
|                  |          | C(9)-C(10)-H(10)  | 120.4    |
| C(4)-O(1)-C(1)   | 111.2(3) | C(11)-C(10)-H(10) | 120.4    |
| C(6)-N(1)-N(2)   | 110.5(4) | C(12)-C(11)-C(10) | 121.1(4) |
| C(6)-N(1)-C(5)   | 129.8(4) | C(12)-C(11)-Br(1) | 119.6(3) |
| N(2)-N(1)-C(5)   | 119.7(4) | C(10)-C(11)-Br(1) | 119.3(3) |
| N(3)-N(2)-N(1)   | 107.0(4) | C(11)-C(12)-C(13) | 119.3(4) |
| N(2)-N(3)-C(7)   | 109.2(4) | C(11)-C(12)-H(12) | 120.4    |
| O(1)-C(1)-C(14)  | 107.1(3) | C(13)-C(12)-H(12) | 120.4    |
| O(1)-C(1)-C(5)   | 108.0(3) | C(12)-C(13)-C(8)  | 120.8(4) |
| C(14)-C(1)-C(5)  | 107.1(4) | C(12)-C(13)-H(13) | 119.6    |
| O(1)-C(1)-C(2)   | 104.3(3) | C(8)-C(13)-H(13)  | 119.6    |
| C(14)-C(1)-C(2)  | 115.9(4) | C(15)-C(14)-C(19) | 119.0(4) |
| C(5)-C(1)-C(2)   | 114.0(3) | C(15)-C(14)-C(1)  | 122.1(4) |
| C(3)-C(2)-C(1)   | 103.8(4) | C(19)-C(14)-C(1)  | 118.9(4) |
| C(3)-C(2)-H(2A)  | 111.0    | C(14)-C(15)-C(16) | 120.7(4) |
| C(1)-C(2)-H(2A)  | 111.0    | C(14)-C(15)-H(15) | 119.6    |
| C(3)-C(2)-H(2B)  | 111.0    | C(16)-C(15)-H(15) | 119.6    |
| C(1)-C(2)-H(2B)  | 111.0    | C(17)-C(16)-C(15) | 118.9(4) |
| H(2A)-C(2)-H(2B) | 109.0    | C(17)-C(16)-H(16) | 120.5    |
| C(4)-C(3)-C(2)   | 104.2(3) | C(15)-C(16)-H(16) | 120.5    |
| C(4)-C(3)-H(3A)  | 110.9    | C(16)-C(17)-C(18) | 121.6(4) |
| C(2)-C(3)-H(3A)  | 110.9    | C(16)-C(17)-Br(2) | 119.6(3) |
| C(4)-C(3)-H(3B)  | 110.9    | C(18)-C(17)-Br(2) | 118.8(3) |
| C(2)-C(3)-H(3B)  | 110.9    | C(17)-C(18)-C(19) | 118.9(4) |
| H(3A)-C(3)-H(3B) | 108.9    | C(17)-C(18)-H(18) | 120.5    |
| O(2)-C(4)-O(1)   | 120.7(4) | C(19)-C(18)-H(18) | 120.5    |
| O(2)-C(4)-C(3)   | 128.8(4) | C(18)-C(19)-C(14) | 120.8(4) |
| O(1)-C(4)-C(3)   | 110.5(4) | C(18)-C(19)-H(19) | 119.6    |
| N(1)-C(5)-C(1)   | 113.4(3) | C(14)-C(19)-H(19) | 119.6    |

**SI-Table 4. Anisotropic displacement parameters ( $\text{\AA}^2 \times 10^3$ ) for compound 7b.** The anisotropic displacement factor exponent takes the form:  $-2p^2 [h^2 a^{*2} U^{11} + \dots + 2 h k a^* b^* U^{12}]$

|       | $U^{11}$ | $U^{22}$ | $U^{33}$ | $U^{23}$ | $U^{13}$ | $U^{12}$ |
|-------|----------|----------|----------|----------|----------|----------|
| Br(1) | 27(1)    | 30(1)    | 19(1)    | 4(1)     | -2(1)    | -3(1)    |
| Br(2) | 22(1)    | 26(1)    | 16(1)    | -1(1)    | -1(1)    | 3(1)     |
| O(1)  | 20(2)    | 17(2)    | 18(1)    | -2(1)    | 4(1)     | 0(1)     |
| O(2)  | 31(2)    | 24(2)    | 22(1)    | -2(1)    | 5(1)     | 4(2)     |
| N(1)  | 18(2)    | 19(2)    | 19(2)    | 0(1)     | -1(1)    | 0(1)     |
| N(2)  | 23(2)    | 23(2)    | 24(2)    | -2(2)    | -3(1)    | -5(1)    |
| N(3)  | 22(2)    | 21(2)    | 21(2)    | 3(1)     | -4(1)    | -6(1)    |
| C(1)  | 21(2)    | 15(2)    | 19(2)    | 0(1)     | 1(2)     | 2(2)     |
| C(2)  | 25(2)    | 22(2)    | 18(2)    | 1(2)     | 4(2)     | -4(2)    |
| C(3)  | 22(2)    | 24(2)    | 21(2)    | -1(2)    | 4(2)     | -3(2)    |
| C(4)  | 18(2)    | 24(2)    | 16(2)    | -1(2)    | 1(2)     | 1(2)     |
| C(5)  | 20(2)    | 22(2)    | 17(2)    | -1(2)    | 1(2)     | 2(2)     |
| C(6)  | 19(2)    | 20(2)    | 21(2)    | 0(2)     | -2(2)    | -1(2)    |
| C(7)  | 12(2)    | 17(2)    | 21(2)    | 0(1)     | -1(1)    | 1(1)     |
| C(8)  | 13(2)    | 21(2)    | 19(2)    | -2(1)    | -1(2)    | -2(2)    |
| C(9)  | 15(2)    | 19(2)    | 22(2)    | -5(2)    | -1(1)    | -1(1)    |
| C(10) | 13(2)    | 20(2)    | 27(2)    | 1(2)     | -4(2)    | 1(2)     |
| C(11) | 17(2)    | 22(2)    | 17(2)    | 2(2)     | -1(2)    | -2(2)    |
| C(12) | 17(2)    | 20(2)    | 21(2)    | -4(2)    | 4(2)     | 1(2)     |
| C(13) | 16(2)    | 19(2)    | 22(2)    | 0(2)     | -1(2)    | 2(2)     |
| C(14) | 16(2)    | 16(2)    | 18(2)    | 0(1)     | -1(2)    | 2(2)     |
| C(15) | 18(2)    | 17(2)    | 21(2)    | 1(2)     | 1(2)     | -1(2)    |
| C(16) | 22(2)    | 15(2)    | 21(2)    | -2(2)    | 0(2)     | -2(2)    |
| C(17) | 14(2)    | 15(2)    | 19(2)    | 0(1)     | 1(2)     | 2(2)     |
| C(18) | 18(2)    | 18(2)    | 20(2)    | 1(2)     | 2(2)     | -1(2)    |
| C(19) | 19(2)    | 16(2)    | 19(2)    | 0(2)     | -1(2)    | -3(2)    |

**SI-Table 5. Hydrogen coordinates (  $\times 10^4$  ) and isotropic displacement parameters ( $\text{\AA}^2 \times 10^3$  ) for compound 7b.**

|       | x    | y    | z    | U(eq) |
|-------|------|------|------|-------|
| H(2A) | 1016 | 3236 | 1795 | 26    |
| H(2B) | 2621 | 2734 | 2243 | 26    |
| H(3A) | 85   | 4286 | 2626 | 27    |
| H(3B) | 2101 | 4190 | 2946 | 27    |
| H(5A) | 5895 | 3125 | 1855 | 23    |
| H(5B) | 6413 | 4479 | 1668 | 23    |
| H(6)  | 5772 | 2704 | 3066 | 24    |
| H(9)  | 7506 | 2389 | 4119 | 23    |
| H(10) | 7763 | 1998 | 5168 | 24    |
| H(12) | 5316 | 5218 | 5540 | 23    |
| H(13) | 5148 | 5629 | 4492 | 23    |
| H(15) | 2432 | 2319 | 996  | 22    |
| H(16) | 2407 | 2098 | -77  | 23    |
| H(18) | 4848 | 5376 | -253 | 23    |
| H(19) | 4779 | 5618 | 812  | 21    |

RZ-4-234-H

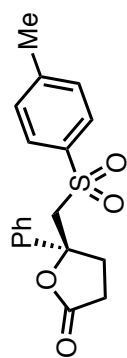

**8a**

$^1\text{H}$  NMR

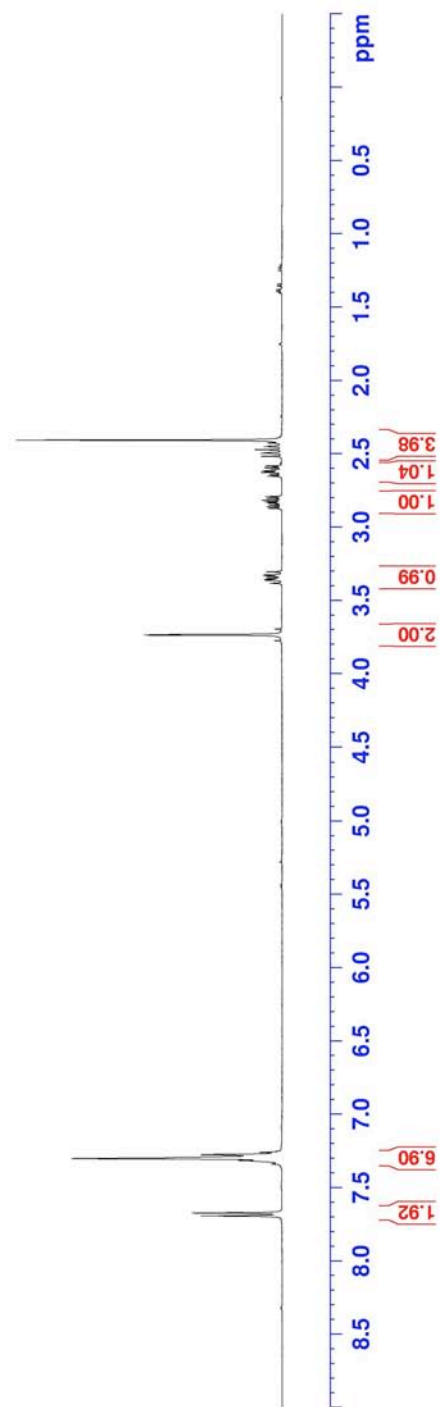



RZ-4-234-C

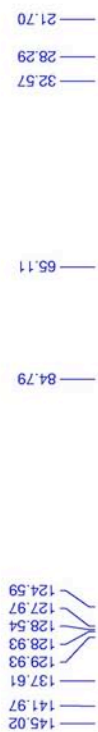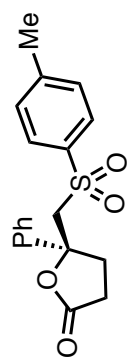

8a

<sup>13</sup>C NMR

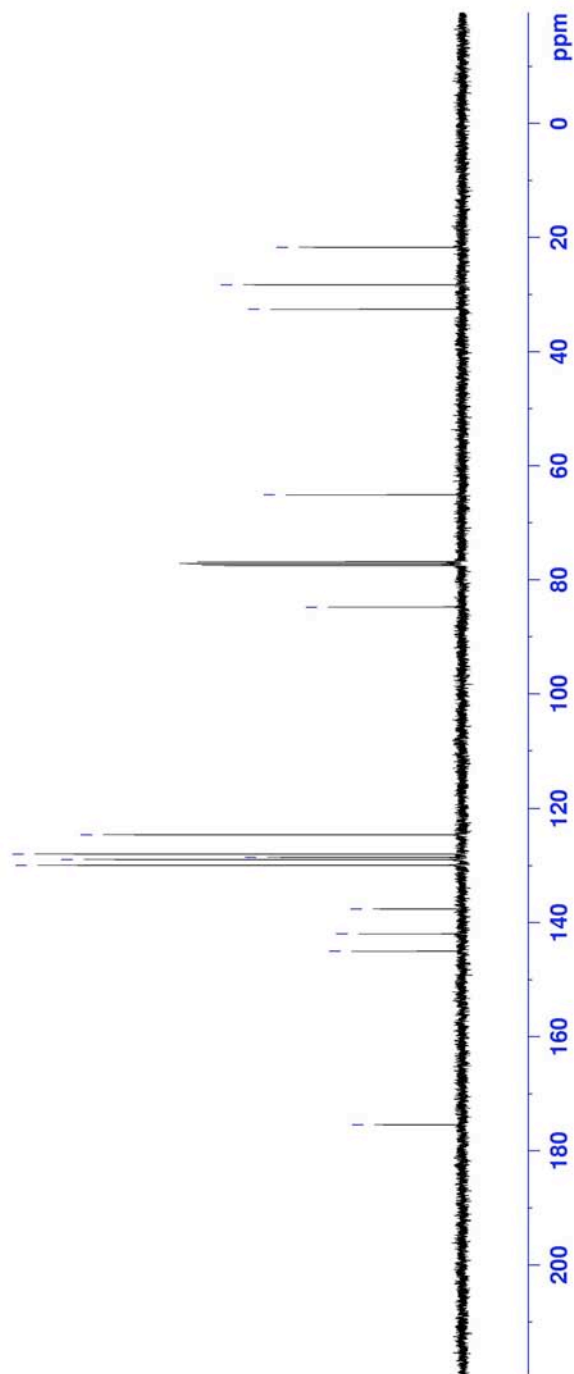

## HPLC traces for 8a:

Data File C:\CHEM32\1\DATA\MTP1\NAOYUKI\_LC 2014-12-05 10-43-13\RZ-4-234-RAC-.D  
Sample Name: RZ-4-234-RAC

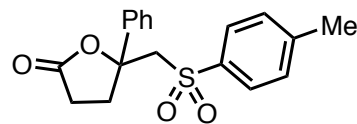

**racemic**

```
=====
Acq. Operator   : SANDRA                      Seq. Line :    3
Acq. Instrument : Instrument 1                 Location  : Vial 17
Injection Date  : 12/5/2014 12:12:25 PM       Inj       :    1
                                                Inj Volume: 1 µl
Different Inj Volume from Sequence !         Actual Inj Volume : 8 µl
Acq. Method     : C:\CHEM32\1\DATA\MTP1\NAOYUKI_LC 2014-12-05 10-43-13\RZ-SHUTDOWN.M
=====
```

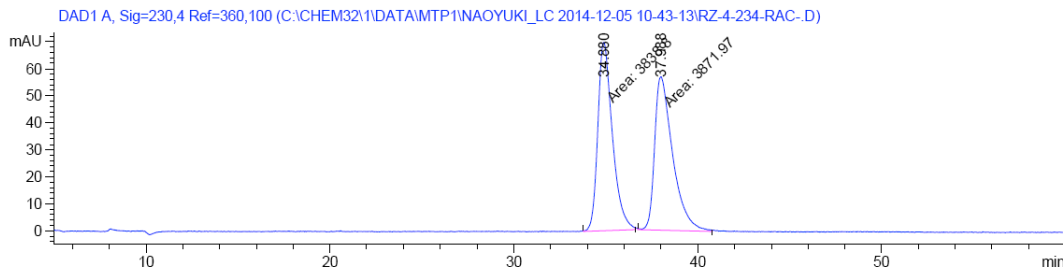

Signal 1: DAD1 A, Sig=230,4 Ref=360,100

| Peak # | RetTime [min] | Type | Width [min] | Area [mAU*s] | Height [mAU] | Area %  |
|--------|---------------|------|-------------|--------------|--------------|---------|
| 1      | 34.880        | MM   | 0.9182      | 3838.79614   | 69.67712     | 49.7849 |
| 2      | 37.988        | MM   | 1.1363      | 3871.97144   | 56.78994     | 50.2151 |

Totals : 7710.76758 126.46707

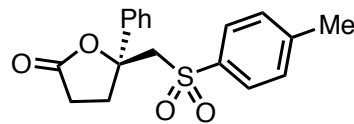

**8a**

Data File C:\CHEM32\1\DATA\RONG\NAOYUKI\_LC 2014-12-13 14-59-43\RZ-4-234.D  
Sample Name: RZ-4-234

```
=====
Acq. Operator   : RZ                          Seq. Line :    1
Acq. Instrument : Instrument 1                 Location  : Vial 16
Injection Date  : 12/13/2014 3:02:05 PM       Inj       :    1
                                                Inj Volume: 1 µl
Different Inj Volume from Sequence !         Actual Inj Volume : 4 µl
Acq. Method     : C:\CHEM32\1\DATA\RONG\NAOYUKI_LC 2014-12-13 14-59-43\RZ-SHUTDOWN.M
=====
```

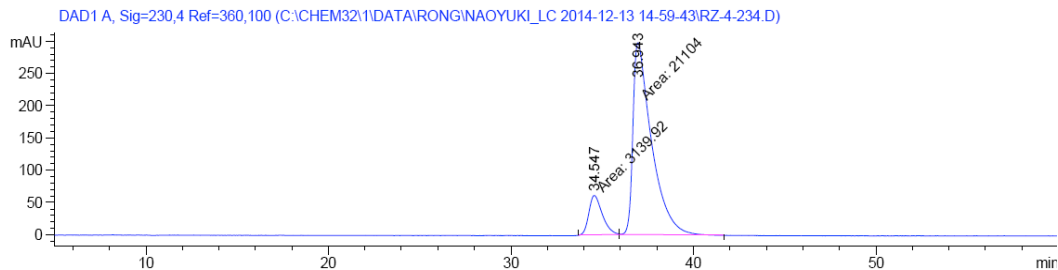

Signal 1: DAD1 A, Sig=230,4 Ref=360,100

| Peak # | RetTime [min] | Type | Width [min] | Area [mAU*s] | Height [mAU] | Area %  |
|--------|---------------|------|-------------|--------------|--------------|---------|
| 1      | 34.547        | MM   | 0.8546      | 3139.91797   | 61.23563     | 12.9514 |
| 2      | 36.943        | MM   | 1.1830      | 21104.0404   | 297.32425    | 87.0486 |

Totals : 2.42439e4 358.55988

RZ-4-240A-H

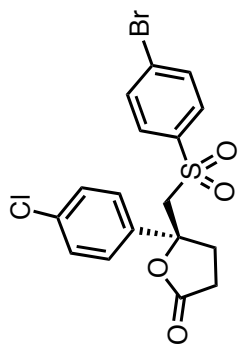

8b

$^1\text{H}$  NMR

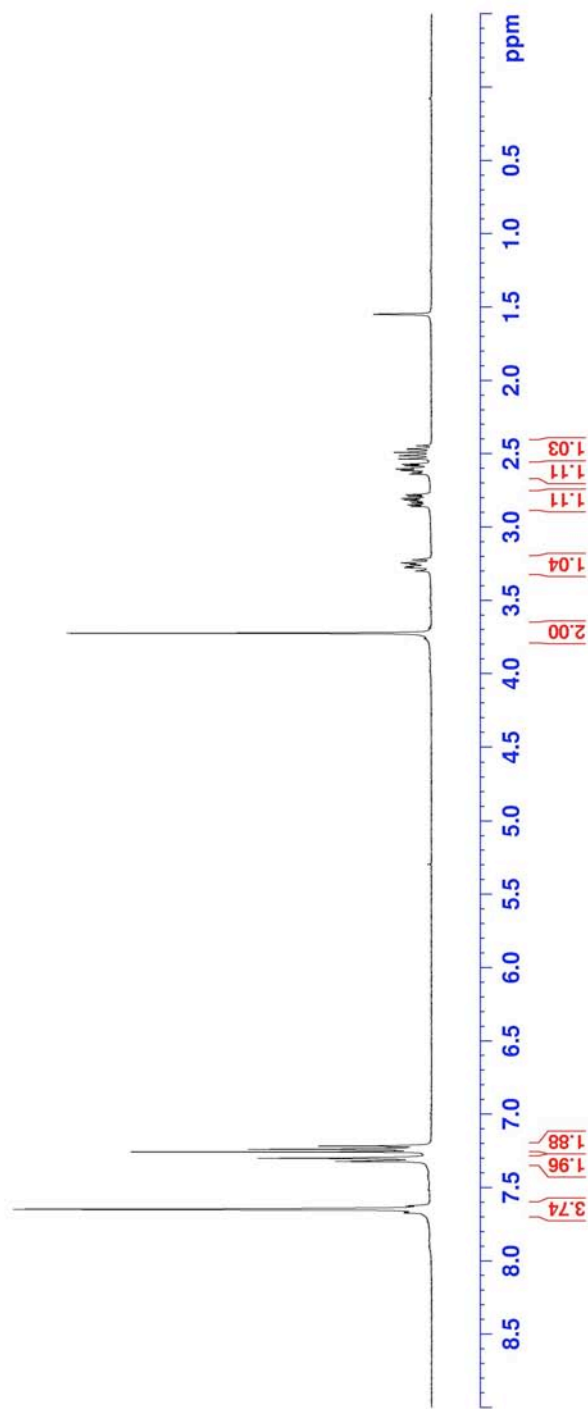

RZ-4-240A-C

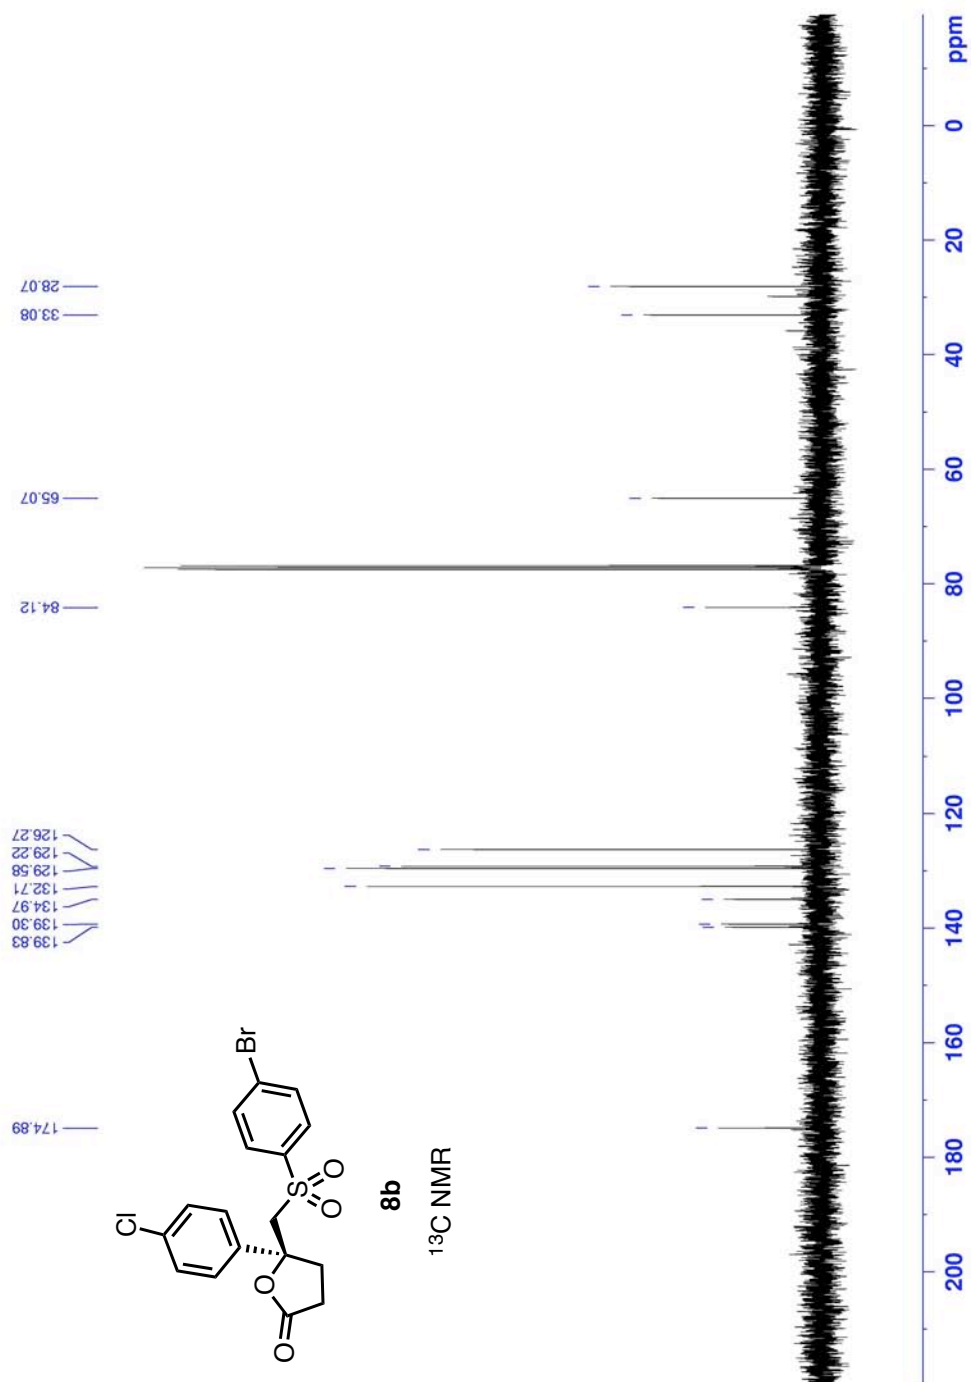

## HPLC traces for 8b:

Data File C:\CHEM32\1\DATA\RONG\NAOYUKI\_LC 2014-12-09 09-03-14\RZ-4-240A-RAC.D  
Sample Name: RZ-4-240A-RAC

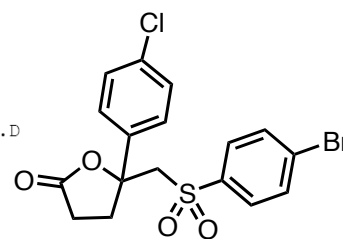

**racemic**

```
=====
Acq. Operator   : RZ                      Seq. Line :    6
Acq. Instrument : Instrument 1             Location  : Vial 20
Injection Date  : 12/9/2014 12:57:27 PM   Inj       :    1
                                           Inj Volume: 1 µl
Different Inj Volume from Sequence !      Actual Inj Volume : 12 µl
Acq. Method     : C:\CHEM32\1\DATA\RONG\NAOYUKI_LC 2014-12-09 09-03-14\RZ-15IPA-2014.M
```

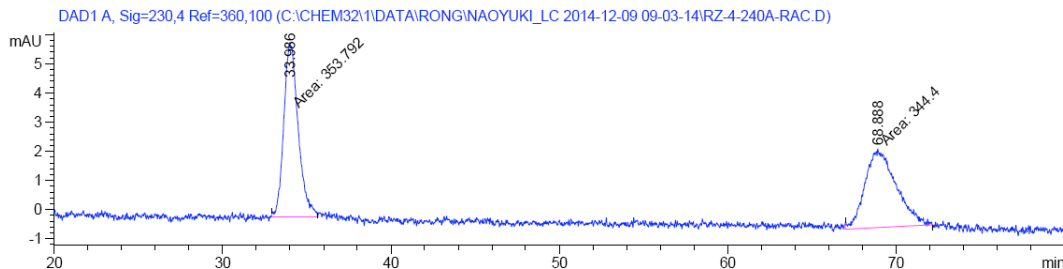

Signal 1: DAD1 A, Sig=230,4 Ref=360,100

| Peak # | RetTime [min] | Type | Width [min] | Area [mAU*s] | Height [mAU] | Area %  |
|--------|---------------|------|-------------|--------------|--------------|---------|
| 1      | 33.986        | MM   | 0.9849      | 353.79236    | 5.98674      | 50.6726 |
| 2      | 68.888        | MM   | 2.1221      | 344.40015    | 2.70483      | 49.3274 |

Totals : 698.19250 8.69158

Data File C:\CHEM32\1\DATA\RONG\NAOYUKI\_LC 2014-12-09 17-16-57\RZ-4-240A.D  
Sample Name: RZ-4-240A

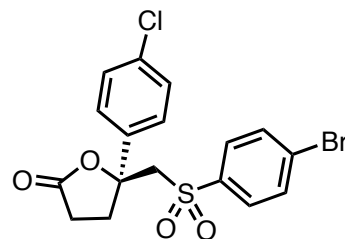

**8b**

```
=====
Acq. Operator   : RZ                      Seq. Line :    1
Acq. Instrument : Instrument 1             Location  : Vial 28
Injection Date  : 12/9/2014 5:19:13 PM   Inj       :    1
                                           Inj Volume: 1 µl
Different Inj Volume from Sequence !      Actual Inj Volume : 10 µl
Acq. Method     : C:\CHEM32\1\DATA\RONG\NAOYUKI_LC 2014-12-09 17-16-57\RZ-15IPA-2014.M
```

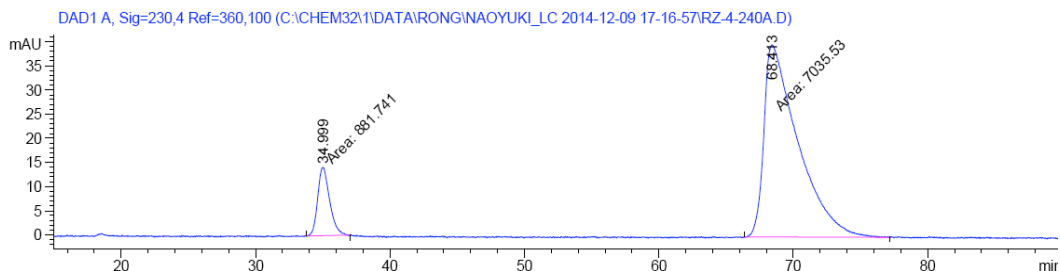

Signal 1: DAD1 A, Sig=230,4 Ref=360,100

| Peak # | RetTime [min] | Type | Width [min] | Area [mAU*s] | Height [mAU] | Area %  |
|--------|---------------|------|-------------|--------------|--------------|---------|
| 1      | 34.999        | MM   | 1.0348      | 881.74060    | 14.20121     | 11.1369 |
| 2      | 68.413        | MM   | 2.9414      | 7035.52930   | 39.86550     | 88.8631 |

Totals : 7917.26990 54.06671

RZ-4-240B-H

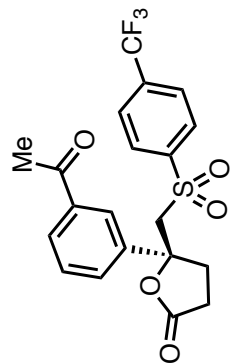

8c

<sup>1</sup>H NMR

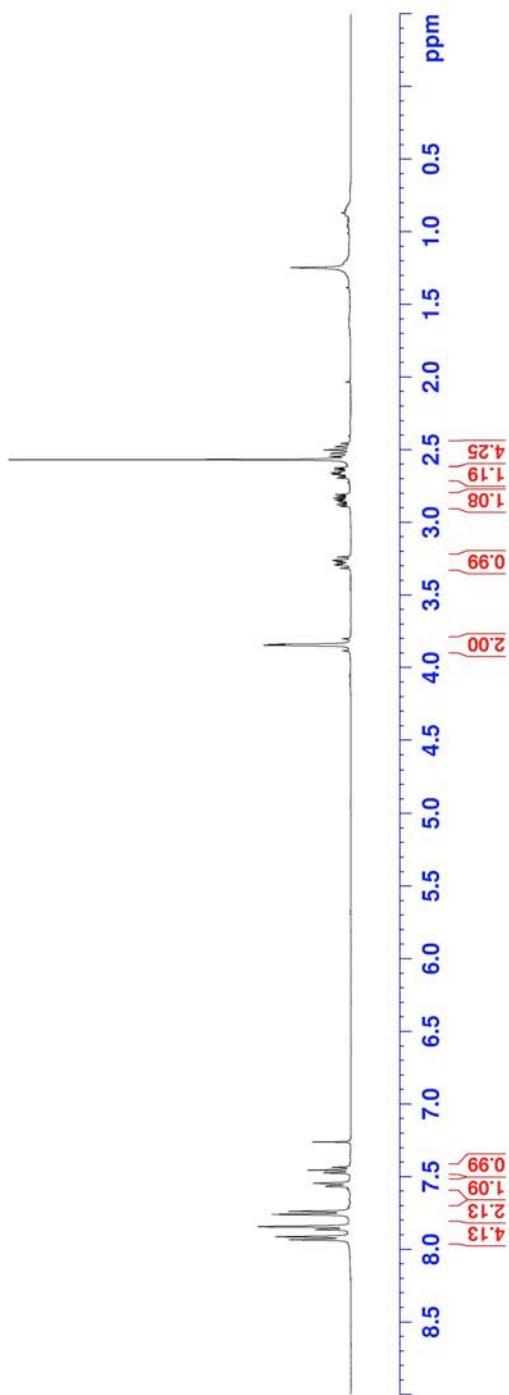

RZ-4-240B-C

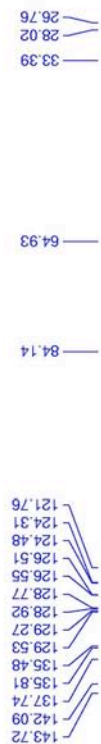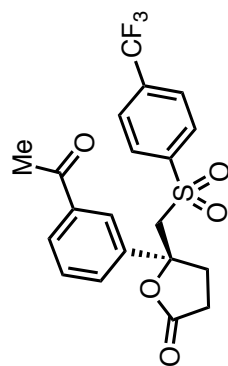

**8c**  
<sup>13</sup>C NMR

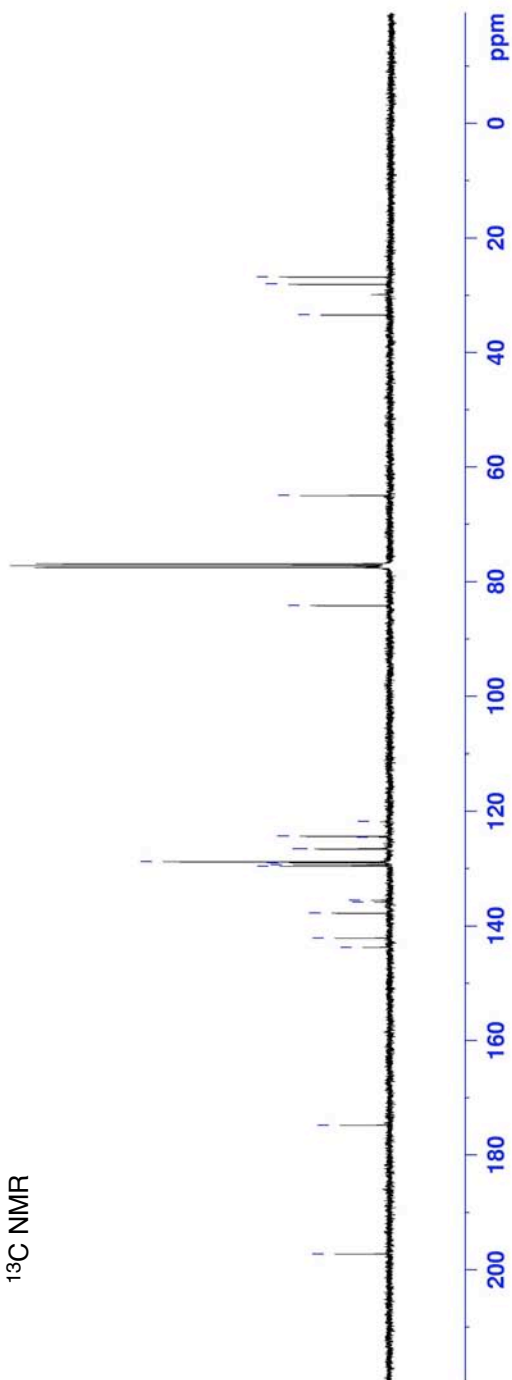

RZ-4-240B-F

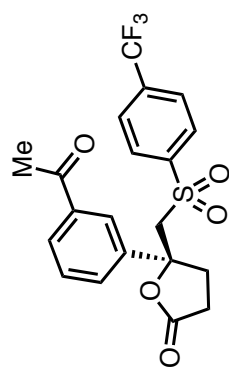

8c

$^{19}\text{F}$  NMR

-63.26

0 -20 -40 -60 -80 -100 -120 -140 -160 -180 -200 ppm



## HPLC traces for 8c:

Data File C:\CHEM32\1\DATA\RONG\NAOYUKI\_LC 2014-12-13 14-59-43\RZ-4-240B-RAC.D  
Sample Name: RZ-4-240B-RAC

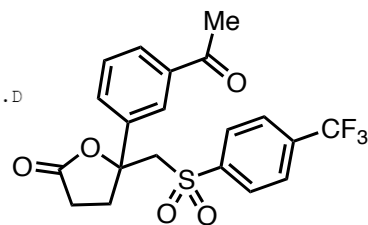

**racemic**

```
=====
Acq. Operator   : RZ                      Seq. Line :    5
Acq. Instrument : Instrument 1             Location  : Vial 19
Injection Date  : 12/13/2014 9:06:58 PM   Inj       :    1
                                           Inj Volume: 1 µl
Different Inj Volume from Sequence !      Actual Inj Volume : 8 µl
Acq. Method     : C:\CHEM32\1\DATA\RONG\NAOYUKI_LC 2014-12-13 14-59-43\RZ-SHUTDOWN.M
```

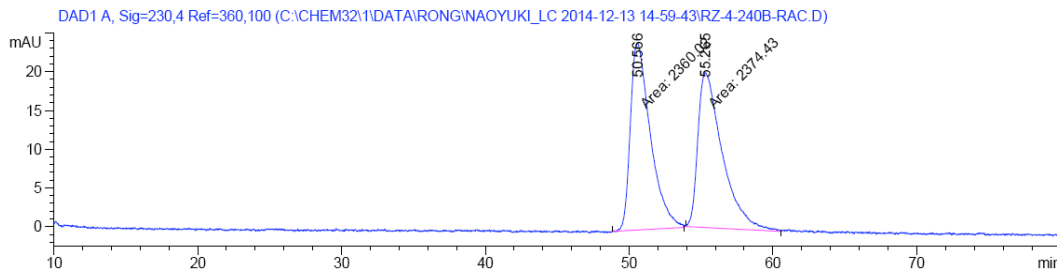

Signal 1: DAD1 A, Sig=230,4 Ref=360,100

| Peak # | RetTime [min] | Type | Width [min] | Area [mAU*s] | Height [mAU] | Area %  |
|--------|---------------|------|-------------|--------------|--------------|---------|
| 1      | 50.566        | MM   | 1.6244      | 2360.01953   | 24.21427     | 49.8479 |
| 2      | 55.265        | MM   | 1.9716      | 2374.42505   | 20.07225     | 50.1521 |

Totals : 4734.44458 44.28651

Data File C:\CHEM32\1\DATA\RONG\NAOYUKI\_LC 2014-12-13 14-59-43\RZ-4-240B.D  
Sample Name: RZ-4-240B

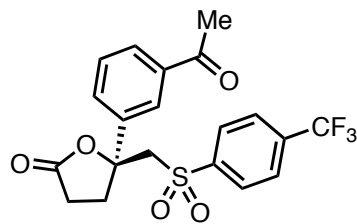

**8c**

```
=====
Acq. Operator   : RZ                      Seq. Line :    3
Acq. Instrument : Instrument 1             Location  : Vial 17
Injection Date  : 12/13/2014 6:04:25 PM   Inj       :    1
                                           Inj Volume: 1 µl
Different Inj Volume from Sequence !      Actual Inj Volume : 4 µl
Acq. Method     : C:\CHEM32\1\DATA\RONG\NAOYUKI_LC 2014-12-13 14-59-43\RZ-SHUTDOWN.M
```

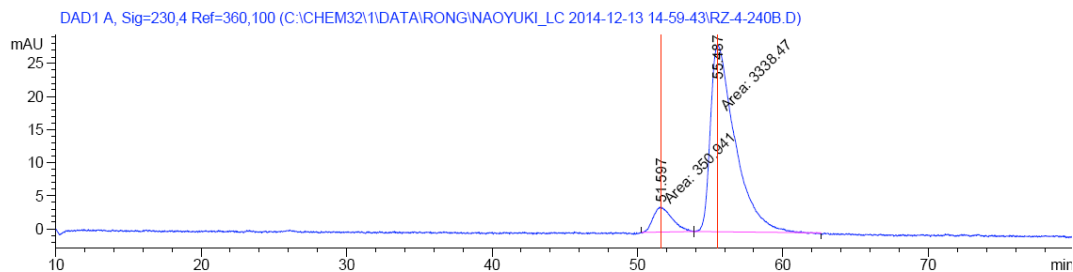

Signal 1: DAD1 A, Sig=230,4 Ref=360,100

| Peak # | RetTime [min] | Type | Width [min] | Area [mAU*s] | Height [mAU] | Area %  |
|--------|---------------|------|-------------|--------------|--------------|---------|
| 1      | 51.597        | MM   | 1.5154      | 350.94086    | 3.85978      | 9.5121  |
| 2      | 55.487        | MM   | 1.9667      | 3338.47388   | 28.29182     | 90.4879 |

Totals : 3689.41473 32.15160

RZ-4-242A-H

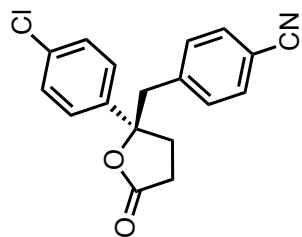

9a

$^1\text{H}$  NMR

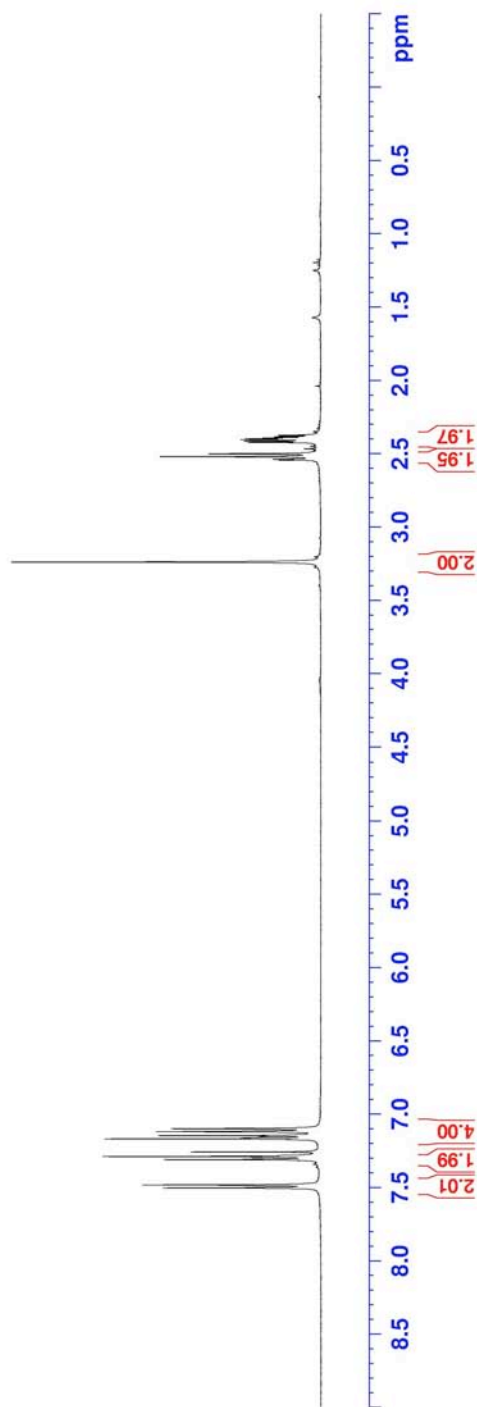

RZ-4-242A-C

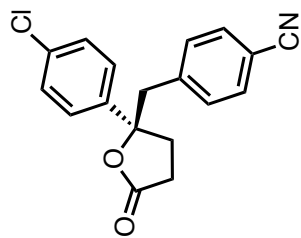

9a

<sup>13</sup>C NMR

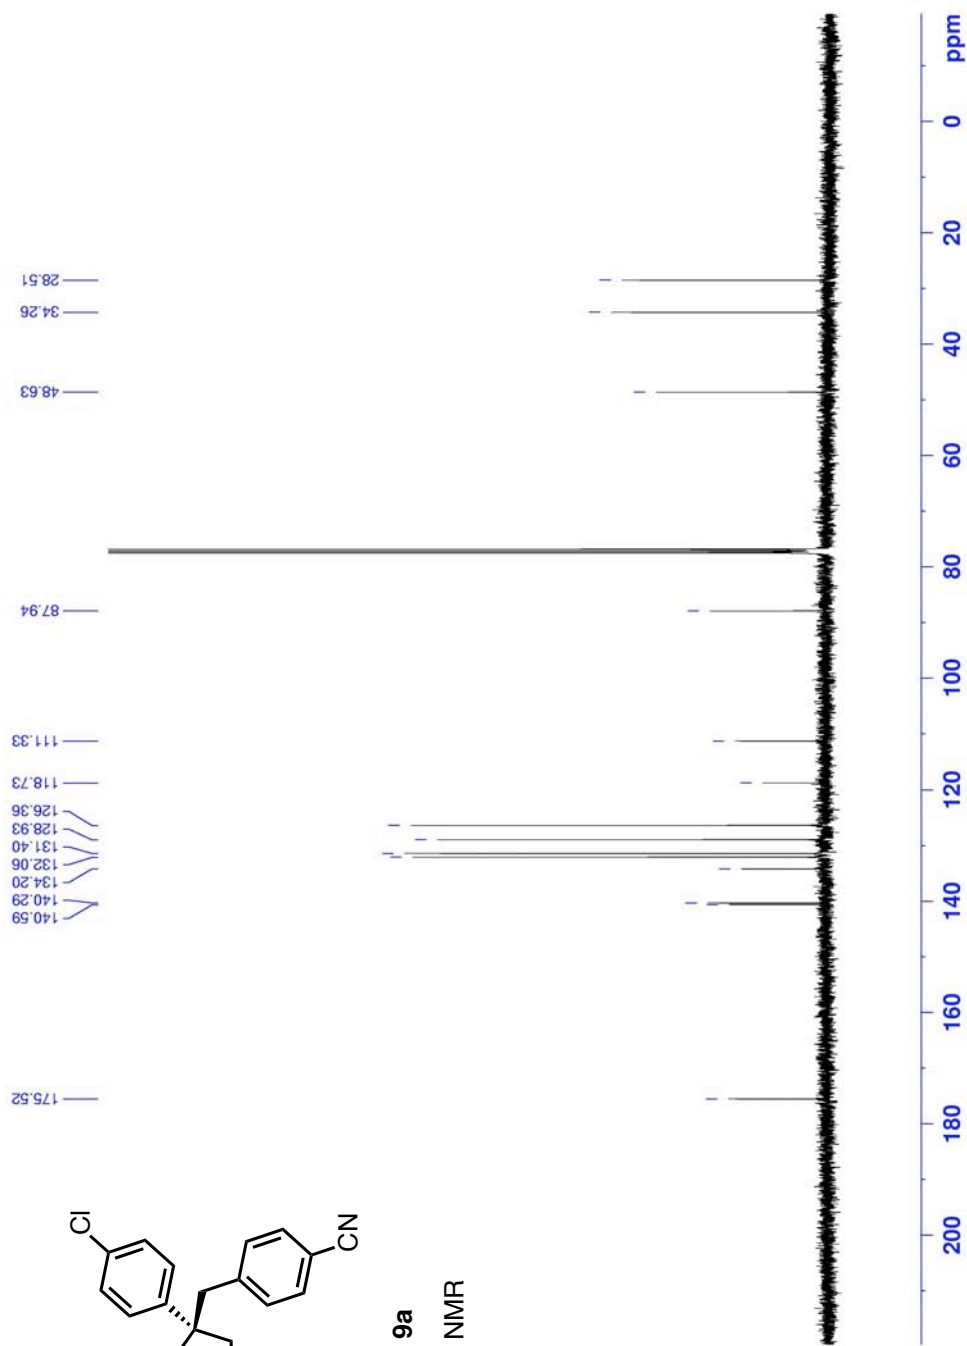

## HPLC traces for 9a:

Data File C:\CHEM32\1\DATA\RONG\NAOYUKI\_LC 2014-11-24 14-06-46\RZ-4-232B-RAC.D  
Sample Name: RZ-4-232B-RAC

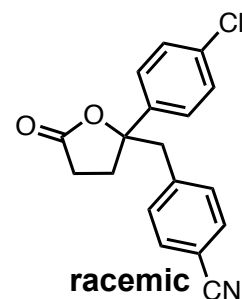

```
=====
Acq. Operator   : RZ                      Seq. Line :    7
Acq. Instrument : Instrument 1             Location  : Vial 27
Injection Date  : 11/24/2014 6:26:06 PM    Inj       :    1
                                           Inj Volume: 1 µl
Different Inj Volume from Sequence !      Actual Inj Volume : 8 µl
Acq. Method     : C:\CHEM32\1\DATA\RONG\NAOYUKI_LC 2014-11-24 14-06-46\RZ-SHUTDOWN.M
```

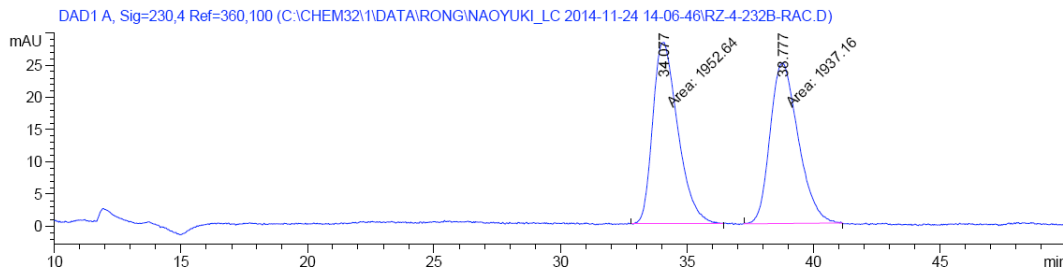

Signal 1: DAD1 A, Sig=230,4 Ref=360,100

| Peak # | RetTime [min] | Type | Width [min] | Area [mAU*s] | Height [mAU] | Area %  |
|--------|---------------|------|-------------|--------------|--------------|---------|
| 1      | 34.077        | MM   | 1.1550      | 1952.64087   | 28.17696     | 50.1990 |
| 2      | 38.777        | MM   | 1.2941      | 1937.16296   | 24.94906     | 49.8010 |

Totals : 3889.80383 53.12602

Data File C:\CHEM32\1\DATA\RONG\NAOYUKI\_LC 2014-12-10 12-18-53\RZ-4-242A.D  
Sample Name: RZ-4-242A

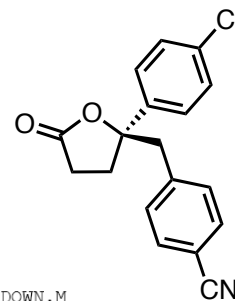

```
=====
Acq. Operator   : RZ                      Seq. Line :    1
Acq. Instrument : Instrument 1             Location  : Vial 18
Injection Date   : 12/10/2014 12:21:12 PM Inj       :    1
                                           Inj Volume: 1 µl
Different Inj Volume from Sequence !      Actual Inj Volume : 8 µl
Acq. Method     : C:\CHEM32\1\DATA\RONG\NAOYUKI_LC 2014-12-10 12-18-53\RZ-SHUTDOWN.M
```

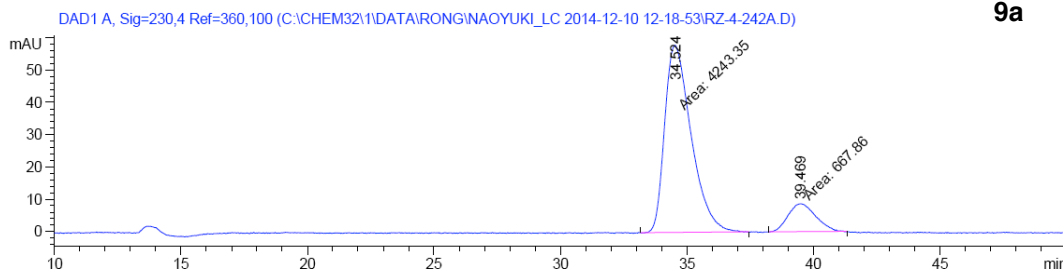

Signal 1: DAD1 A, Sig=230,4 Ref=360,100

| Peak # | RetTime [min] | Type | Width [min] | Area [mAU*s] | Height [mAU] | Area %  |
|--------|---------------|------|-------------|--------------|--------------|---------|
| 1      | 34.524        | MM   | 1.2181      | 4243.34570   | 58.05779     | 86.4013 |
| 2      | 39.469        | MM   | 1.2756      | 667.85956    | 8.72598      | 13.5987 |

Totals : 4911.20526 66.78376

RZ-4-242C-H

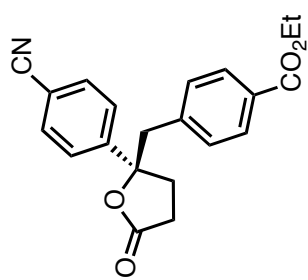

9b

$^1\text{H}$  NMR

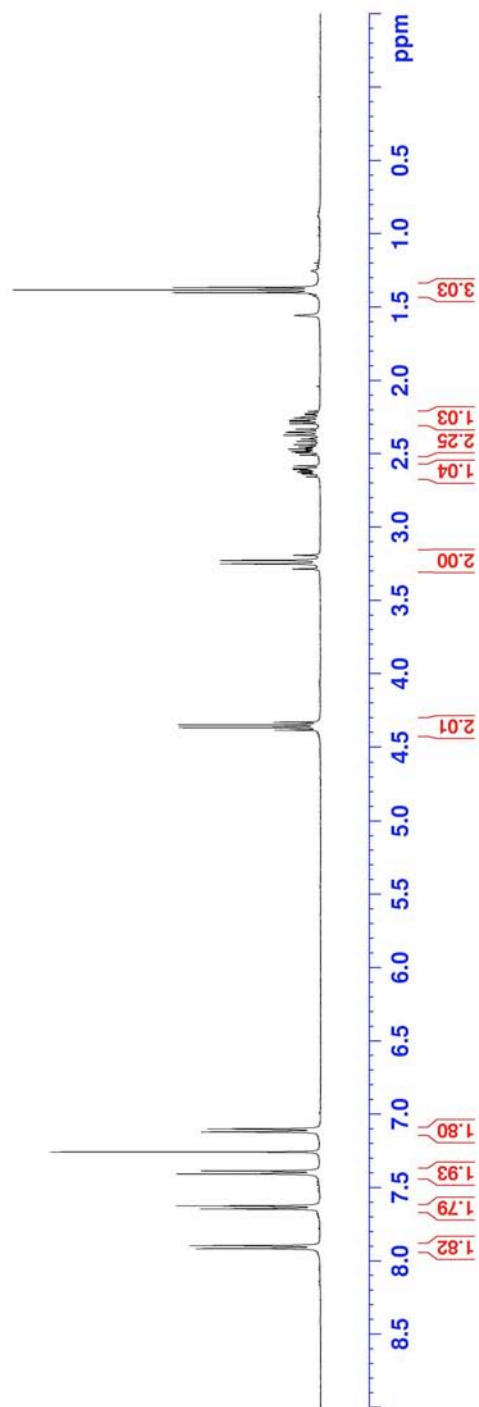

RZ-4-242C-C

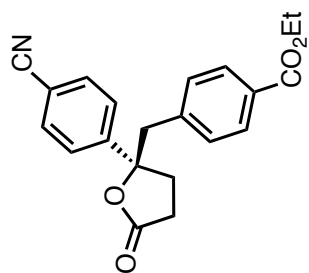

**9b**

$^{13}\text{C}$  NMR

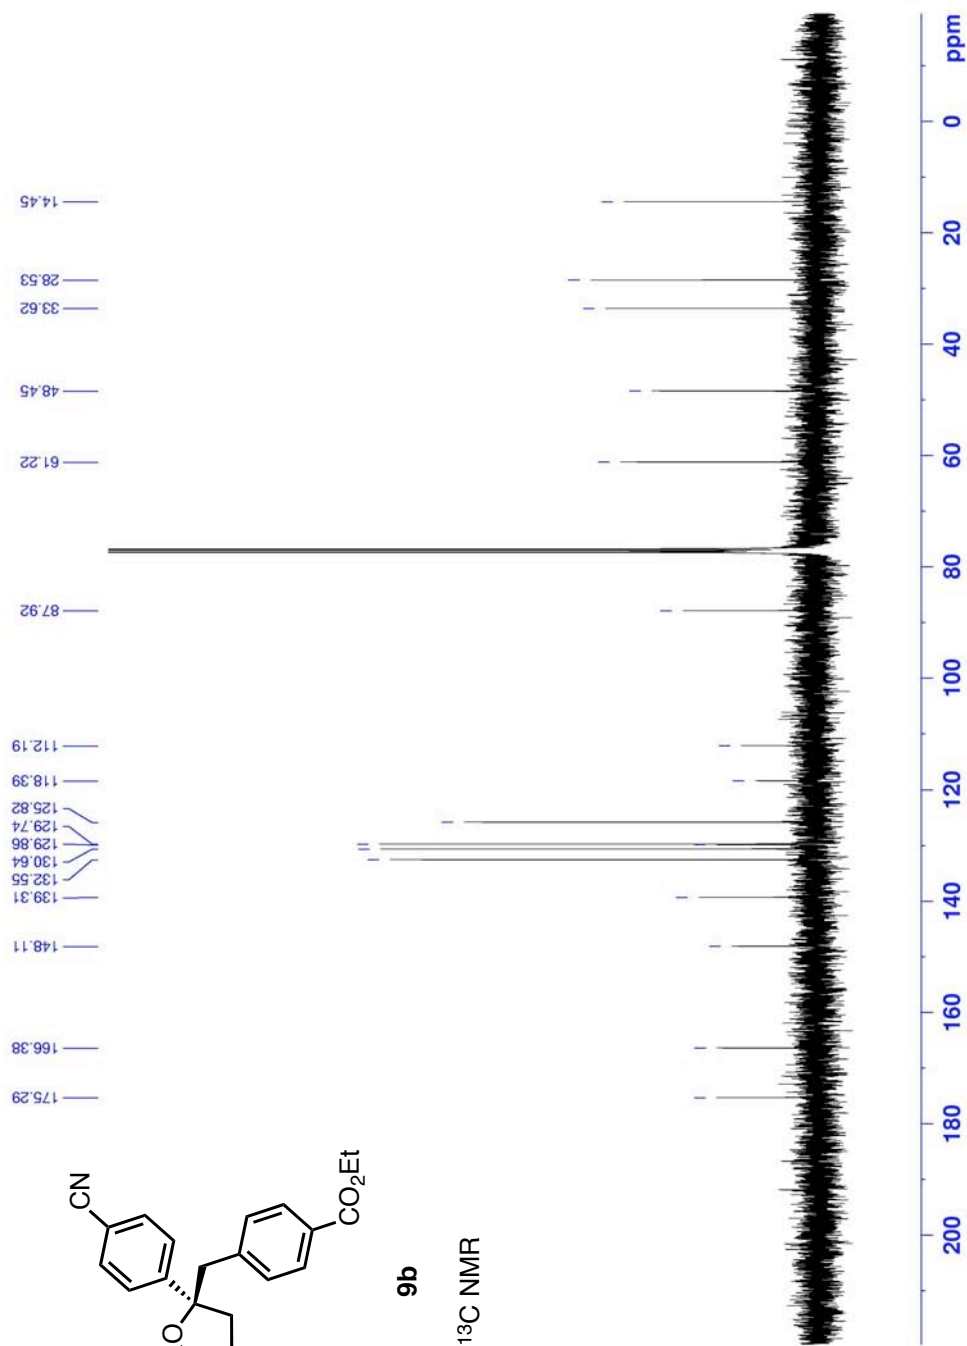

## HPLC traces for 9b:

Data File C:\CHEM32\1\DATA\RONG\NAOYUKI\_LC 2014-12-10 17-59-20\RZ-4-242C-RAC.D  
Sample Name: RZ-4-242C-RAC

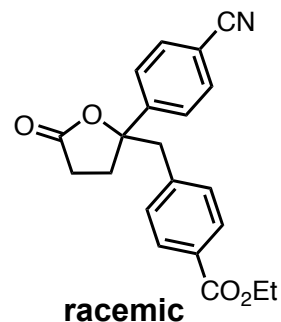

```
=====
Acq. Operator   : RZ                      Seq. Line :    2
Acq. Instrument : Instrument 1             Location  : Vial 19
Injection Date  : 12/10/2014 6:53:21 PM   Inj       :    1
                                           Inj Volume: 1 µl
Different Inj Volume from Sequence !      Actual Inj Volume : 20 µl
Acq. Method     : C:\CHEM32\1\DATA\RONG\NAOYUKI_LC 2014-12-10 17-59-20\RZ-15IPA-2014.M
=====
```

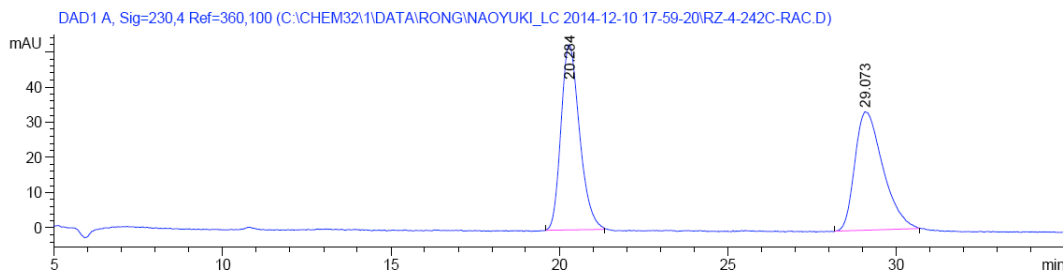

Signal 1: DAD1 A, Sig=230,4 Ref=360,100

| Peak # | RetTime [min] | Type | Width [min] | Area [mAU*s] | Height [mAU] | Area %  |
|--------|---------------|------|-------------|--------------|--------------|---------|
| 1      | 20.284        | BB   | 0.5581      | 2026.92505   | 52.77429     | 50.8526 |
| 2      | 29.073        | BB   | 0.6995      | 1958.96021   | 33.73444     | 49.1474 |

Totals : 3985.88525 86.50873

Data File C:\CHEM32\1\DATA\RONG\NAOYUKI\_LC 2014-12-10 17-59-20\RZ-4-242C.D  
Sample Name: RZ-4-242C

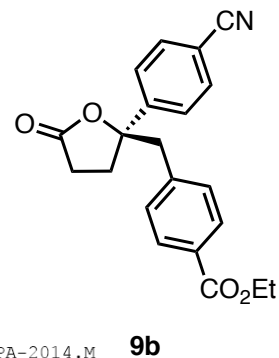

```
=====
Acq. Operator   : RZ                      Seq. Line :    1
Acq. Instrument : Instrument 1             Location  : Vial 17
Injection Date  : 12/10/2014 6:01:47 PM   Inj       :    1
                                           Inj Volume: 1 µl
Different Inj Volume from Sequence !      Actual Inj Volume : 10 µl
Acq. Method     : C:\CHEM32\1\DATA\RONG\NAOYUKI_LC 2014-12-10 17-59-20\RZ-15IPA-2014.M
=====
```

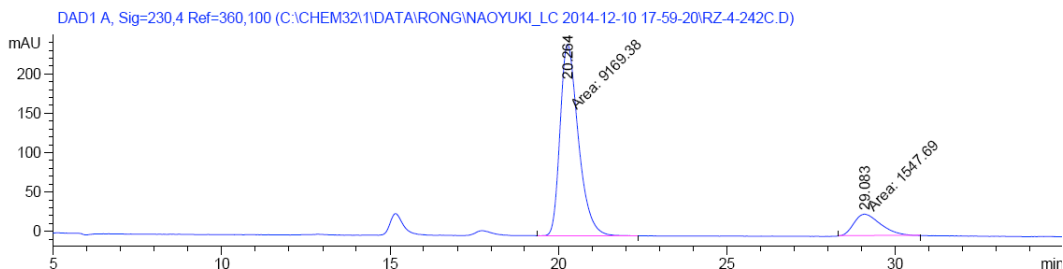

Signal 1: DAD1 A, Sig=230,4 Ref=360,100

| Peak # | RetTime [min] | Type | Width [min] | Area [mAU*s] | Height [mAU] | Area %  |
|--------|---------------|------|-------------|--------------|--------------|---------|
| 1      | 20.264        | MM   | 0.6281      | 9169.38184   | 243.29703    | 85.5586 |
| 2      | 29.083        | MM   | 0.9316      | 1547.69482   | 27.68975     | 14.4414 |

Totals : 1.07171e4 270.98678

RZ-4-242E-H

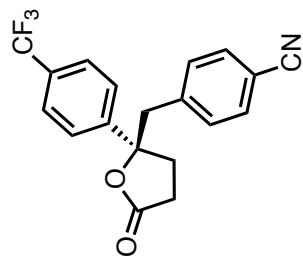

9c

$^1\text{H}$  NMR

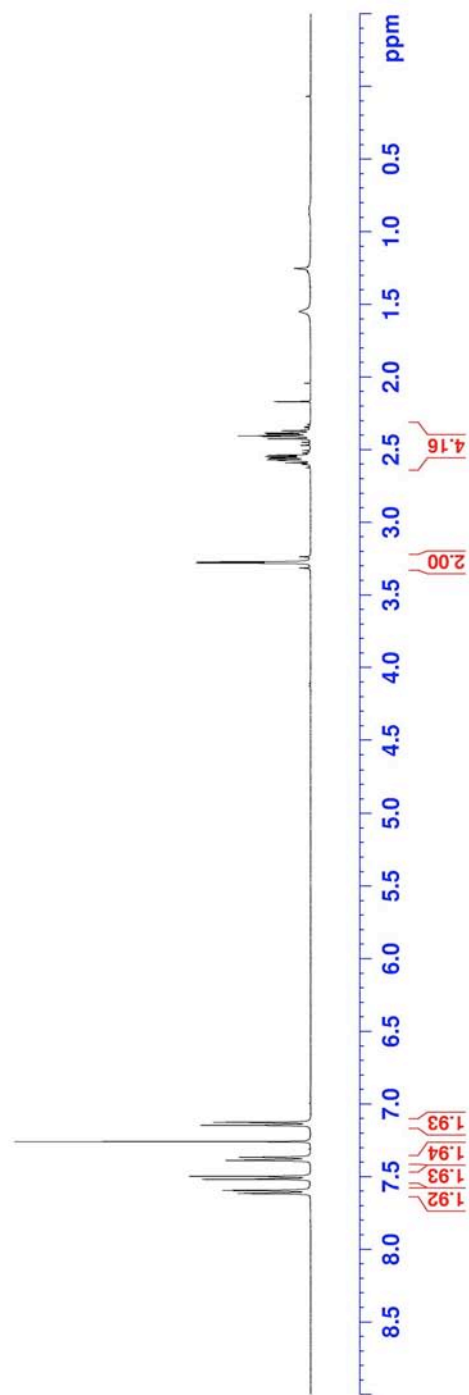



RZ-4-242E-C

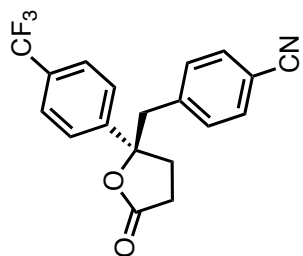

**9c**

<sup>13</sup>C NMR

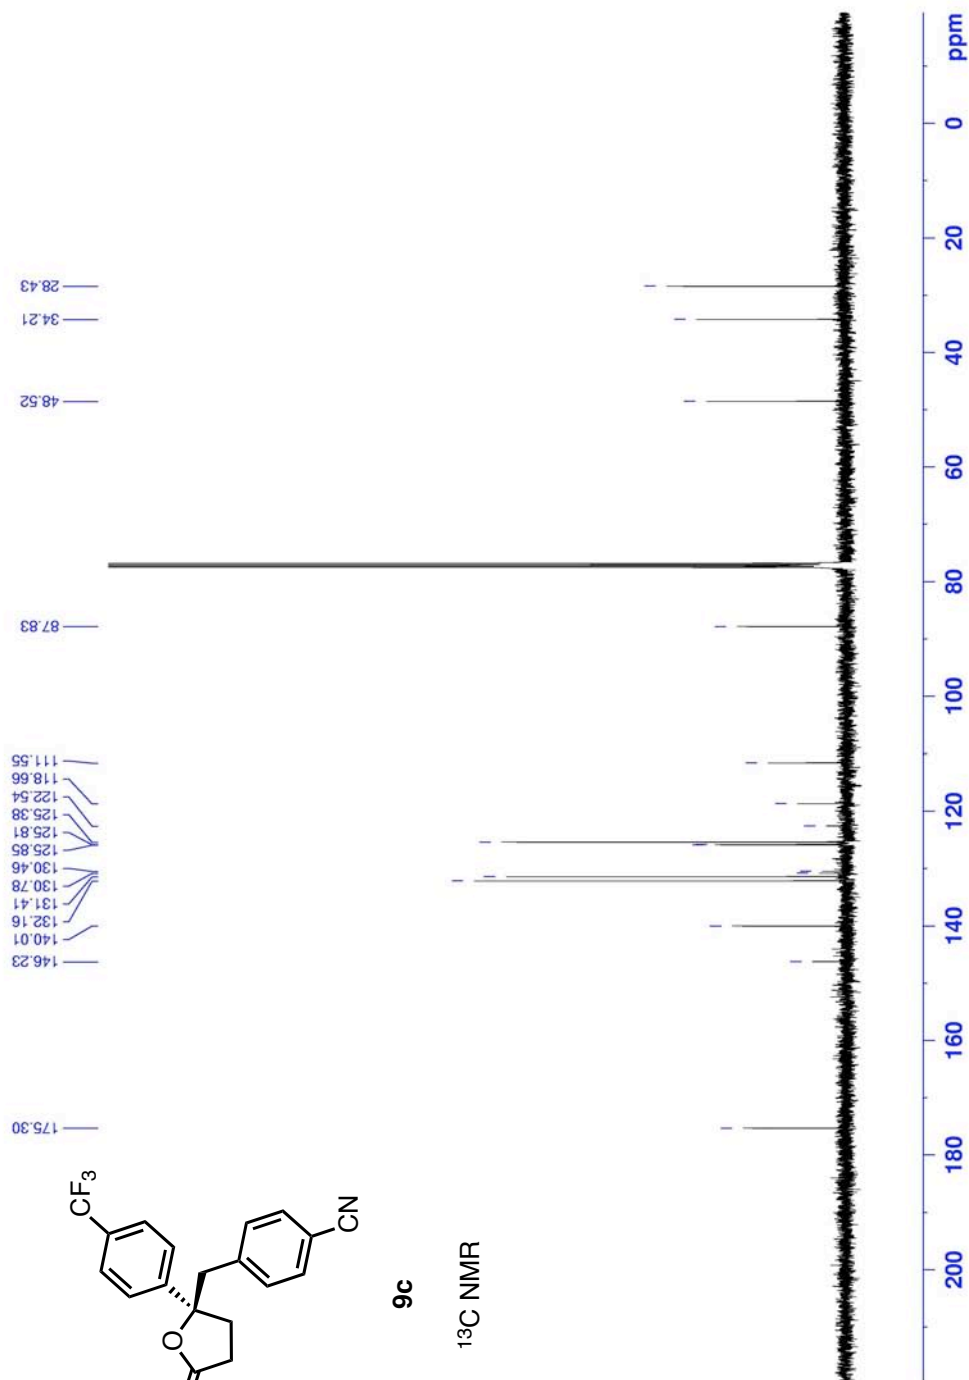

RZ-4-242E-E

69.29

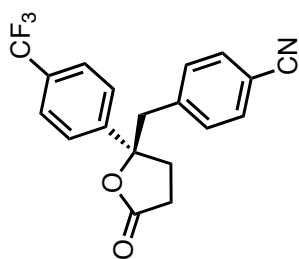

9c

<sup>19</sup>F NMR

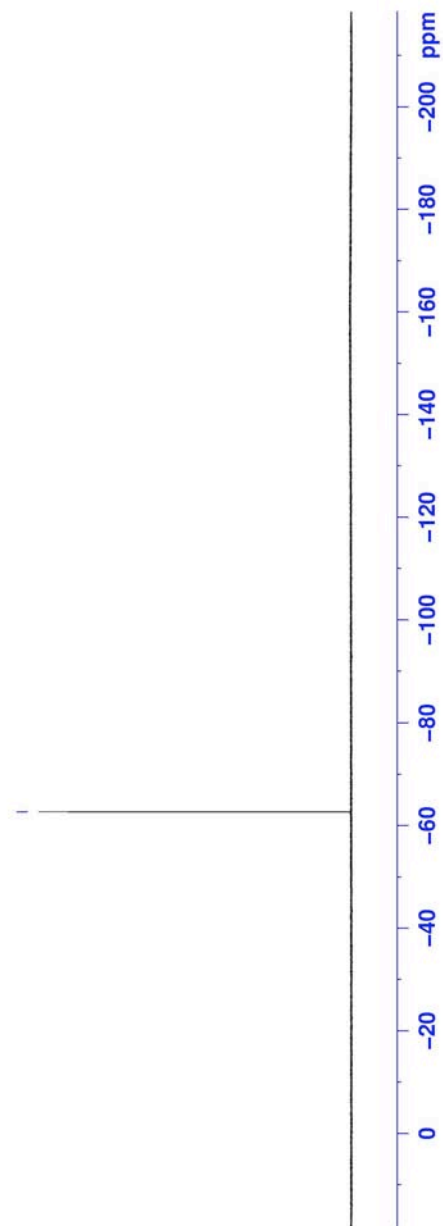

## HPLC traces for 9c:

Data File C:\CHEM32\1\DATA\RONG\NAOYUKI\_LC 2014-11-24 14-06-46\RZ-4-232A-RAC-.D  
Sample Name: RZ-4-232A-RAC

```
=====
Acq. Operator   : RZ                      Seq. Line :   10
Acq. Instrument : Instrument 1             Location  : Vial 26
Injection Date  : 11/24/2014 8:59:39 PM    Inj       :    1
                                           Inj Volume: 1 µl
Different Inj Volume from Sequence !      Actual Inj Volume : 15 µl
Acq. Method     : C:\CHEM32\1\DATA\RONG\NAOYUKI_LC 2014-11-24 14-06-46\RZ-SHUTDOWN.M
```

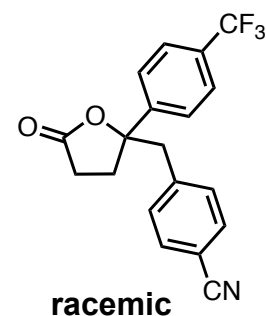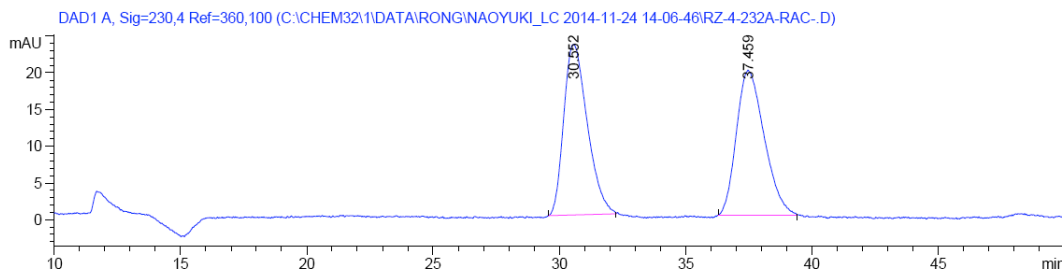

Signal 1: DAD1 A, Sig=230,4 Ref=360,100

| Peak # | RetTime [min] | Type | Width [min] | Area [mAU*s] | Height [mAU] | Area %  |
|--------|---------------|------|-------------|--------------|--------------|---------|
| 1      | 30.552        | BB   | 0.7657      | 1511.29687   | 23.27001     | 49.9620 |
| 2      | 37.459        | BB   | 0.9065      | 1513.59387   | 19.78445     | 50.0380 |

Totals : 3024.89075 43.05446

Data File C:\CHEM32\1\DATA\RONG\NAOYUKI\_LC 2014-12-12 20-03-53\RZ-4-242E.D  
Sample Name: RZ-4-242E

```
=====
Acq. Operator   : RZ                      Seq. Line :    2
Acq. Instrument : Instrument 1             Location  : Vial 17
Injection Date   : 12/12/2014 9:07:15 PM   Inj       :    1
                                           Inj Volume: 1 µl
Different Inj Volume from Sequence !      Actual Inj Volume : 3 µl
Acq. Method     : C:\CHEM32\1\DATA\RONG\NAOYUKI_LC 2014-12-12 20-03-53\RZ-SHUTDOWN.M
```

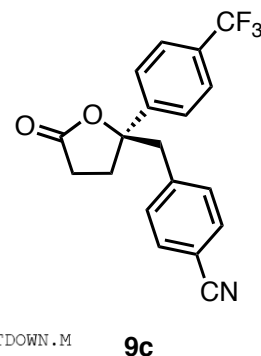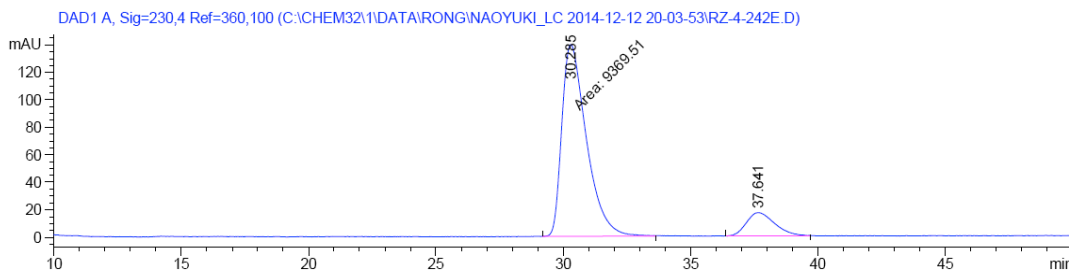

Signal 1: DAD1 A, Sig=230,4 Ref=360,100

| Peak # | RetTime [min] | Type | Width [min] | Area [mAU*s] | Height [mAU] | Area %  |
|--------|---------------|------|-------------|--------------|--------------|---------|
| 1      | 30.285        | MM   | 1.1201      | 9369.51172   | 139.41949    | 87.8881 |
| 2      | 37.641        | BB   | 0.9050      | 1291.21948   | 16.83233     | 12.1119 |

Totals : 1.06607e4 156.25183

RZ-4-242B-H

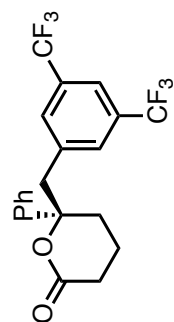

**9d**

<sup>1</sup>H NMR

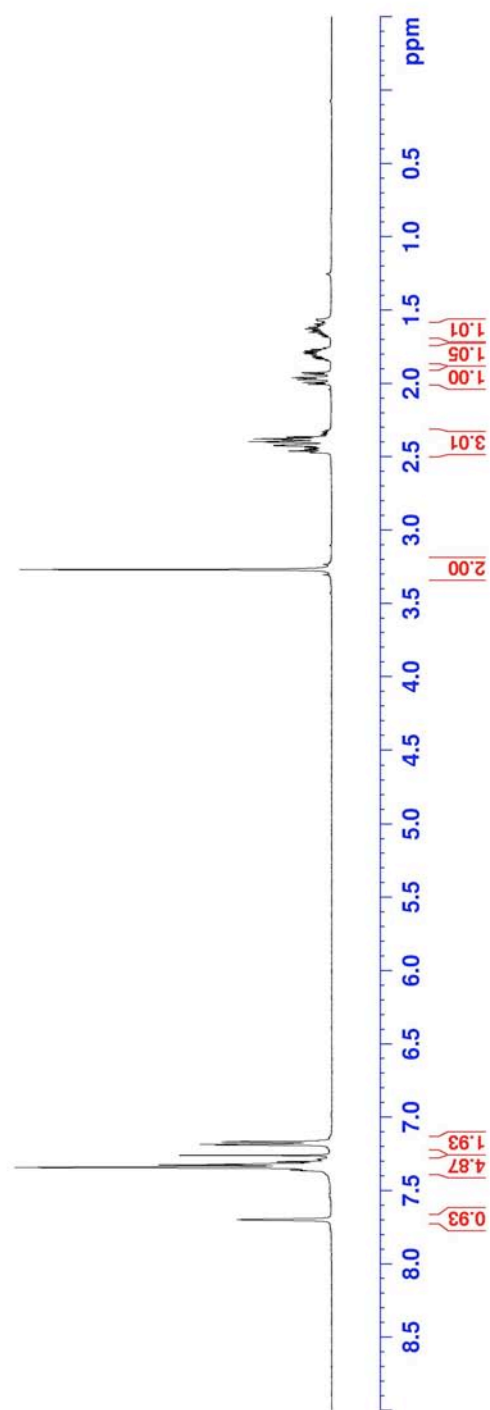

RZ-4-242B-C

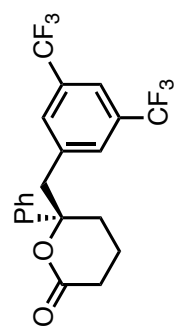

**9d**

<sup>13</sup>C NMR

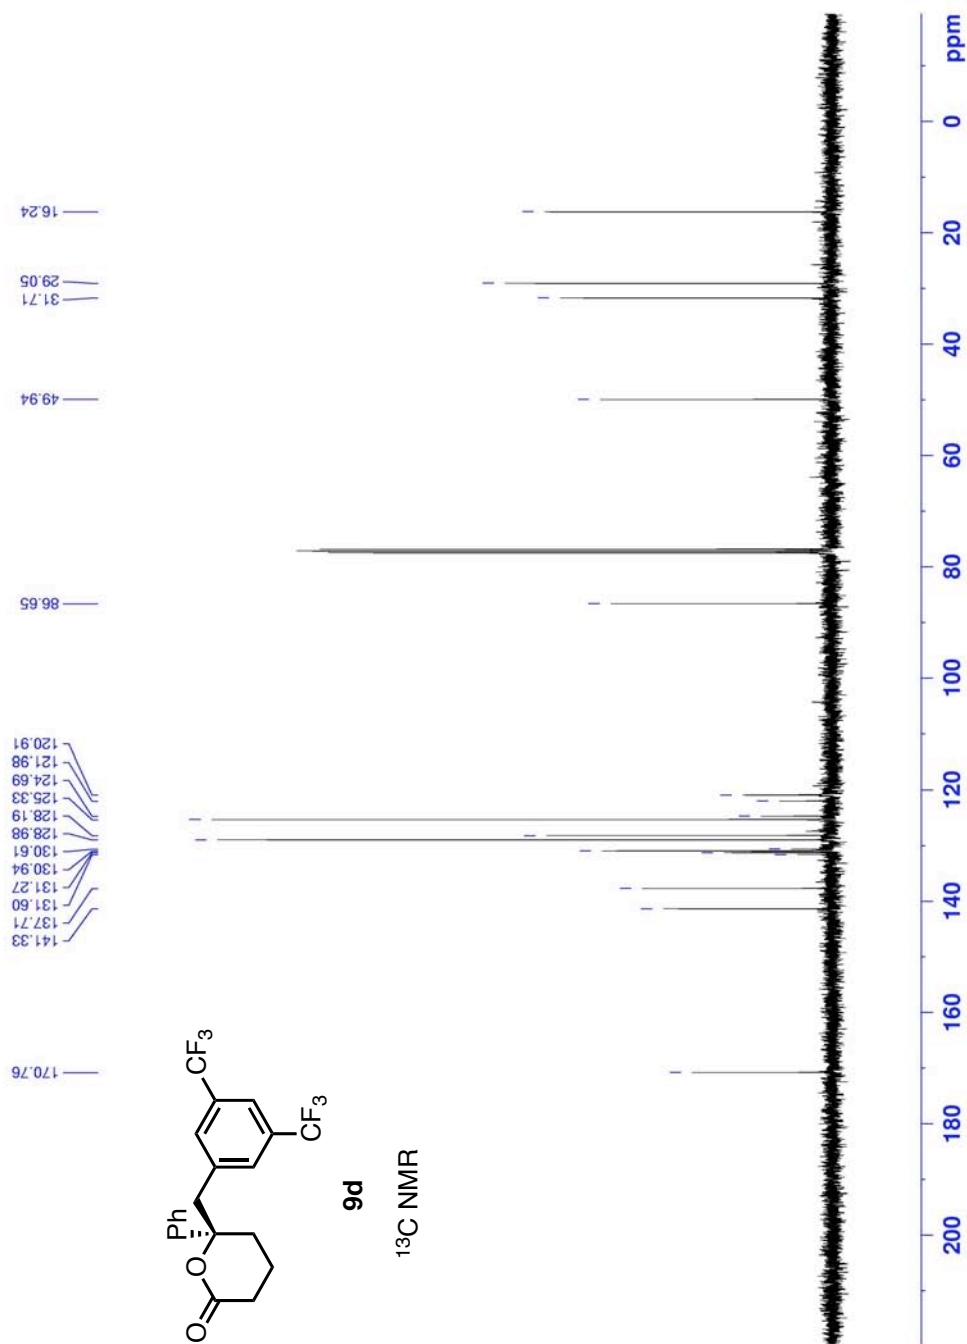

RZ-4-242B-F

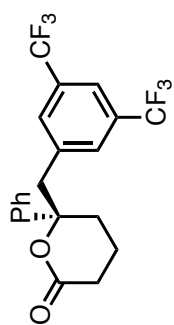

**9d**

<sup>19</sup>F NMR

162.91

0 -20 -40 -60 -80 -100 -120 -140 -160 -180 -200 ppm

## HPLC traces for 9d:

Data File C:\CHEM32\1\DATA\RONG\NAOYUKI\_LC 2014-12-14 08-09-11\RZ-4-242B-RAC.D  
Sample Name: RZ-4-242B-RAC

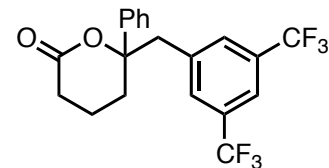

**racemic**

```
=====
Acq. Operator   : RZ                      Seq. Line :    1
Acq. Instrument : Instrument 1             Location  : Vial 16
Injection Date  : 12/14/2014 8:11:37 AM    Inj       :    1
                                           Inj Volume: 1 µl
Different Inj Volume from Sequence !      Actual Inj Volume : 3 µl
Acq. Method     : C:\CHEM32\1\DATA\RONG\NAOYUKI_LC 2014-12-14 08-09-11\RZ-SHUTDOWN.M
```

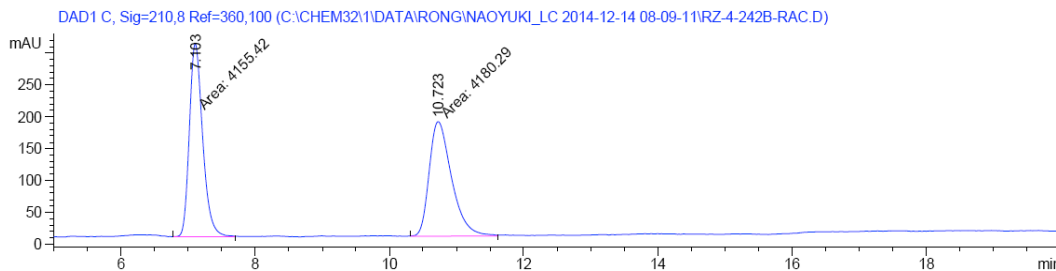

Signal 3: DAD1 C, Sig=210,8 Ref=360,100

| Peak # | RetTime [min] | Type | Width [min] | Area [mAU*s] | Height [mAU] | Area %  |
|--------|---------------|------|-------------|--------------|--------------|---------|
| 1      | 7.103         | MM   | 0.2288      | 4155.41895   | 302.69006    | 49.8508 |
| 2      | 10.723        | MM   | 0.3872      | 4180.28613   | 179.91805    | 50.1492 |

Totals : 8335.70508 482.60811

Data File C:\CHEM32\1\DATA\RONG\NAOYUKI\_LC 2014-12-10 09-18-36\RZ-4-242B.D  
Sample Name: RZ-4-242B

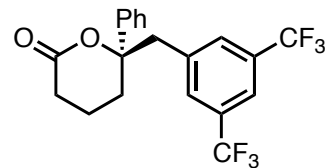

**9d**

```
=====
Acq. Operator   : RZ                      Seq. Line :    1
Acq. Instrument : Instrument 1             Location  : Vial 16
Injection Date  : 12/10/2014 9:20:55 AM    Inj       :    1
                                           Inj Volume: 1 µl
Different Inj Volume from Sequence !      Actual Inj Volume : 8 µl
Acq. Method     : C:\CHEM32\1\DATA\RONG\NAOYUKI_LC 2014-12-10 09-18-36\RZ-SHUTDOWN.M
```

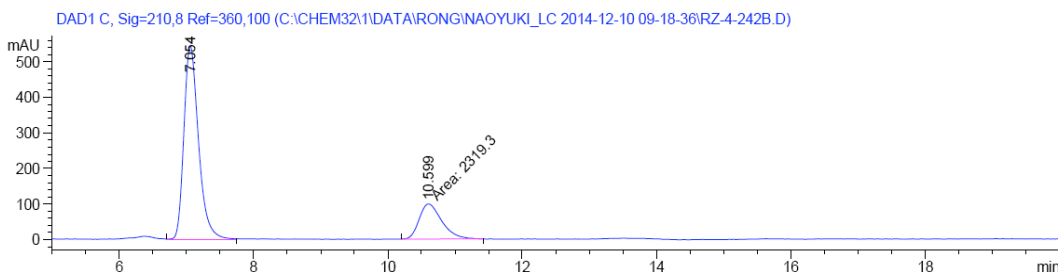

Signal 3: DAD1 C, Sig=210,8 Ref=360,100

| Peak # | RetTime [min] | Type | Width [min] | Area [mAU*s] | Height [mAU] | Area %  |
|--------|---------------|------|-------------|--------------|--------------|---------|
| 1      | 7.054         | VB   | 0.2347      | 8238.34180   | 543.82831    | 78.0320 |
| 2      | 10.599        | MM   | 0.3910      | 2319.30396   | 98.86506     | 21.9680 |

Totals : 1.05576e4 642.69337

RZ-4-235P1-H

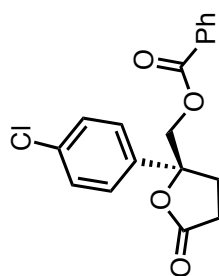

**13**

<sup>1</sup>H NMR

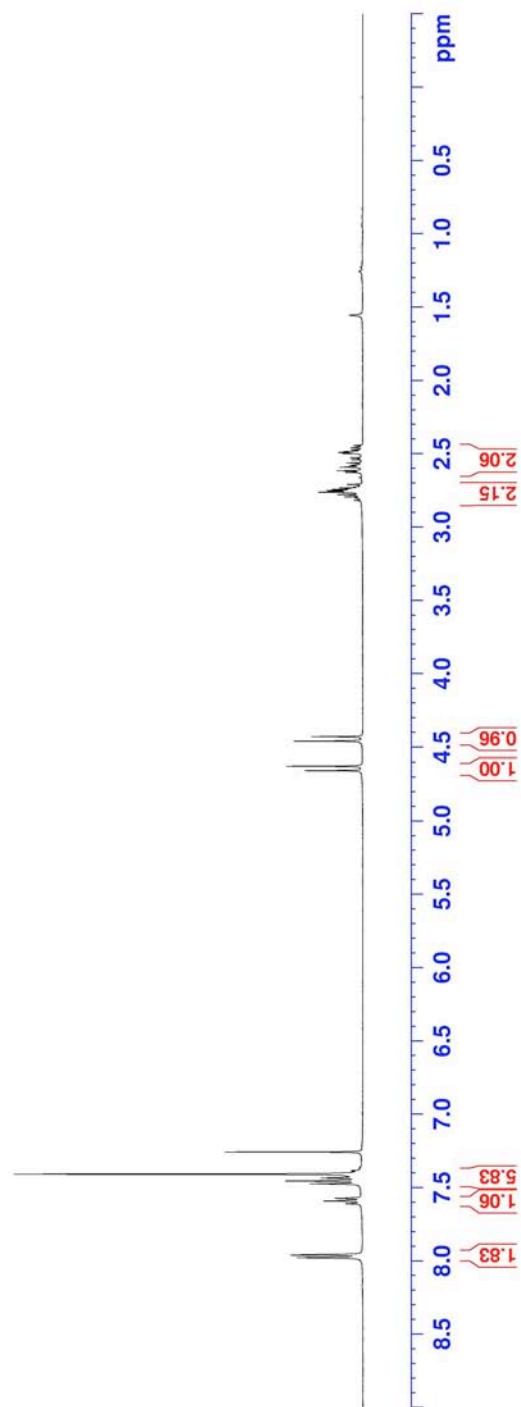



RZ-4-235P1-C

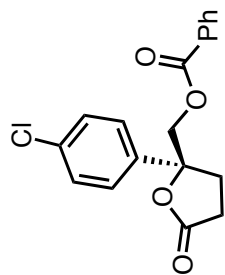

13

<sup>13</sup>C NMR

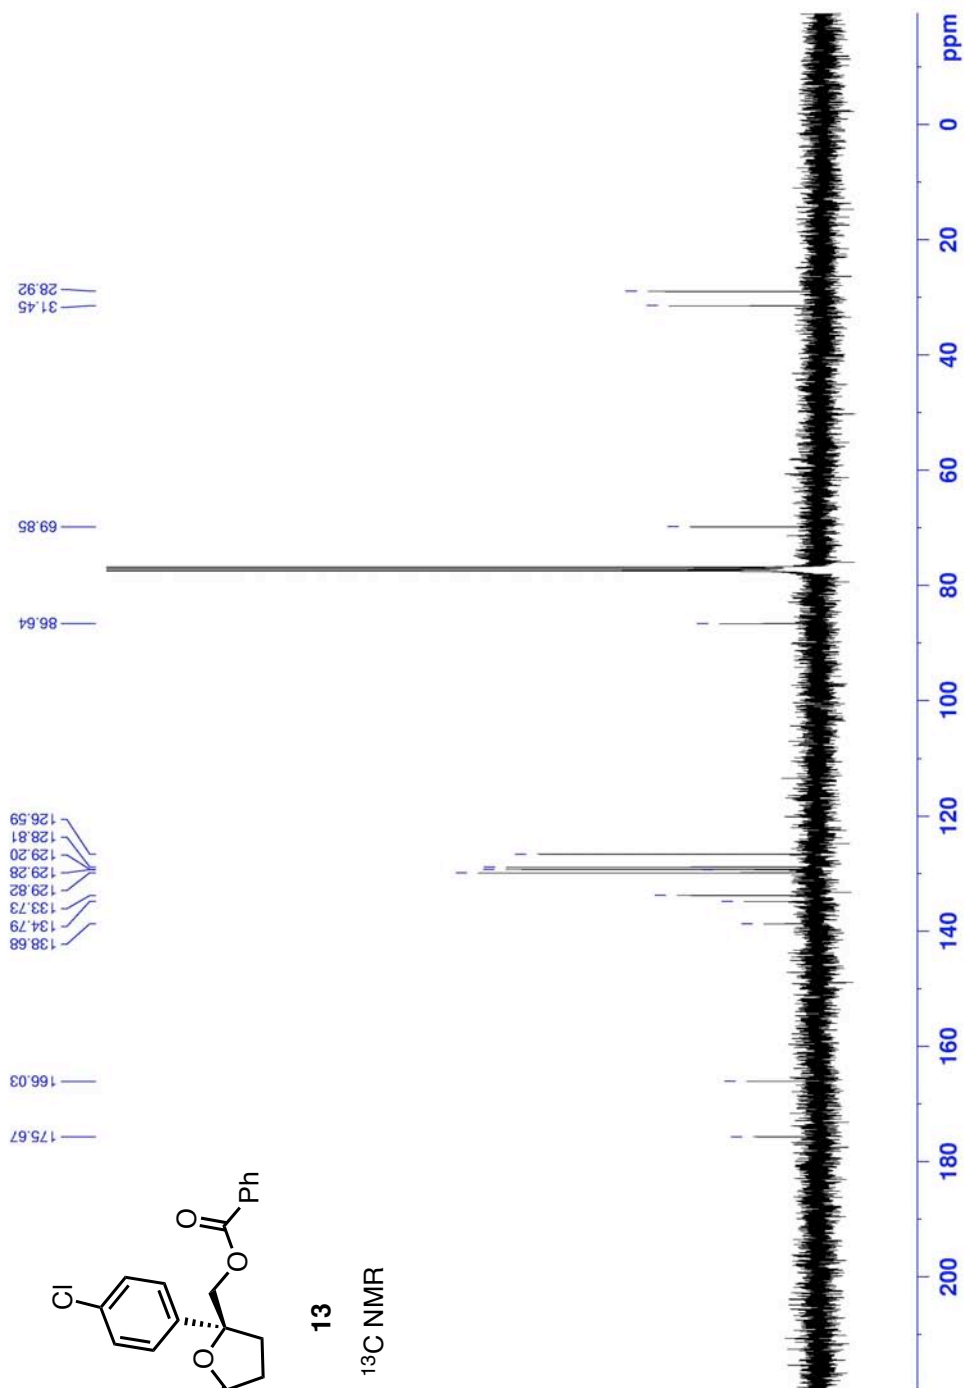

## HPLC traces for 13:

Data File C:\CHEM32\1\DATA\RONG\NAOYUKI\_LC 2014-12-08 10-35-33\RZ-4-235-P1-RAC.D  
Sample Name: RZ-4-235-P1-RAC

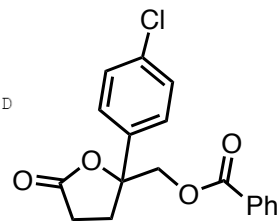

**racemic**

```
=====
Acq. Operator   : RZ                      Seq. Line :    2
Acq. Instrument : Instrument 1             Location  : Vial 18
Injection Date  : 12/8/2014 11:29:03 AM    Inj       :    1
                                           Inj Volume: 1 µl
Different Inj Volume from Sequence !      Actual Inj Volume : 10 µl
Acq. Method     : C:\CHEM32\1\DATA\RONG\NAOYUKI_LC 2014-12-08 10-35-33\RZ-SHUTDOWN.M
```

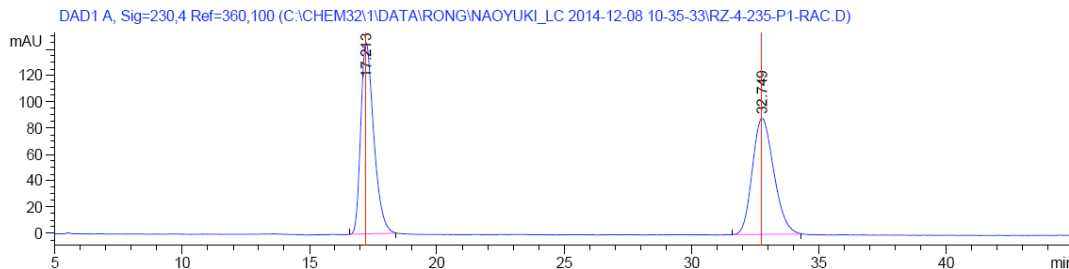

Signal 1: DAD1 A, Sig=230,4 Ref=360,100

| Peak # | RetTime [min] | Type | Width [min] | Area [mAU*s] | Height [mAU] | Area %  |
|--------|---------------|------|-------------|--------------|--------------|---------|
| 1      | 17.213        | BB   | 0.5263      | 5178.36182   | 145.83827    | 49.9535 |
| 2      | 32.749        | BB   | 0.8232      | 5187.99316   | 88.32819     | 50.0465 |

Totals : 1.03664e4 234.16647

Data File C:\CHEM32\1\DATA\RONG\NAOYUKI\_LC 2014-12-11 12-26-18\RZ-4-235P1-.D  
Sample Name: RZ-4-235P1

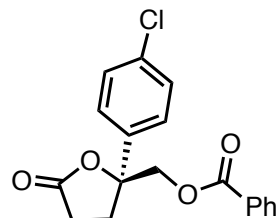

**13**

```
=====
Acq. Operator   : RZ                      Seq. Line :    3
Acq. Instrument : Instrument 1             Location  : Vial 16
Injection Date   : 12/11/2014 2:10:58 PM   Inj       :    1
                                           Inj Volume: 1 µl
Different Inj Volume from Sequence !      Actual Inj Volume : 8 µl
Acq. Method     : C:\CHEM32\1\DATA\RONG\NAOYUKI_LC 2014-12-11 12-26-18\RZ-SHUTDOWN.M
```

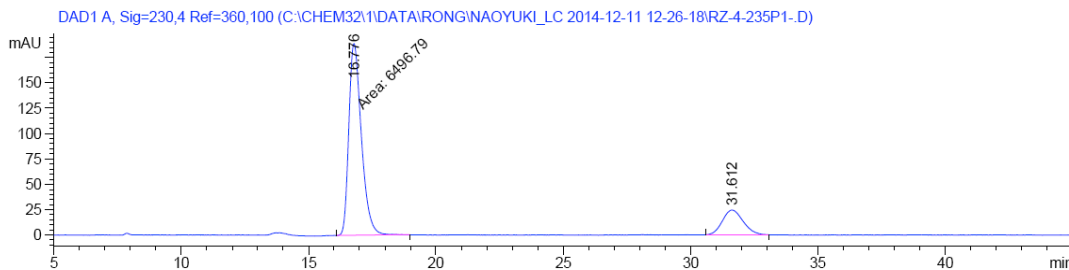

Signal 1: DAD1 A, Sig=230,4 Ref=360,100

| Peak # | RetTime [min] | Type | Width [min] | Area [mAU*s] | Height [mAU] | Area %  |
|--------|---------------|------|-------------|--------------|--------------|---------|
| 1      | 16.776        | MM   | 0.5730      | 6496.78809   | 188.96053    | 82.4137 |
| 2      | 31.612        | BB   | 0.6725      | 1386.35205   | 24.48735     | 17.5863 |

Totals : 7883.14014 213.44787

RZ-4-235P2-H

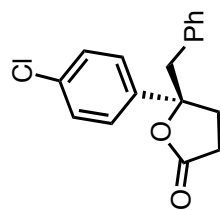

14

<sup>1</sup>H NMR

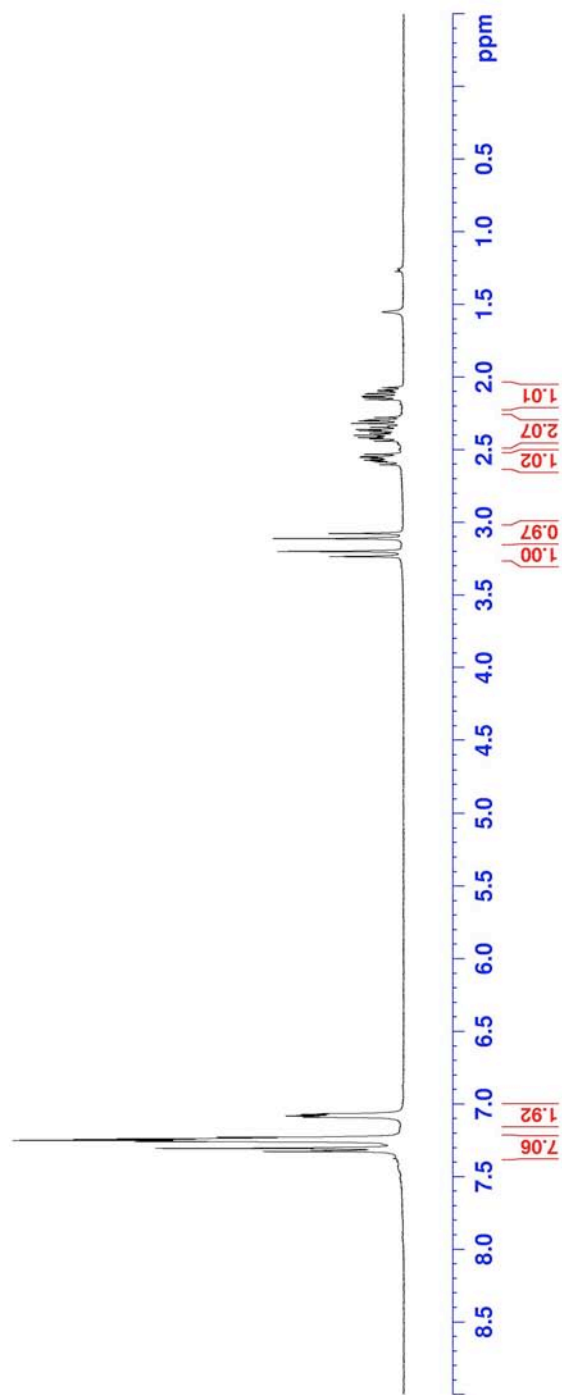

RZ-4-235P2-C

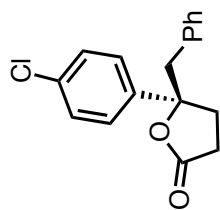

**14**

<sup>13</sup>C NMR

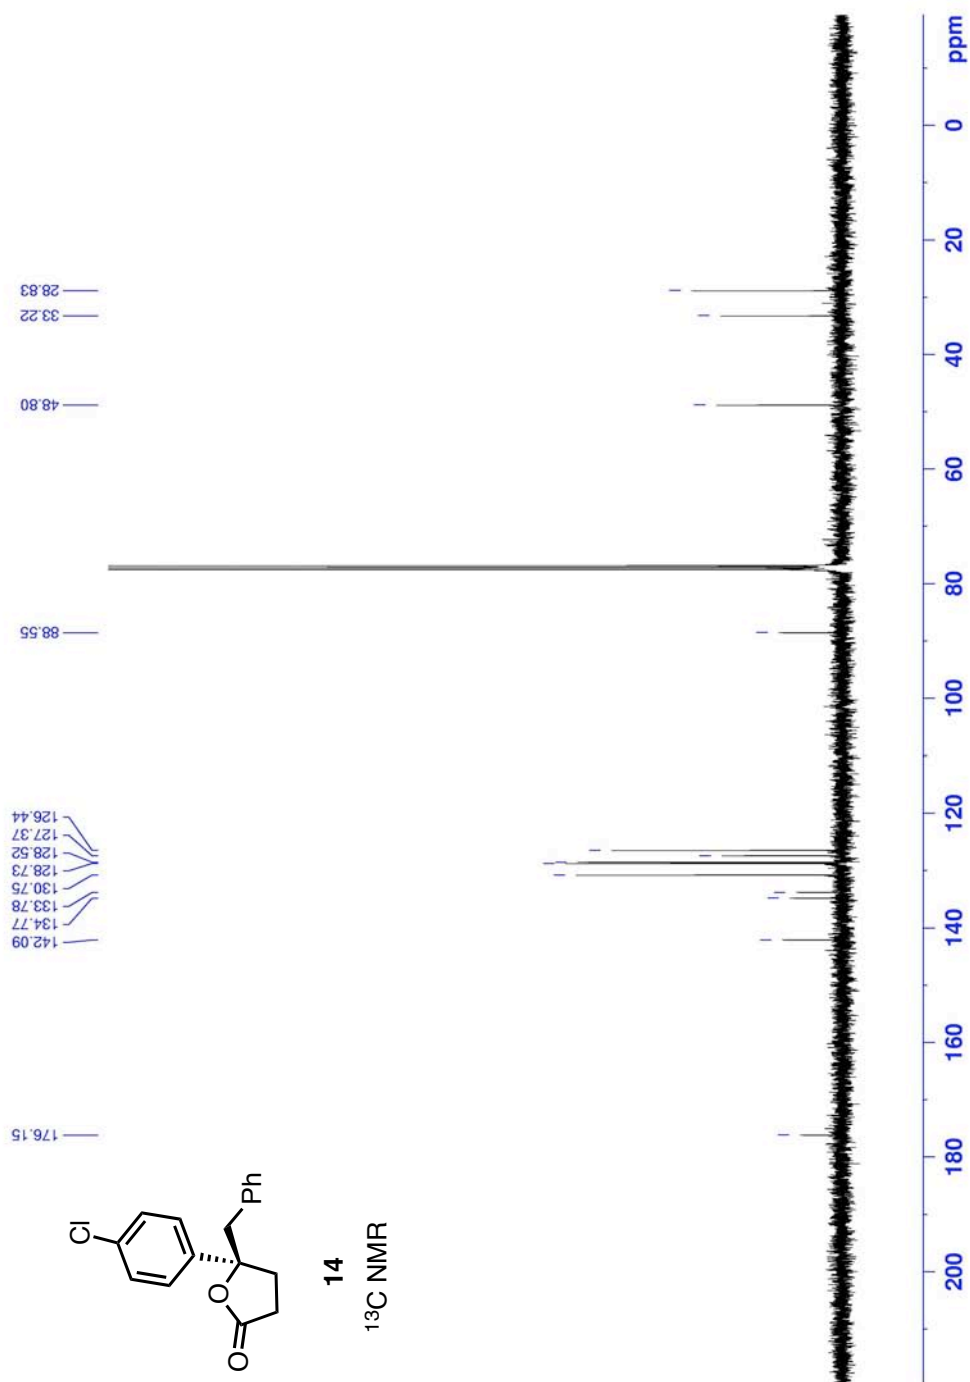

## HPLC traces for 14:

Data File C:\CHEM32\1\DATA\RONG\NAOYUKI\_LC 2014-12-08 10-35-33\RZ-4-235-P2-RAC.D  
Sample Name: RZ-4-235-P2-RAC

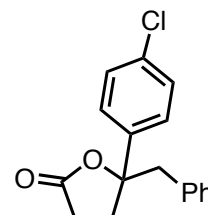

**racemic**

```
=====
Acq. Operator   : RZ                      Seq. Line :    4
Acq. Instrument : Instrument 1             Location  : Vial 19
Injection Date  : 12/8/2014 12:33:32 PM   Inj       :    1
                                           Inj Volume: 1 µl
Different Inj Volume from Sequence !      Actual Inj Volume : 10 µl
Acq. Method     : C:\CHEM32\1\DATA\RONG\NAOYUKI_LC 2014-12-08 10-35-33\RZ-5IPA-1ML-2013-.M
=====
```

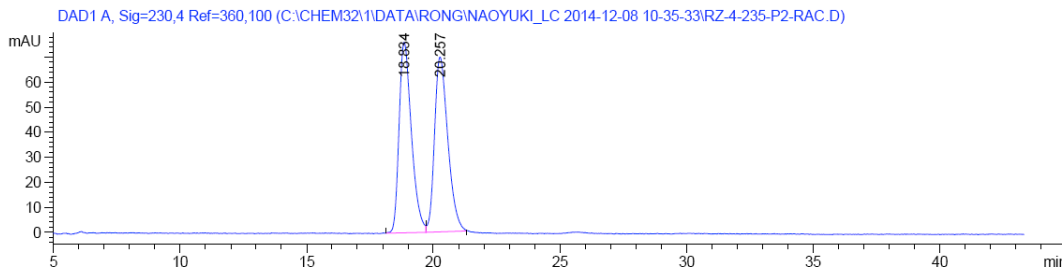

Signal 1: DAD1 A, Sig=230,4 Ref=360,100

| Peak # | RetTime [min] | Type | Width [min] | Area [mAU*s] | Height [mAU] | Area %  |
|--------|---------------|------|-------------|--------------|--------------|---------|
| 1      | 18.834        | BV   | 0.4962      | 2589.89990   | 76.26014     | 50.2433 |
| 2      | 20.257        | VB   | 0.5213      | 2564.81323   | 70.02714     | 49.7567 |

Totals : 5154.71313 146.28728

Data File C:\CHEM32\1\DATA\RONG\NAOYUKI\_LC 2014-12-11 12-26-18\RZ-4-235P2.D  
Sample Name: RZ-4-235P2

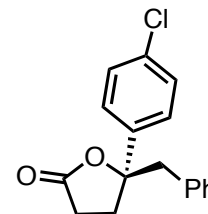

**14**

```
=====
Acq. Operator   : RZ                      Seq. Line :    5
Acq. Instrument : Instrument 1             Location  : Vial 17
Injection Date  : 12/11/2014 3:54:28 PM   Inj       :    1
                                           Inj Volume: 1 µl
Different Inj Volume from Sequence !      Actual Inj Volume : 8 µl
Acq. Method     : C:\CHEM32\1\DATA\RONG\NAOYUKI_LC 2014-12-11 12-26-18\RZ-5IPA-1ML-2013-.M
=====
```

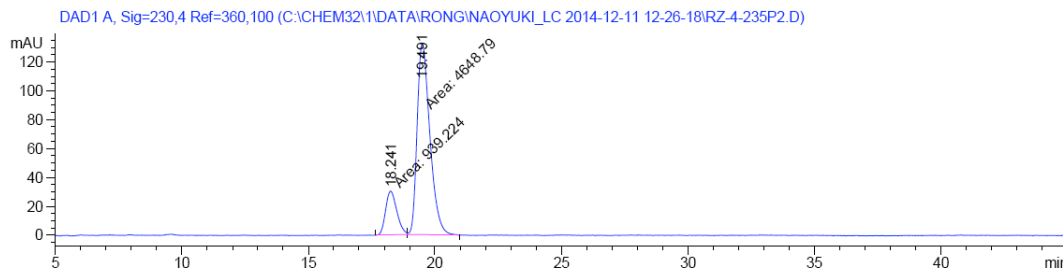

Signal 1: DAD1 A, Sig=230,4 Ref=360,100

| Peak # | RetTime [min] | Type | Width [min] | Area [mAU*s] | Height [mAU] | Area %  |
|--------|---------------|------|-------------|--------------|--------------|---------|
| 1      | 18.241        | MM   | 0.5151      | 939.22388    | 30.39110     | 16.8078 |
| 2      | 19.491        | MM   | 0.5848      | 4648.78662   | 132.48862    | 83.1922 |

Totals : 5588.01050 162.87972

RZ-4-239-H

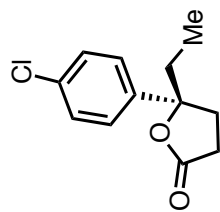

15

$^1\text{H}$  NMR

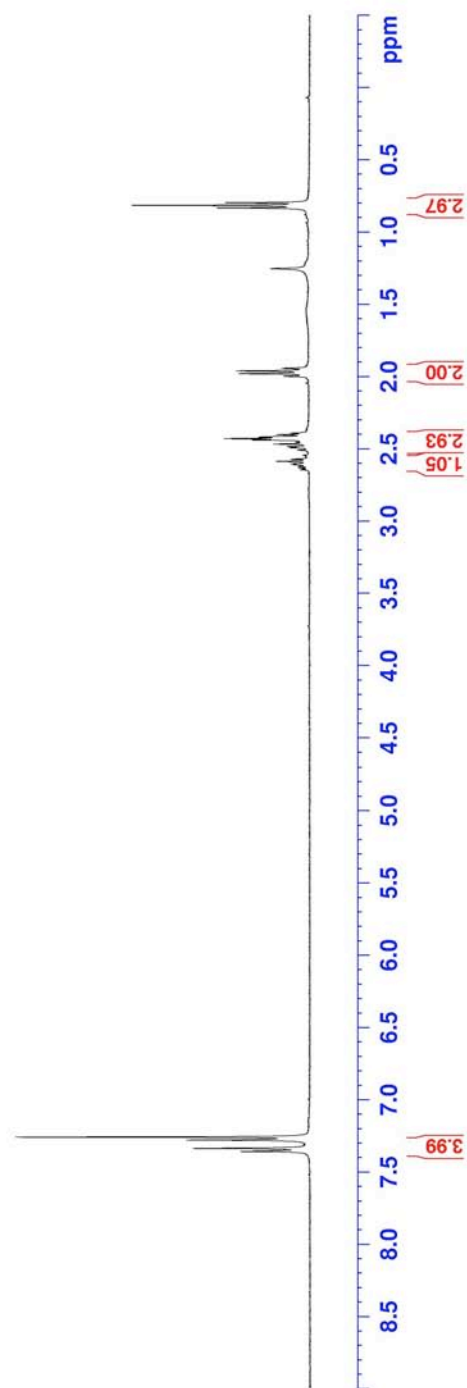

RZ-4-239-C

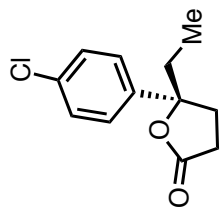

**15**  
<sup>13</sup>C NMR

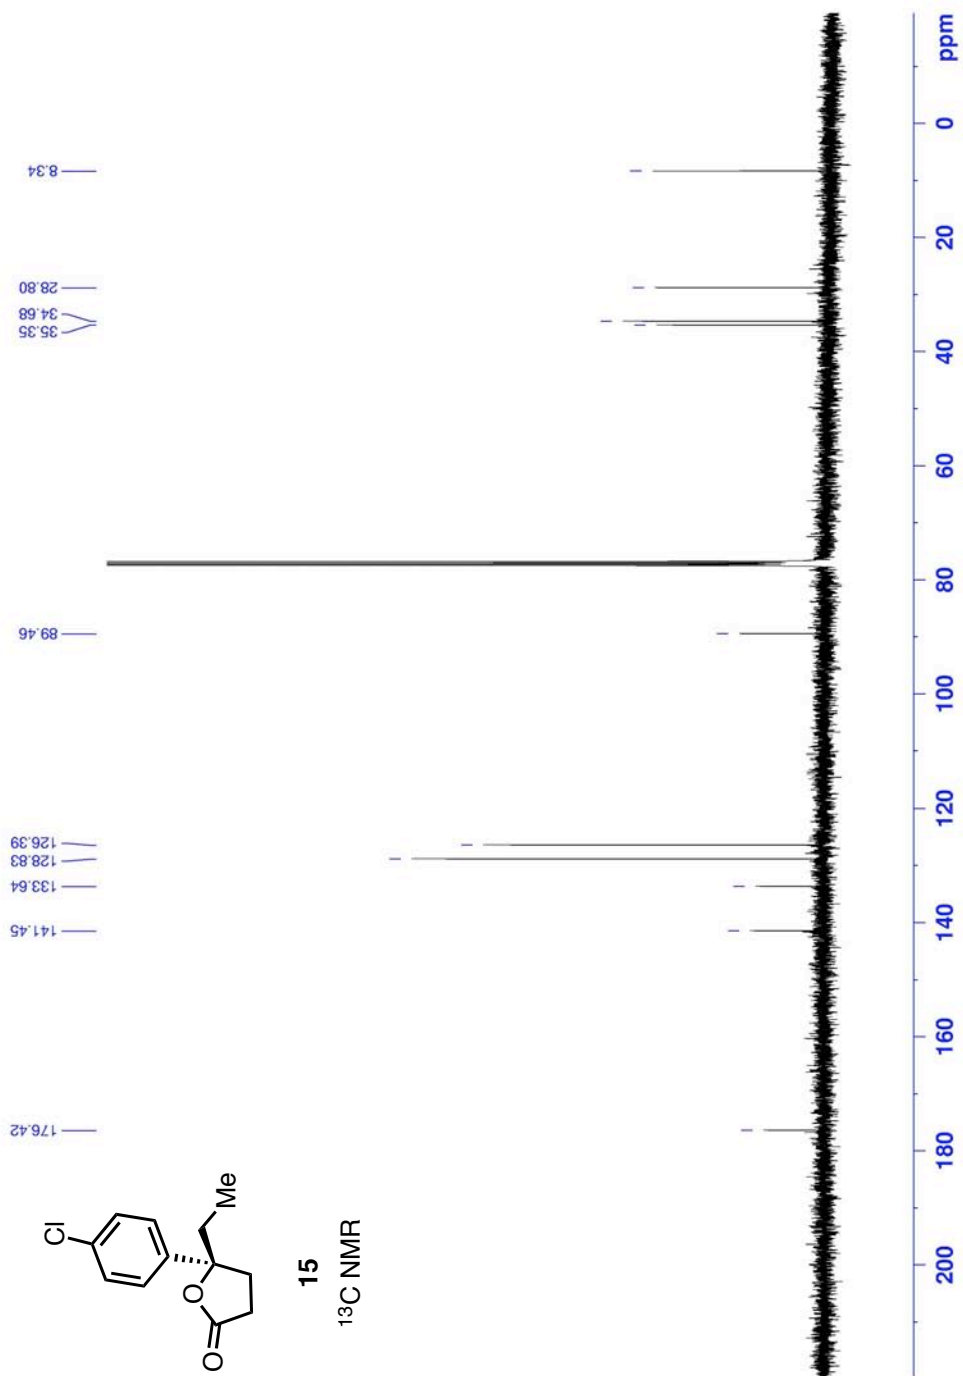

## HPLC traces for 15:

Data File C:\CHEM32\2\DATA\RONG\HPLC 2015-01-19 09-34-39\RZ-4-239-RAC.D  
Sample Name: RZ-4-239-RAC

```
=====
Acq. Operator   : RZ                      Seq. Line :    2
Acq. Instrument : Instrument 2             Location  : Vial 17
Injection Date  : 1/19/2015 10:06:27 AM    Inj       :    1
                                           Inj Volume: 5 µl
Different Inj Volume from Sequence !      Actual Inj Volume : 12 µl
Acq. Method     : C:\CHEM32\2\DATA\RONG\HPLC 2015-01-19 09-34-39\RZ-SHUTDOWN2013.M
```

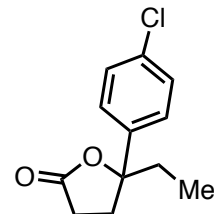

**racemic**

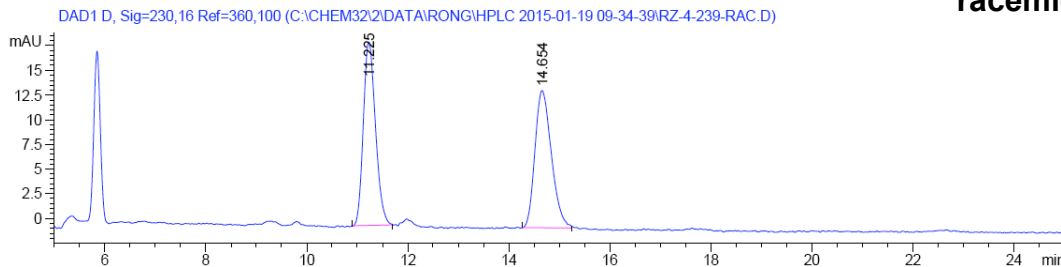

Signal 4: DAD1 D, Sig=230,16 Ref=360,100

| Peak # | RetTime [min] | Type | Width [min] | Area [mAU*s] | Height [mAU] | Area %  |
|--------|---------------|------|-------------|--------------|--------------|---------|
| 1      | 11.225        | BB   | 0.2635      | 311.88034    | 18.60761     | 49.7788 |
| 2      | 14.654        | BB   | 0.3397      | 314.65201    | 13.91962     | 50.2212 |

Totals : 626.53235 32.52723

Data File C:\CHEM32\2\DATA\RONG\HPLC 2015-01-19 09-34-39\RZ-4-239-.D  
Sample Name: RZ-4-239-

```
=====
Acq. Operator   : RZ                      Seq. Line :    1
Acq. Instrument : Instrument 2             Location  : Vial 16
Injection Date   : 1/19/2015 9:36:52 AM    Inj       :    1
                                           Inj Volume: 5 µl
Different Inj Volume from Sequence !      Actual Inj Volume : 8 µl
Acq. Method     : C:\CHEM32\2\DATA\RONG\HPLC 2015-01-19 09-34-39\RZ-SHUTDOWN2013.M
```

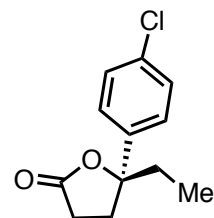

**15**

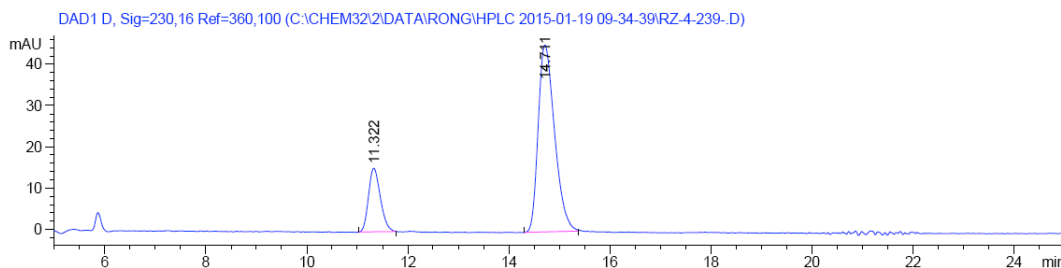

Signal 4: DAD1 D, Sig=230,16 Ref=360,100

| Peak # | RetTime [min] | Type | Width [min] | Area [mAU*s] | Height [mAU] | Area %  |
|--------|---------------|------|-------------|--------------|--------------|---------|
| 1      | 11.322        | BB   | 0.2515      | 253.43941    | 15.44407     | 19.8738 |
| 2      | 14.711        | BB   | 0.3512      | 1021.80634   | 45.29997     | 80.1262 |

Totals : 1275.24574 60.74404
